# Supplementary material for: Nine New Antibacterial Diterpenes and Steroids from the South China Sea Soft Coral Lobophytum catalai Tixier-Durivault
Source: MDPI journal article supplement (doi:10.3390/md22010050), 2024-01-20
Supplement: s1 [file s1]

## Supplementary Material

# Nine New Antibacterial Diterpenes and Steroids from the South China Sea soft coral *Lobophytum catalai* Tixier-Durivault

Sheng-Hui Zhu<sup>2,3</sup>, Yuan-Min Chang<sup>2</sup>, Ming-Zhi Su<sup>2</sup>, Li-Gong Yao<sup>2</sup>, Song-Wei Li<sup>1,\*</sup>, Hong Wang<sup>3,\*</sup> and Yue-Wei Guo<sup>1,2,3,\*</sup>

<sup>1</sup> School of Medicine, Shanghai University, Shanghai 200444, China

<sup>2</sup> Shandong Laboratory of Yantai Drug Discovery, Bohai Rim Advanced Research Institute for Drug Discovery, Yantai 264117, China; zhushenghui0115@163.com (S.-H. Z.); 13153672940@163.com (Y.-M.C.) yaoligong@simm.ac.cn (L.-G.Y.); smz0310@163.com (M.-Z.S.)

<sup>3</sup> Collaborative Innovation Center of Yangtze River Delta Region Green Pharmaceuticals and College of Pharmaceutical Science, Zhejiang University of Technology, Hangzhou 310014, China

\* Correspondence: simmswli@163.com (S.-W. L.); hongw@zjut.edu.cn (H. W.); ywguo@simm.ac.cn (Y.-W. G.)

\*Corresponding author.

E-mail addresses: ywguo@simm.ac.cn

## Table of Contents

|                                                                                                                           |           |
|---------------------------------------------------------------------------------------------------------------------------|-----------|
| <b>1. X-ray crystallographic analyses .....</b>                                                                           | <b>3</b>  |
| <b>2. Spectra of compound 1.....</b>                                                                                      | <b>4</b>  |
| <b>Figure S1.1</b> <sup>1</sup> H NMR spectrum (600 MHz) of compound <b>1</b> in CDCl <sub>3</sub> . ....                 | <b>4</b>  |
| <b>Figure S1.2</b> <sup>13</sup> C NMR spectrum (150 MHz) of compound <b>1</b> in CDCl <sub>3</sub> .....                 | <b>4</b>  |
| <b>Figure S1.3</b> HSQC spectrum (600 MHz) of compound <b>1</b> in CDCl <sub>3</sub> .....                                | <b>5</b>  |
| <b>Figure S1.4</b> HMBC spectrum (600 MHz) of compound <b>1</b> in CDCl <sub>3</sub> .....                                | <b>5</b>  |
| <b>Figure S1.5</b> <sup>1</sup> H- <sup>1</sup> H COSY spectrum (600 MHz) of compound <b>1</b> in CDCl <sub>3</sub> ..... | <b>6</b>  |
| <b>Figure S1.6</b> NOESY spectrum (600 MHz) of compound <b>1</b> in CDCl <sub>3</sub> .....                               | <b>6</b>  |
| <b>Figure S1.7</b> HR-ESIMS spectrum of compound <b>1</b> . ....                                                          | <b>7</b>  |
| <b>Figure S1.8</b> IR spectrum of compound <b>1</b> . ....                                                                | <b>7</b>  |
| <b>Figure S1.9</b> CD and UV spectra of compound <b>1</b> . ....                                                          | <b>8</b>  |
| <b>Figure S1.10</b> <sup>1</sup> H NMR spectrum (400 MHz) of compound <b>1a</b> .....                                     | <b>8</b>  |
| <b>3. Spectra of compound 2.....</b>                                                                                      | <b>9</b>  |
| <b>Figure S2.1</b> <sup>1</sup> H NMR spectrum (800 MHz) of compound <b>2</b> in CDCl <sub>3</sub> . ....                 | <b>9</b>  |
| <b>Figure S2.2</b> <sup>13</sup> C NMR spectrum (150 MHz) of compound <b>2</b> in CDCl <sub>3</sub> .....                 | <b>9</b>  |
| <b>Figure S2.3</b> HSQC spectrum (800 MHz) of compound <b>2</b> in CDCl <sub>3</sub> .....                                | <b>10</b> |
| <b>Figure S2.4</b> HMBC spectrum (800 MHz) of compound <b>2</b> in CDCl <sub>3</sub> .....                                | <b>10</b> |
| <b>Figure S2.5</b> <sup>1</sup> H- <sup>1</sup> H COSY spectrum (800 MHz) of compound <b>2</b> in CDCl <sub>3</sub> ..... | <b>11</b> |
| <b>Figure S2.6</b> NOESY spectrum (800 MHz) of compound <b>2</b> in CDCl <sub>3</sub> .....                               | <b>11</b> |
| <b>Figure S2.7</b> HR-ESIMS spectrum of compound <b>2</b> . ....                                                          | <b>12</b> |
| <b>Figure S2.8</b> IR spectrum of compound <b>2</b> . ....                                                                | <b>12</b> |
| <b>Figure S2.9</b> CD and UV spectra of compound <b>2</b> . ....                                                          | <b>12</b> |
| <b>4. Spectra of compound 3.....</b>                                                                                      | <b>13</b> |
| <b>Figure S3.1</b> <sup>1</sup> H NMR spectrum (600 MHz) of compound <b>3</b> in CDCl <sub>3</sub> . ....                 | <b>13</b> |
| <b>Figure S3.2</b> <sup>13</sup> C NMR spectrum (150 MHz) of compound <b>3</b> in CDCl <sub>3</sub> .....                 | <b>13</b> |
| <b>Figure S3.3</b> HSQC spectrum (600 MHz) of compound <b>3</b> in CDCl <sub>3</sub> .....                                | <b>14</b> |
| <b>Figure S3.4</b> HMBC spectrum (600 MHz) of compound <b>3</b> in CDCl <sub>3</sub> .....                                | <b>14</b> |
| <b>Figure S3.5</b> <sup>1</sup> H- <sup>1</sup> H COSY spectrum (600 MHz) of compound <b>3</b> in CDCl <sub>3</sub> ..... | <b>15</b> |
| <b>Figure S3.6</b> NOESY spectrum (600 MHz) of compound <b>3</b> in CDCl <sub>3</sub> .....                               | <b>15</b> |
| <b>Figure S3.7</b> HR-ESIMS spectrum of compound <b>3</b> . ....                                                          | <b>16</b> |
| <b>Figure S3.8</b> IR spectrum of compound <b>3</b> . ....                                                                | <b>16</b> |
| <b>Figure S3.9</b> CD and UV spectrum of compound <b>3</b> . ....                                                         | <b>16</b> |
| <b>5. Spectra of compound 4.....</b>                                                                                      | <b>17</b> |

|                                                                                                            |           |
|------------------------------------------------------------------------------------------------------------|-----------|
| Figure S4.1 $^1\text{H}$ NMR spectrum (800 MHz) of compound <b>4</b> in $\text{CDCl}_3$ .                  | 17        |
| Figure S4.2 $^{13}\text{C}$ NMR spectrum (150 MHz) of compound <b>4</b> in $\text{CDCl}_3$ .               | 17        |
| Figure S4.3 HSQC spectrum (800 MHz) of compound <b>4</b> in $\text{CDCl}_3$ .                              | 18        |
| Figure S4.4 HMBC spectrum (800 MHz) of compound <b>4</b> in $\text{CDCl}_3$ .                              | 18        |
| Figure S4.5 $^1\text{H}$ - $^1\text{H}$ COSY spectrum (800 MHz) of compound <b>4</b> in $\text{CDCl}_3$ .  | 19        |
| Figure S4.6 NOESY spectrum (800 MHz) of compound <b>4</b> in $\text{CDCl}_3$ .                             | 19        |
| Figure S4.7 HR-ESIMS spectrum of compound <b>4</b> .                                                       | 20        |
| Figure S4.8 IR spectrum of compound <b>4</b> .                                                             | 20        |
| Figure S4.9 CD and UV spectrum of compound <b>4</b> .                                                      | 20        |
| <b>6. Spectra of compound 5.</b>                                                                           | <b>21</b> |
| Figure S5.1 $^1\text{H}$ NMR spectrum (600 MHz) of compound <b>5</b> in $\text{CDCl}_3$ .                  | 21        |
| Figure S5.2 $^{13}\text{C}$ NMR spectrum (150 MHz) of compound <b>5</b> in $\text{CDCl}_3$ .               | 21        |
| Figure S5.3 HSQC spectrum (600 MHz) of compound <b>5</b> in $\text{CDCl}_3$ .                              | 22        |
| Figure S5.4 HMBC spectrum (600 MHz) of compound <b>5</b> in $\text{CDCl}_3$ .                              | 22        |
| Figure S5.5 $^1\text{H}$ - $^1\text{H}$ COSY spectrum (600 MHz) of compound <b>5</b> in $\text{CDCl}_3$ .  | 23        |
| Figure S5.6 NOESY spectrum (600 MHz) of compound <b>5</b> in $\text{CDCl}_3$ .                             | 23        |
| Figure S5.7 HR-ESIMS spectrum of compound <b>5</b> .                                                       | 24        |
| Figure S5.8 IR spectrum of compound <b>5</b> .                                                             | 24        |
| Figure S5.9 CD and UV spectrum of compound <b>5</b> .                                                      | 24        |
| <b>7. Spectra of compound 9.</b>                                                                           | <b>25</b> |
| Figure S6.1 $^1\text{H}$ NMR spectrum (600 MHz) of compound <b>9</b> in $\text{CDCl}_3$ .                  | 25        |
| Figure S6.2 $^{13}\text{C}$ NMR spectrum (150 MHz) of compound <b>9</b> in $\text{CDCl}_3$ .               | 25        |
| Figure S6.3 HSQC spectrum (600 MHz) of compound <b>9</b> in $\text{CDCl}_3$ .                              | 26        |
| Figure S6.4 HMBC spectrum (600 MHz) of compound <b>9</b> in $\text{CDCl}_3$ .                              | 26        |
| Figure S6.5 $^1\text{H}$ - $^1\text{H}$ COSY spectrum (600 MHz) of compound <b>9</b> in $\text{CDCl}_3$ .  | 27        |
| Figure S6.6 NOESY spectrum (600 MHz) of compound <b>9</b> in $\text{CDCl}_3$ .                             | 27        |
| Figure S6.7 HR-ESIMS spectrum of compound <b>9</b> .                                                       | 28        |
| Figure S6.8 IR spectrum of compound <b>9</b> .                                                             | 28        |
| <b>8. Spectra of compound 10.</b>                                                                          | <b>29</b> |
| Figure S7.1 $^1\text{H}$ NMR spectrum (600 MHz) of compound <b>10</b> in $\text{CDCl}_3$ .                 | 29        |
| Figure S7.2 $^{13}\text{C}$ NMR spectrum (150 MHz) of compound <b>10</b> in $\text{CDCl}_3$ .              | 29        |
| Figure S7.3 HSQC spectrum (600 MHz) of compound <b>10</b> in $\text{CDCl}_3$ .                             | 30        |
| Figure S7.4 HMBC spectrum (600 MHz) of compound <b>10</b> in $\text{CDCl}_3$ .                             | 30        |
| Figure S7.5 $^1\text{H}$ - $^1\text{H}$ COSY spectrum (600 MHz) of compound <b>10</b> in $\text{CDCl}_3$ . | 31        |
| Figure S7.6 NOESY spectrum (600 MHz) of compound <b>10</b> in $\text{CDCl}_3$ .                            | 31        |
| Figure S7.7 HR-ESIMS spectrum of compound <b>10</b> .                                                      | 32        |
| Figure S7.8 IR spectrum of compound <b>10</b> .                                                            | 32        |
| <b>9. Spectra of compound 11.</b>                                                                          | <b>33</b> |
| Figure S8.1 $^1\text{H}$ NMR spectrum (600 MHz) of compound <b>11</b> in $\text{CDCl}_3$ .                 | 33        |
| Figure S8.2 $^{13}\text{C}$ NMR spectrum (150 MHz) of compound <b>11</b> in $\text{CDCl}_3$ .              | 33        |

|                                                                                                                     |           |
|---------------------------------------------------------------------------------------------------------------------|-----------|
| Figure S8.3 HSQC spectrum (600 MHz) of compound <b>11</b> in CDCl <sub>3</sub> .....                                | 34        |
| Figure S8.4 HMBC spectrum (600 MHz) of compound <b>11</b> in CDCl <sub>3</sub> .....                                | 34        |
| Figure S8.5 <sup>1</sup> H- <sup>1</sup> H COSY spectrum (600 MHz) of compound <b>11</b> in CDCl <sub>3</sub> ..... | 35        |
| Figure S8.6 NOESY spectrum (600 MHz) of compound <b>11</b> in CDCl <sub>3</sub> .....                               | 35        |
| Figure S8.7 HR-ESIMS spectrum of compound <b>11</b> .....                                                           | 36        |
| Figure S8.8 IR spectrum of compound <b>11</b> . .....                                                               | 36        |
| <b>10. Spectra of compound 12</b> .....                                                                             | <b>37</b> |
| Figure S9.1 <sup>1</sup> H NMR spectrum (600 MHz) of compound <b>12</b> in CDCl <sub>3</sub> . .....                | 37        |
| Figure S9.2 <sup>13</sup> C NMR spectrum (150 MHz) of compound <b>12</b> in CDCl <sub>3</sub> .....                 | 37        |
| Figure S9.3 HSQC spectrum (600 MHz) of compound <b>12</b> in CDCl <sub>3</sub> .....                                | 38        |
| Figure S9.4 HMBC spectrum (600 MHz) of compound <b>12</b> in CDCl <sub>3</sub> .....                                | 38        |
| Figure S9.5 <sup>1</sup> H- <sup>1</sup> H COSY spectrum (600 MHz) of compound <b>12</b> in CDCl <sub>3</sub> ..... | 39        |
| Figure S9.6 NOESY spectrum (600 MHz) of compound <b>12</b> in CDCl <sub>3</sub> .....                               | 39        |
| Figure S9.7 HR-ESIMS spectrum of compound <b>12</b> . .....                                                         | 40        |
| Figure S9.8 IR spectrum of compound <b>12</b> . .....                                                               | 40        |
| <b>11. Spectra of compound 15a</b> . .....                                                                          | <b>40</b> |
| Figure S10.1 HR-ESIMS spectrum of compound <b>15a</b> . .....                                                       | 40        |
| <b>12. QM-NMR calculation</b> .....                                                                                 | <b>41</b> |
| Figure S11.1 Two possible configurations of compound <b>3</b> .....                                                 | 41        |
| Figure S11.2 Two possible configurations of compound <b>4</b> .....                                                 | 42        |
| Figure S11.3 Two possible configurations of compound <b>5</b> .....                                                 | 44        |
| <b>13. TDDFT-ECD calculation</b> .....                                                                              | <b>45</b> |

# 1. X-ray crystallographic analyses

**Table S1.** X-ray crystallographic data for **1**.

|                                             |                                                               |
|---------------------------------------------|---------------------------------------------------------------|
| Empirical formula                           | C <sub>44</sub> H <sub>68</sub> O <sub>6</sub>                |
| Formula weight                              | 692.98                                                        |
| Temperature/K                               | 100                                                           |
| Crystal system                              | monoclinic                                                    |
| Space group                                 | P2 <sub>1</sub>                                               |
| a/Å                                         | 10.6135(3)                                                    |
| b/Å                                         | 16.2226(5)                                                    |
| c/Å                                         | 11.8888(4)                                                    |
| α/°                                         | 90                                                            |
| β/°                                         | 92.695(2)                                                     |
| γ/°                                         | 90                                                            |
| Volume/Å <sup>3</sup>                       | 2044.73(11)                                                   |
| Z                                           | 2                                                             |
| ρ <sub>calc</sub> /cm <sup>3</sup>          | 1.126                                                         |
| μ/mm <sup>-1</sup>                          | 0.570                                                         |
| F(000)                                      | 760.0                                                         |
| Crystal size/mm <sup>3</sup>                | 0.11 × 0.05 × 0.04                                            |
| Radiation                                   | CuKα (λ = 1.54178)                                            |
| 2θ range for data collection/°              | 9.228 to 149.386                                              |
| Index ranges                                | -12 ≤ h ≤ 12, -19 ≤ k ≤ 19, -14 ≤ l ≤ 14                      |
| Reflections collected                       | 15315                                                         |
| Independent reflections                     | 7619 [R <sub>int</sub> = 0.0385, R <sub>sigma</sub> = 0.0475] |
| Data/restraints/parameters                  | 7619/1/461                                                    |
| Goodness-of-fit on F <sup>2</sup>           | 1.031                                                         |
| Final R indexes [I > 2σ (I)]                | R <sub>1</sub> = 0.0479, wR <sub>2</sub> = 0.1174             |
| Final R indexes [all data]                  | R <sub>1</sub> = 0.0523, wR <sub>2</sub> = 0.1215             |
| Largest diff. peak/hole / e Å <sup>-3</sup> | 0.89/-0.27                                                    |
| Flack parameter                             | 0.00(10)                                                      |

**Table S2.** X-ray crystallographic data for **15a**.

|                                             |                                                               |
|---------------------------------------------|---------------------------------------------------------------|
| Empirical formula                           | C <sub>20</sub> H <sub>36</sub> O <sub>4</sub>                |
| Formula weight                              | 340.49                                                        |
| Temperature/K                               | 100.0                                                         |
| Crystal system                              | tetragonal                                                    |
| Space group                                 | I4                                                            |
| a/Å                                         | 14.6887(3)                                                    |
| b/Å                                         | 14.6887(3)                                                    |
| c/Å                                         | 37.2232(11)                                                   |
| α/°                                         | 90                                                            |
| β/°                                         | 90                                                            |
| γ/°                                         | 90                                                            |
| Volume/Å <sup>3</sup>                       | 8031.2(4)                                                     |
| Z                                           | 16                                                            |
| ρ <sub>calc</sub> /cm <sup>3</sup>          | 1.126                                                         |
| μ/mm <sup>-1</sup>                          | 0.605                                                         |
| F(000)                                      | 3008.0                                                        |
| Crystal size/mm <sup>3</sup>                | 0.15 × 0.08 × 0.05                                            |
| Radiation                                   | CuKα (λ = 1.54178)                                            |
| 2θ range for data collection/°              | 4.748 to 149.44                                               |
| Index ranges                                | -18 ≤ h ≤ 18, -18 ≤ k ≤ 18, -46 ≤ l ≤ 46                      |
| Reflections collected                       | 57940                                                         |
| Independent reflections                     | 8240 [R <sub>int</sub> = 0.0620, R <sub>sigma</sub> = 0.0327] |
| Data/restraints/parameters                  | 8240/15/462                                                   |
| Goodness-of-fit on F <sup>2</sup>           | 1.067                                                         |
| Final R indexes [I > 2σ (I)]                | R <sub>1</sub> = 0.0399, wR <sub>2</sub> = 0.1022             |
| Final R indexes [all data]                  | R <sub>1</sub> = 0.0431, wR <sub>2</sub> = 0.1051             |
| Largest diff. peak/hole / e Å <sup>-3</sup> | 0.23/-0.47                                                    |
| Flack parameter                             | 0.12(7)                                                       |

## 2. Spectra of compound 1

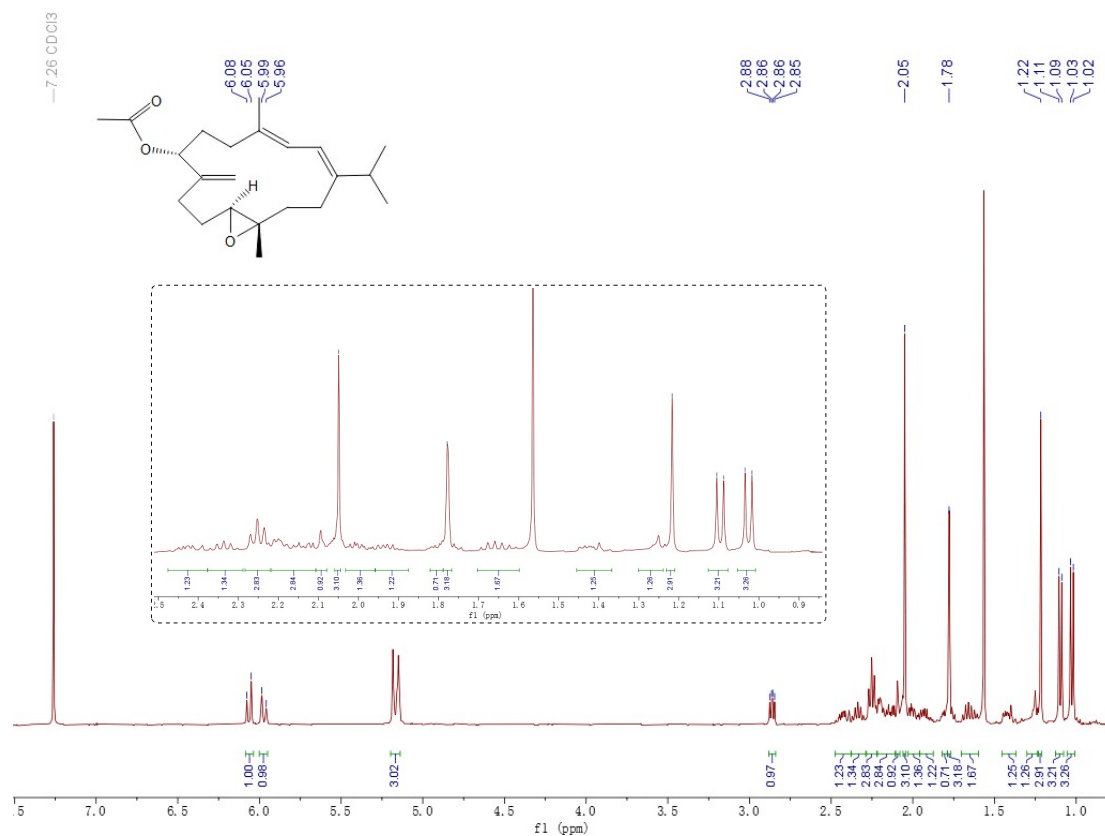

Figure S1.1.  $^1\text{H}$  NMR spectrum (600 MHz) of compound 1 in  $\text{CDCl}_3$ .

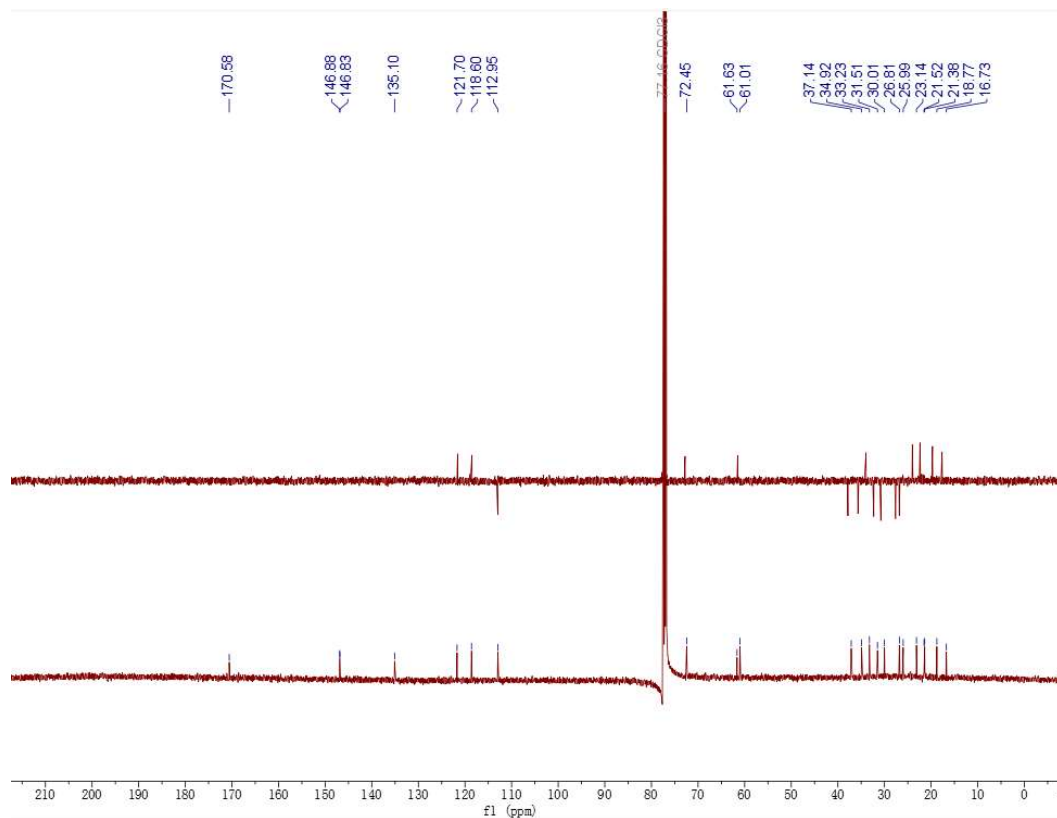

Figure S1.2.  $^{13}\text{C}$  NMR spectrum (150 MHz) of compound 1 in  $\text{CDCl}_3$ .

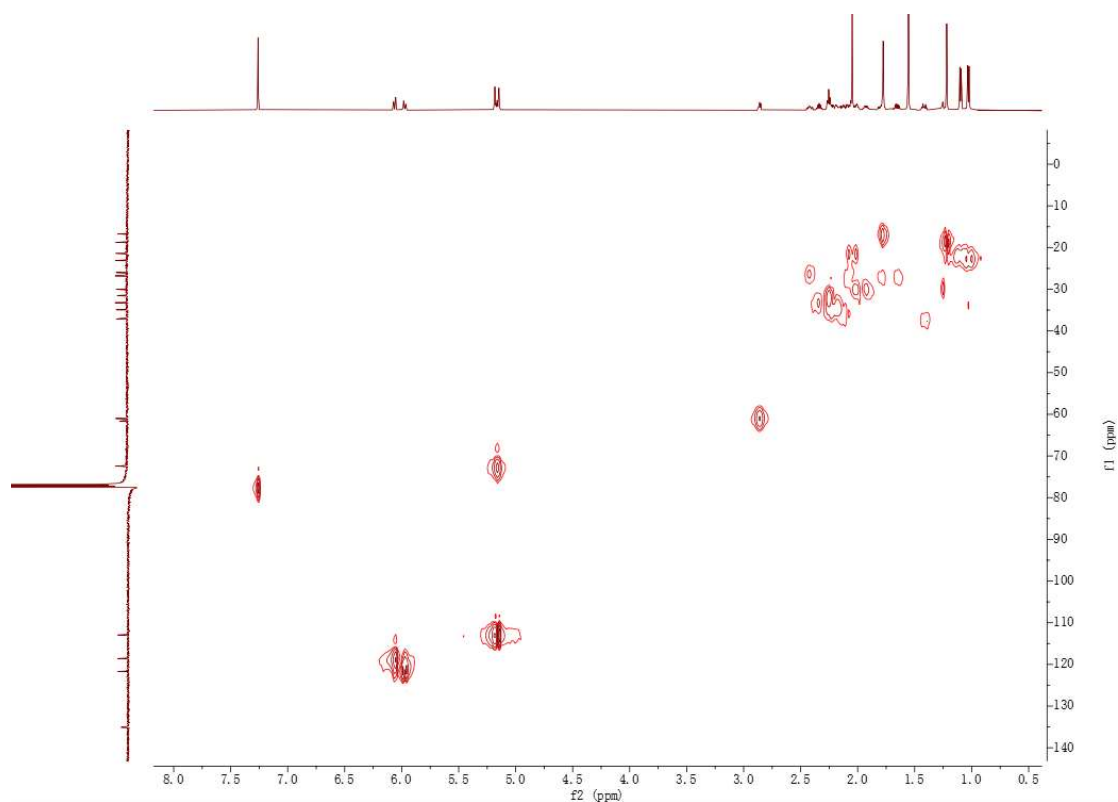

**Figure S1.3.** HSQC spectrum (600 MHz) of compound **1** in  $\text{CDCl}_3$ .

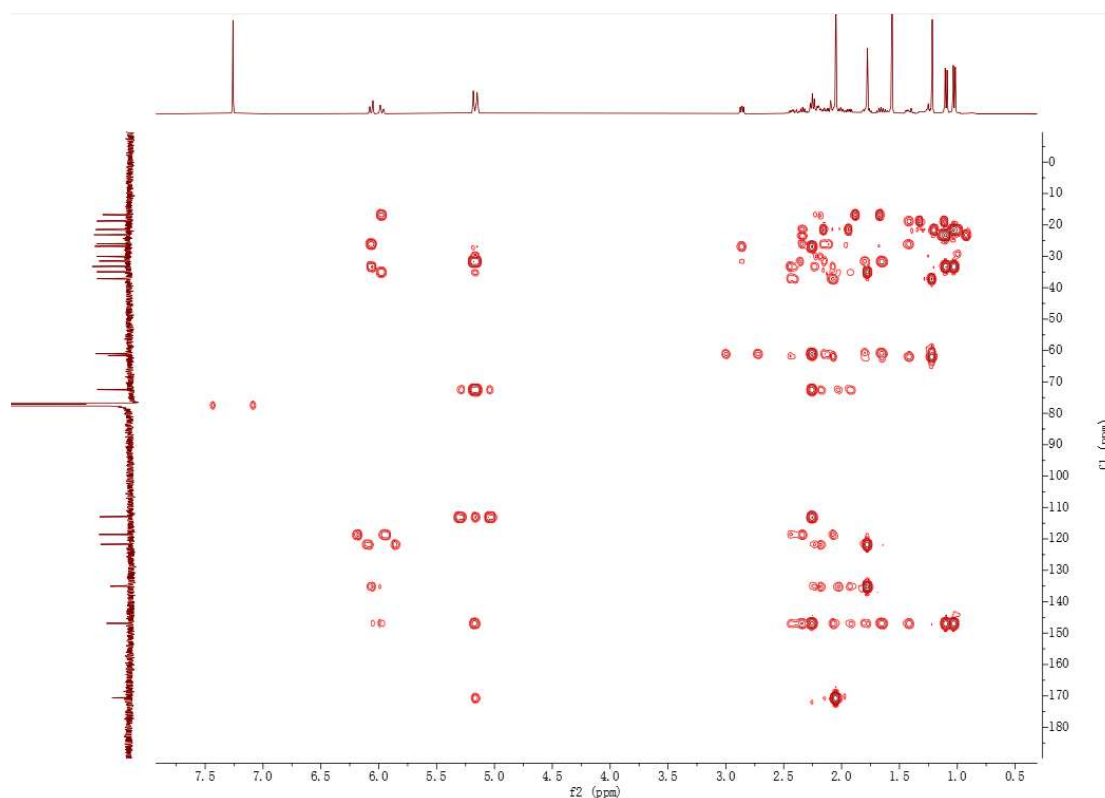

**Figure S1.4.** HMBC spectrum (600 MHz) of compound **1** in  $\text{CDCl}_3$ .

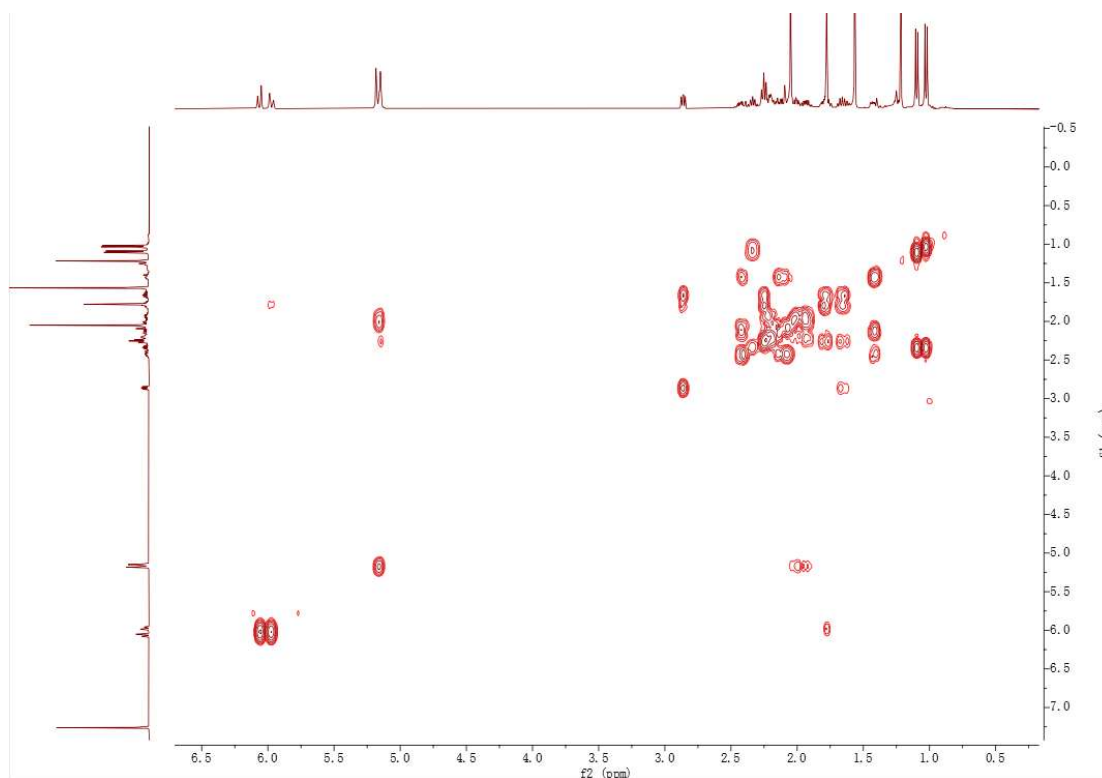

**Figure S1.5.**  $^1\text{H}$ - $^1\text{H}$  COSY spectrum (600 MHz) of compound **1** in  $\text{CDCl}_3$ .

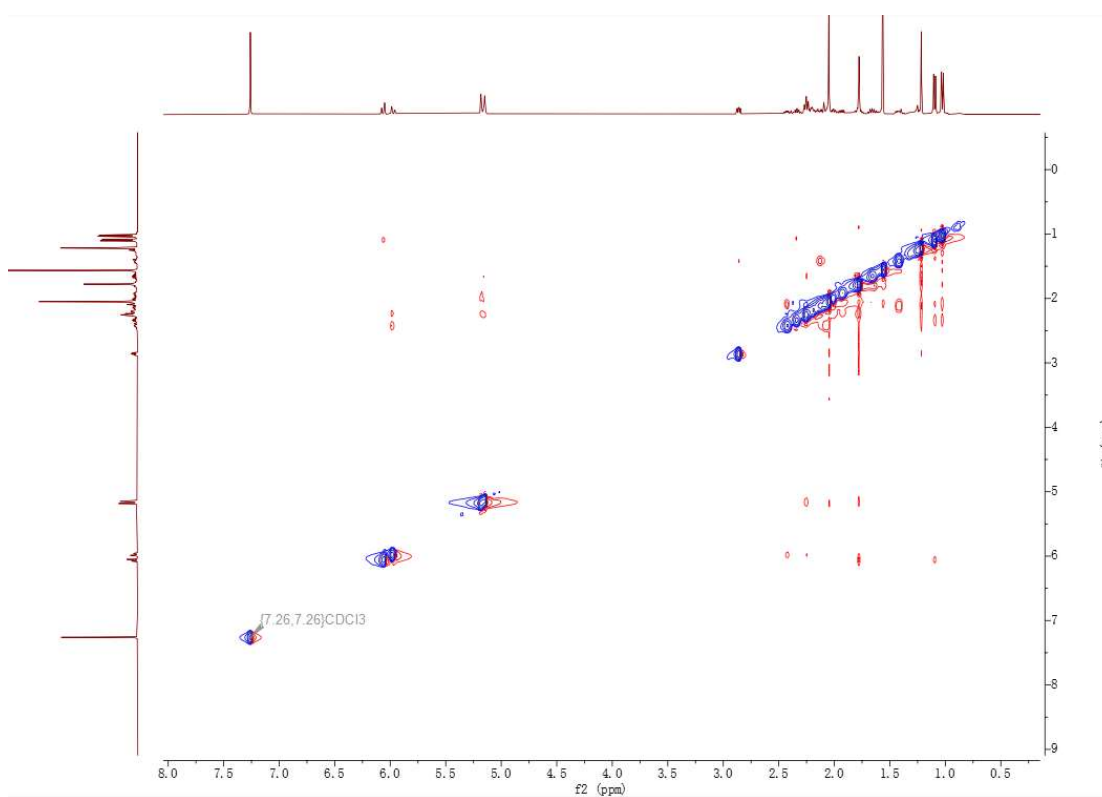

**Figure S1.6.** NOESY spectrum (600 MHz) of compound **1** in  $\text{CDCl}_3$ .



|                        |                                        |                               |                             |
|------------------------|----------------------------------------|-------------------------------|-----------------------------|
| <b>Data Filename</b>   | ESI202203897.d                         | <b>Sample Name</b>            | A8-Y2C13-3B                 |
| <b>Sample ID</b>       |                                        | <b>Position</b>               | P1-A8                       |
| <b>Instrument Name</b> | Agilent G6520 Q-TOF                    | <b>Acq Method</b>             | 20160322_MS_ESIH_POS_1min.m |
| <b>Acquired Time</b>   | 10/17/2022 13:26:41                    | <b>IRM Calibration Status</b> | Success                     |
| <b>DA Method</b>       | small molecular data analysis method.m | <b>Comment</b>                | ESI202203897.d              |

#### User Spectra

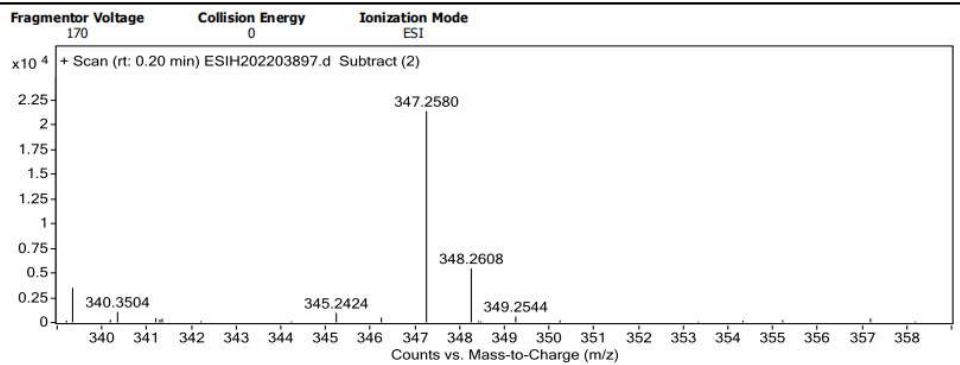

#### Formula Calculator Results

| m/z     | Calc m/z | Diff (mDa) | Diff (ppm) | Ion Formula | Ion    |
|---------|----------|------------|------------|-------------|--------|
| 347.258 | 347.2581 | 0.04       | 0.12       | C22 H35 O3  | (M+H)+ |

Figure S1.7. HR-ESIMS spectrum of compound 1.

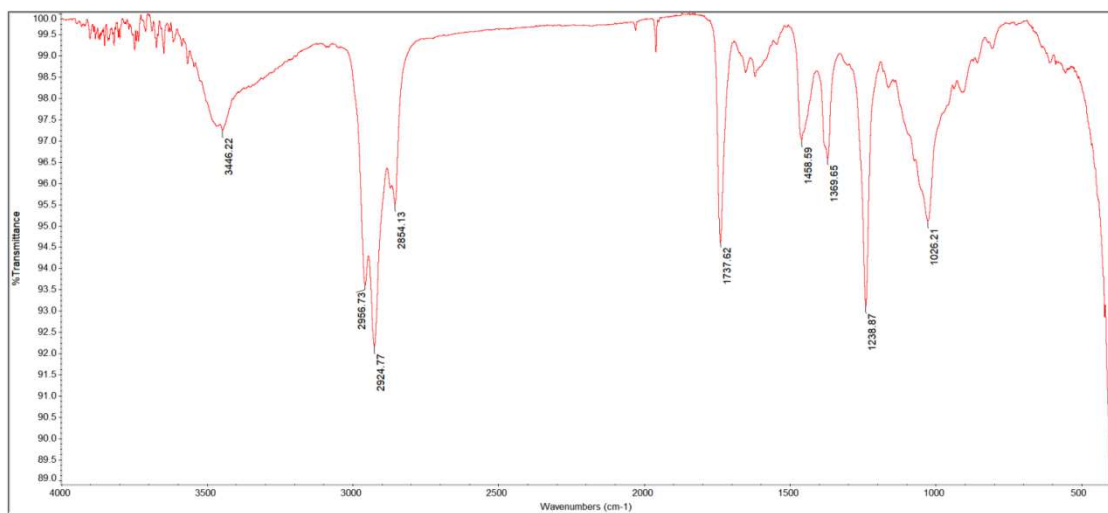

Figure S1.8. IR spectrum of compound 1.

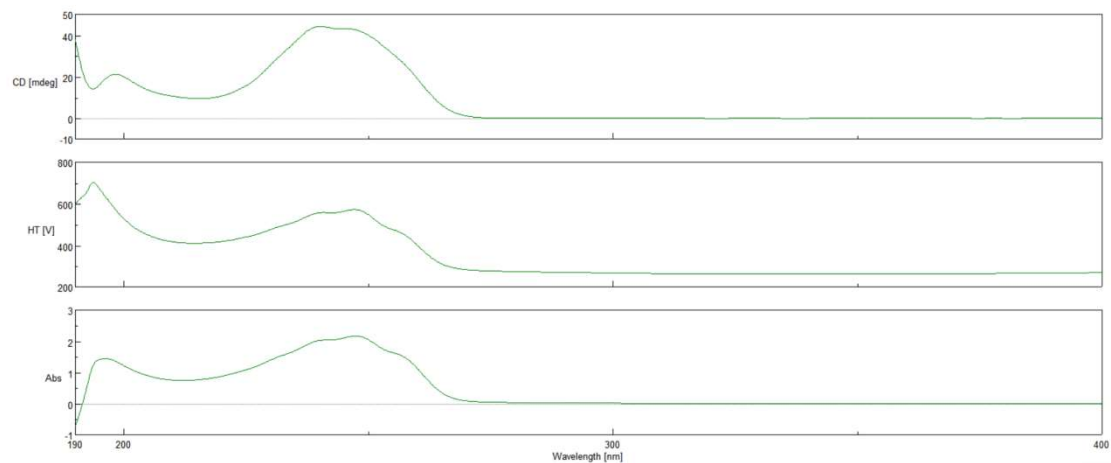

**Figure S1.9.** CD and UV spectra of compound **1**.

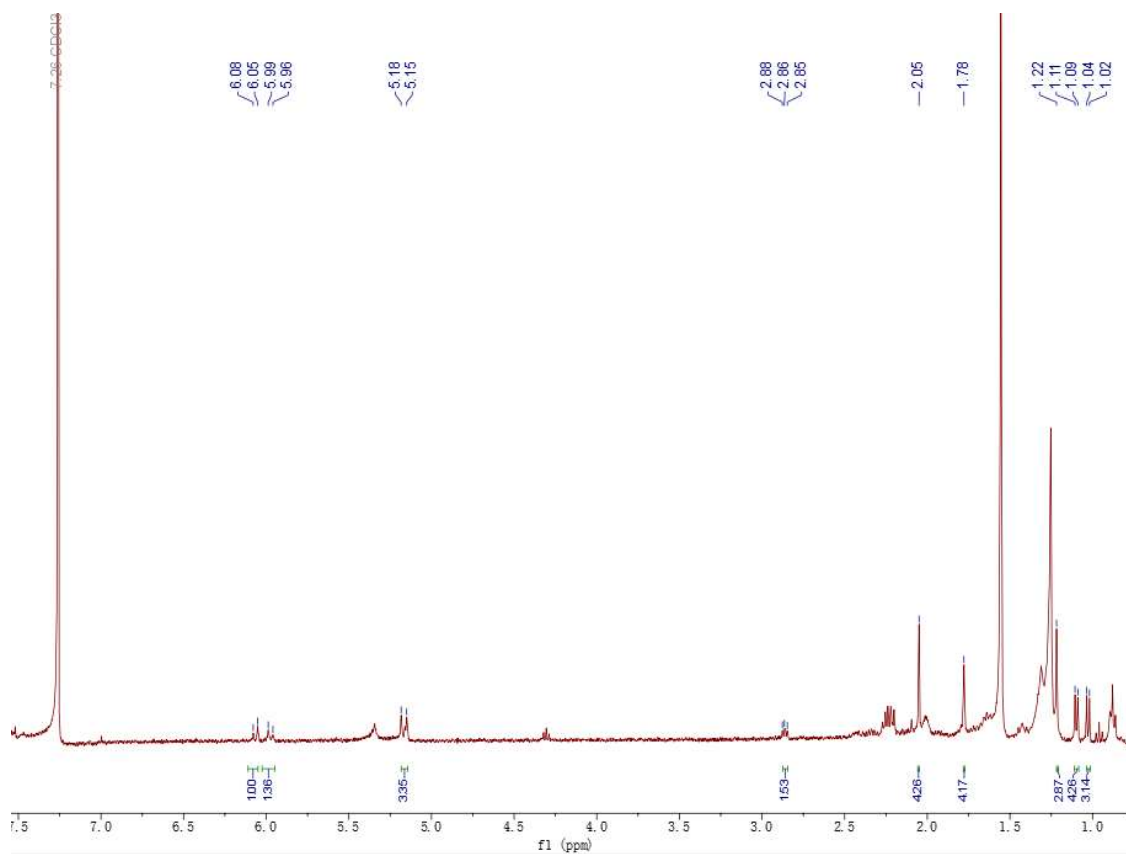

**Figure S1.10.**  $^1\text{H}$  NMR spectrum (400 MHz) of compound **1a** in  $\text{CDCl}_3$ .

### 3. Spectra of compound 2

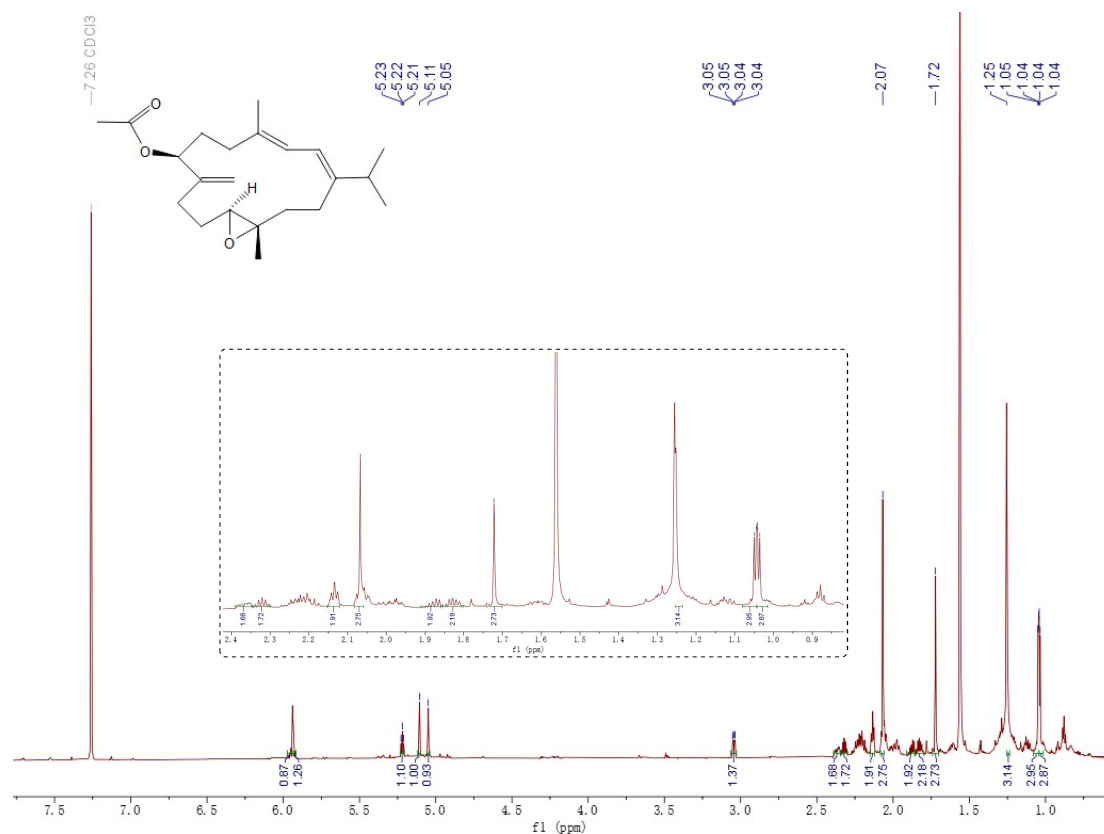

Figure S2.1. <sup>1</sup>H NMR spectrum (800 MHz) of compound 2 in CDCl<sub>3</sub>.

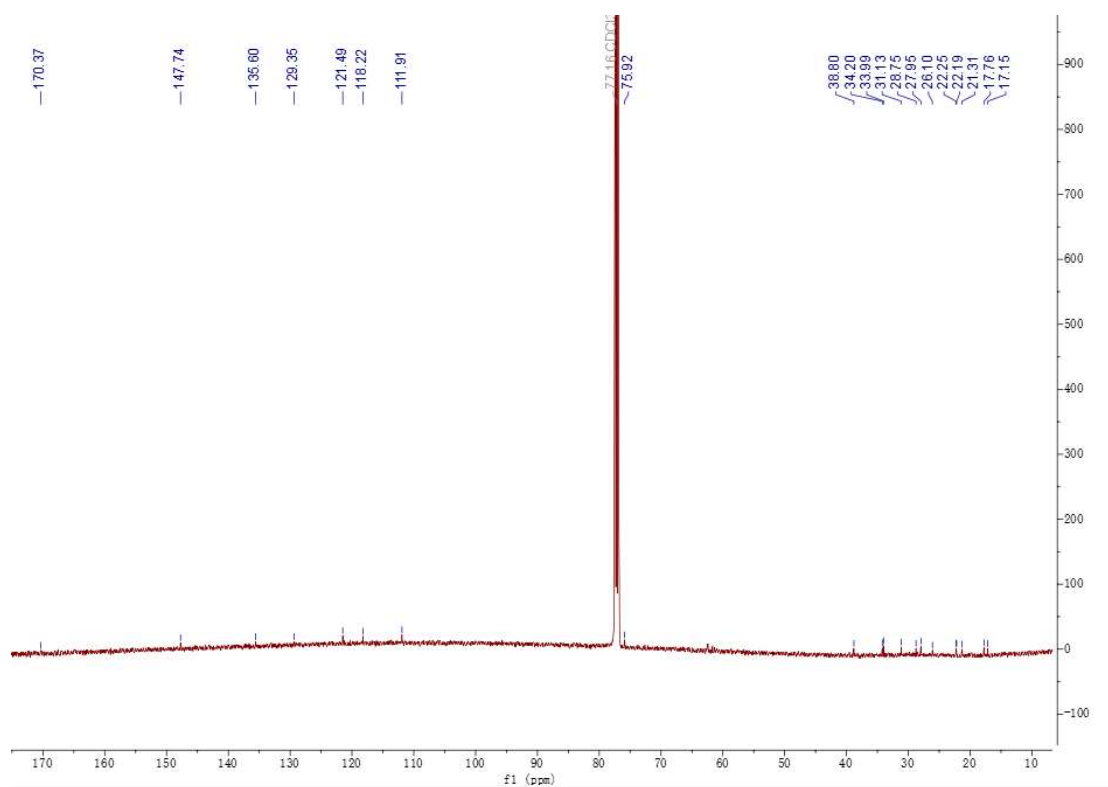

Figure S2.2. <sup>13</sup>C NMR spectrum (150 MHz) of compound 2 in CDCl<sub>3</sub>.

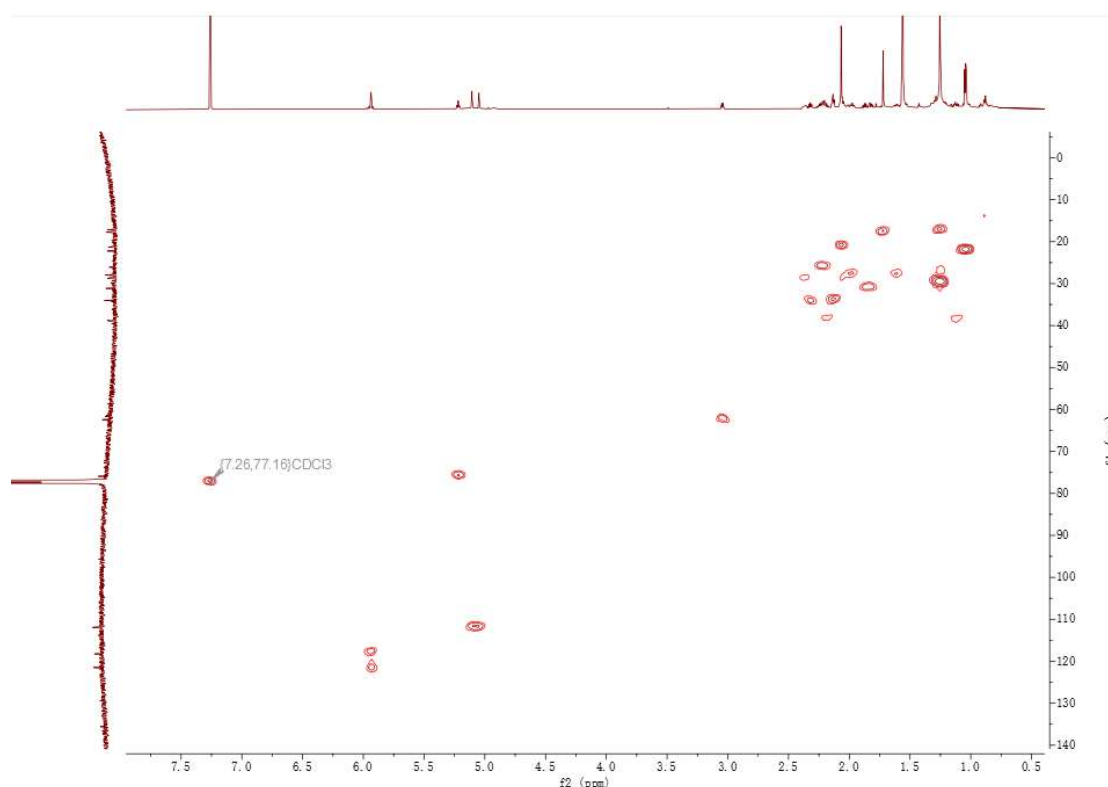

**Figure S2.3.** HSQC spectrum (800 MHz) of compound **2** in CDCl<sub>3</sub>.

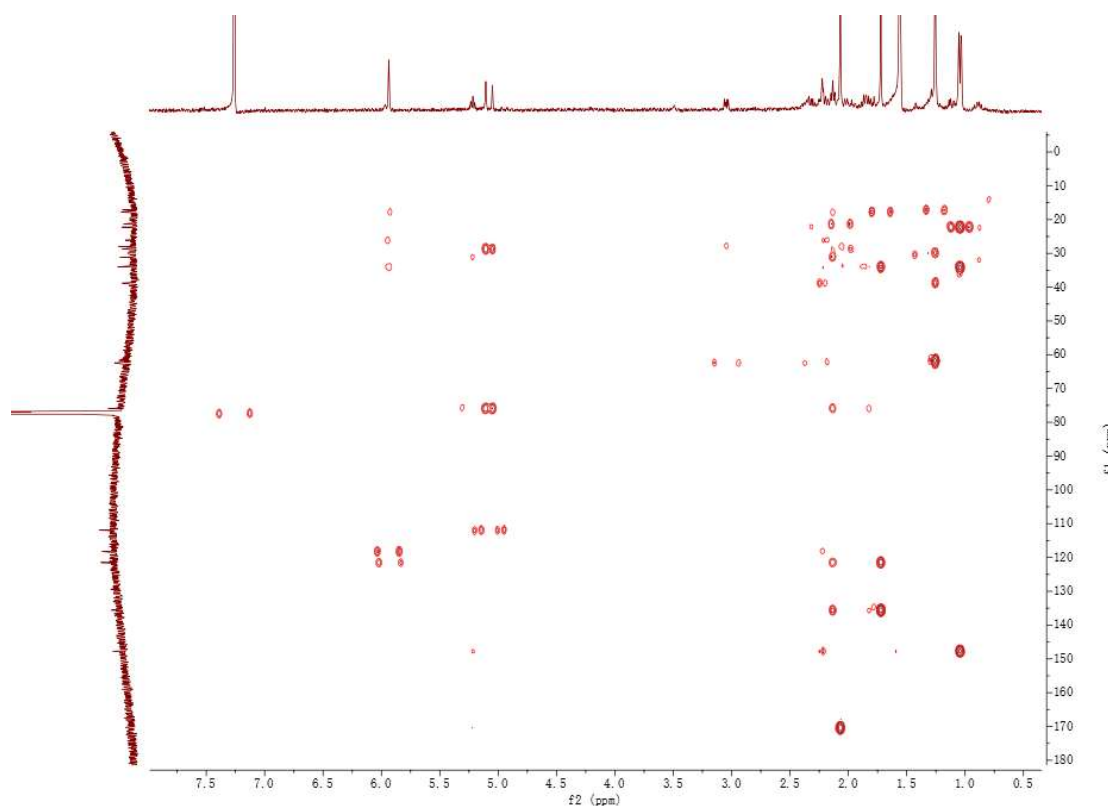

**Figure S2.4.** HMBC spectrum (800 MHz) of compound **2** in CDCl<sub>3</sub>.

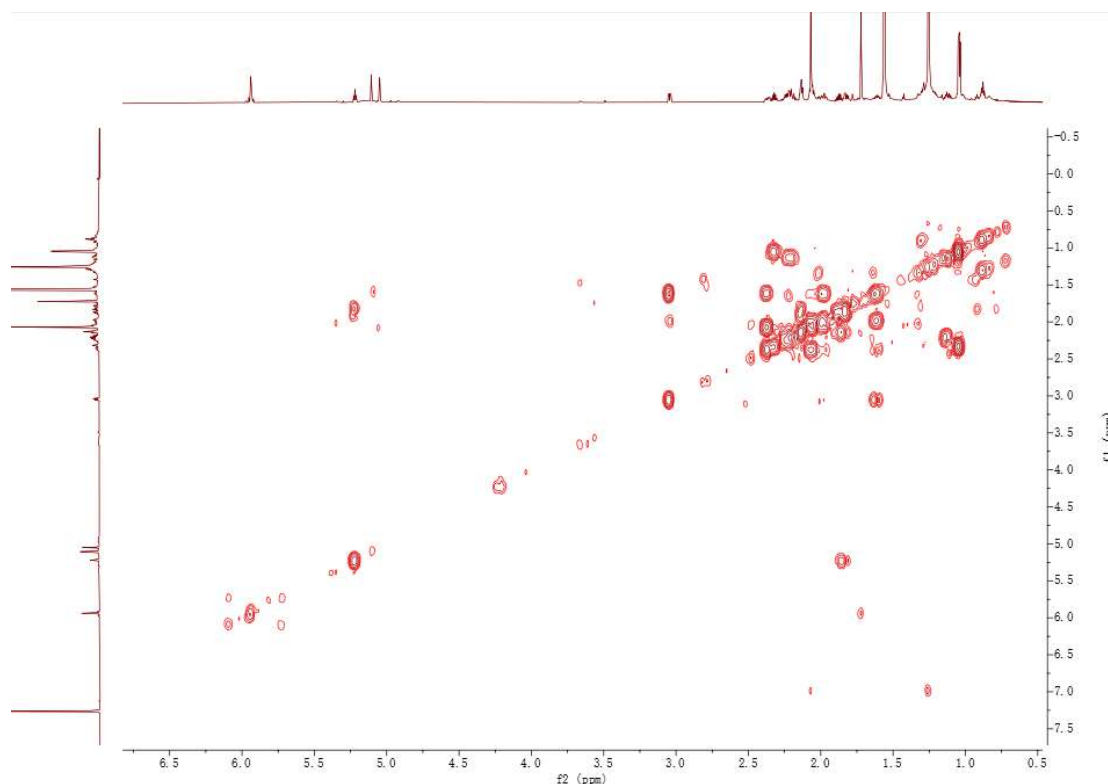

**Figure S2.5.**  $^1\text{H}$ - $^1\text{H}$  COSY spectrum (800 MHz) of compound **2** in  $\text{CDCl}_3$ .

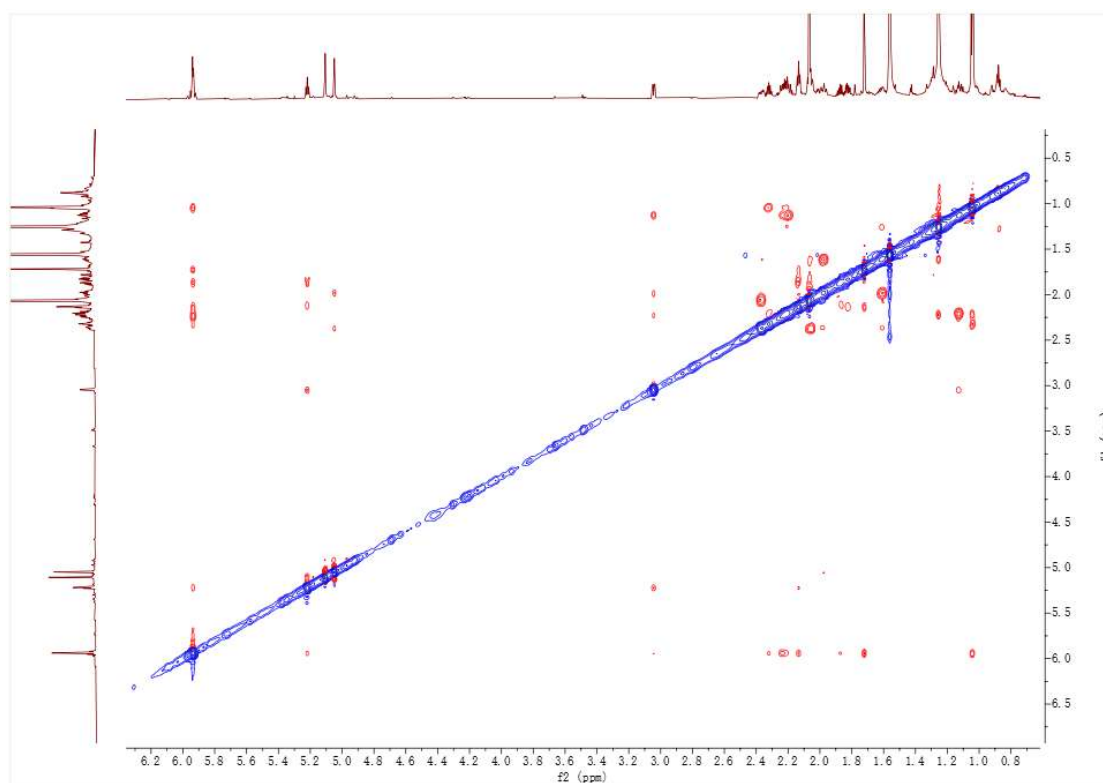

**Figure S2.6.** NOESY spectrum (800 MHz) of compound **2** in  $\text{CDCl}_3$ .

|                        |                                        |                               |                             |
|------------------------|----------------------------------------|-------------------------------|-----------------------------|
| <b>Data Filename</b>   | ESIH202204117.d                        | <b>Sample Name</b>            | A8-Y2C13-3C                 |
| <b>Sample ID</b>       |                                        | <b>Position</b>               | P1-A8                       |
| <b>Instrument Name</b> | Agilent G6520 Q-TOF                    | <b>Acq Method</b>             | 20160322_MS_ESIH_POS_1min.m |
| <b>Acquired Time</b>   | 10/24/2022 13:21:35                    | <b>IRM Calibration Status</b> | Success                     |
| <b>DA Method</b>       | small molecular data analysis method.m | <b>Comment</b>                | ESIH by fangsu              |

#### User Spectra

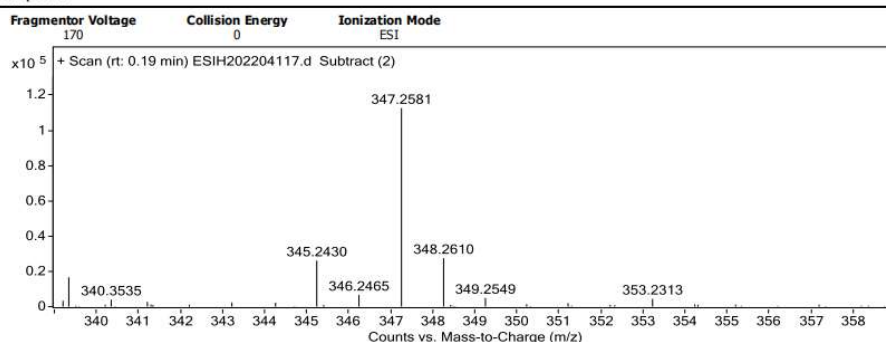

#### Formula Calculator Results

| m/z      | Calc m/z | Diff (mDa) | Diff (ppm) | Ion Formula | Ion    |
|----------|----------|------------|------------|-------------|--------|
| 347.2581 | 347.2581 | -0.04      | -0.12      | C22 H35 O3  | (M+H)+ |

**Figure S2.7.** HR-ESIMS spectrum of compound **2**.

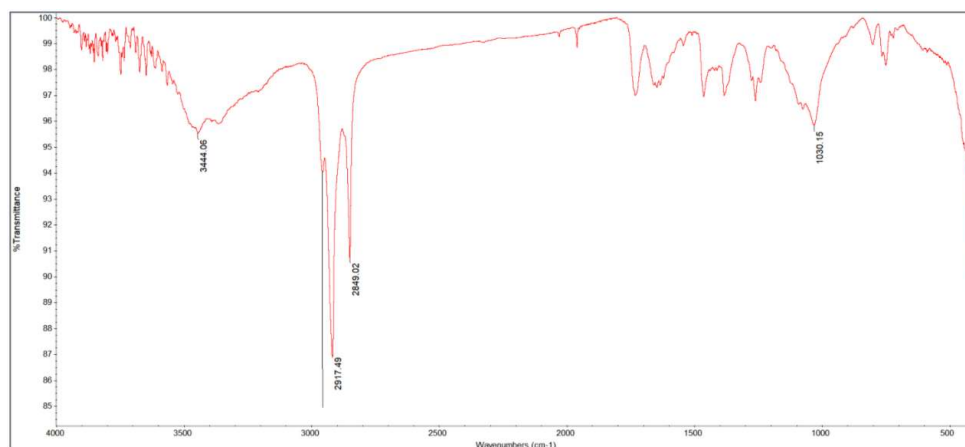

**Figure S2.8.** IR spectrum of compound **2**.

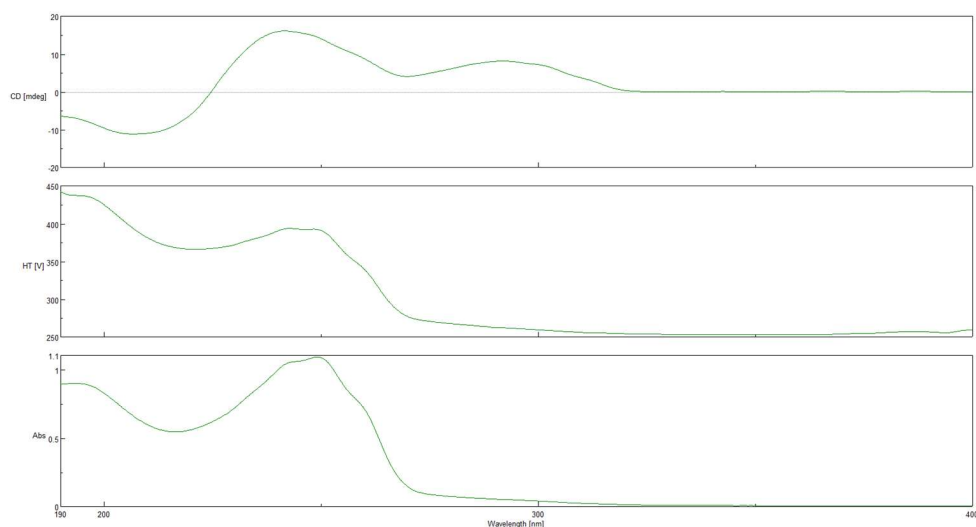

**Figure S2.9.** CD and UV spectra of compound **2**.

#### 4. Spectra of compound 3

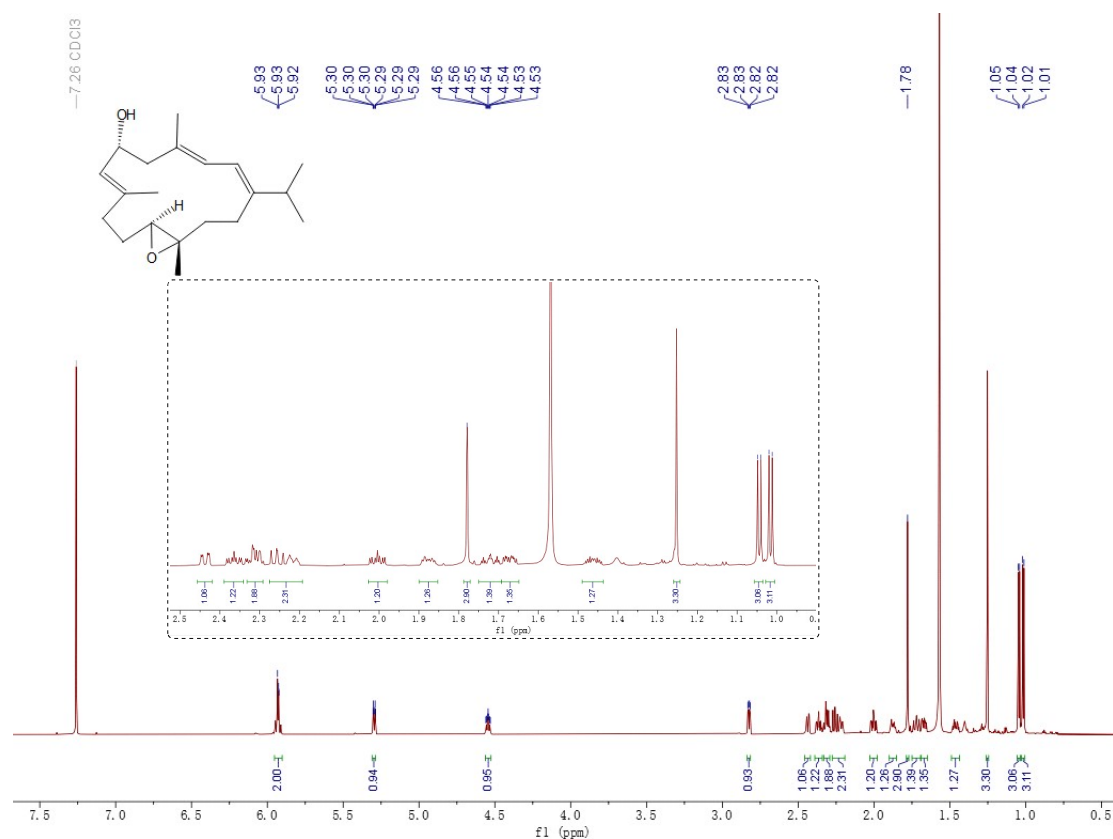

Figure S3.1. <sup>1</sup>H NMR spectrum (800 MHz) of compound 3 in CDCl<sub>3</sub>.

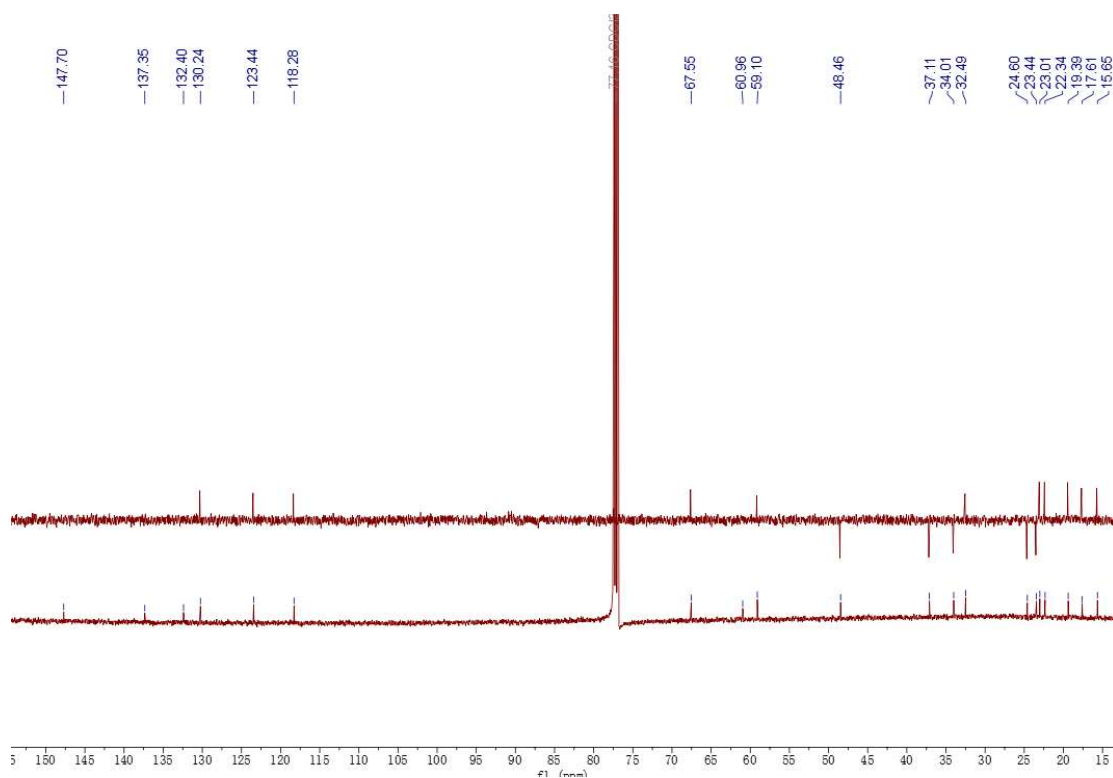

Figure S3.2. <sup>13</sup>C NMR spectrum (150 MHz) of compound 3 in CDCl<sub>3</sub>.

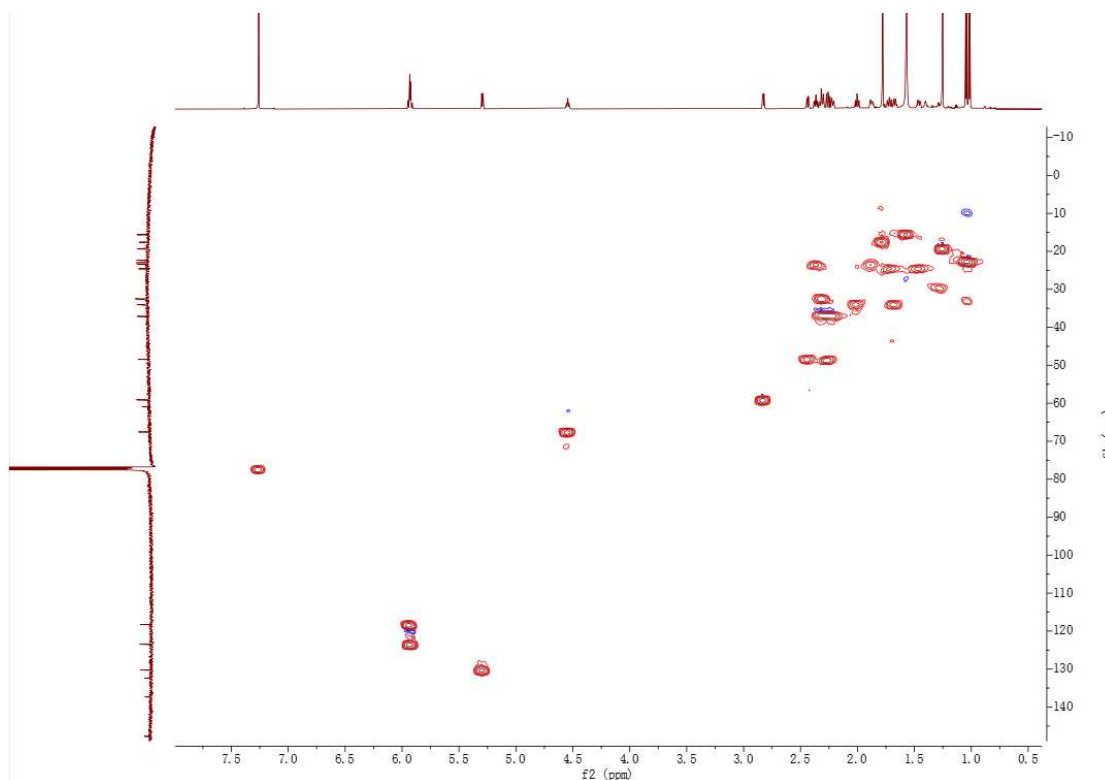

**Figure S3.3.** HSQC spectrum (800 MHz) of compound **3** in  $\text{CDCl}_3$ .

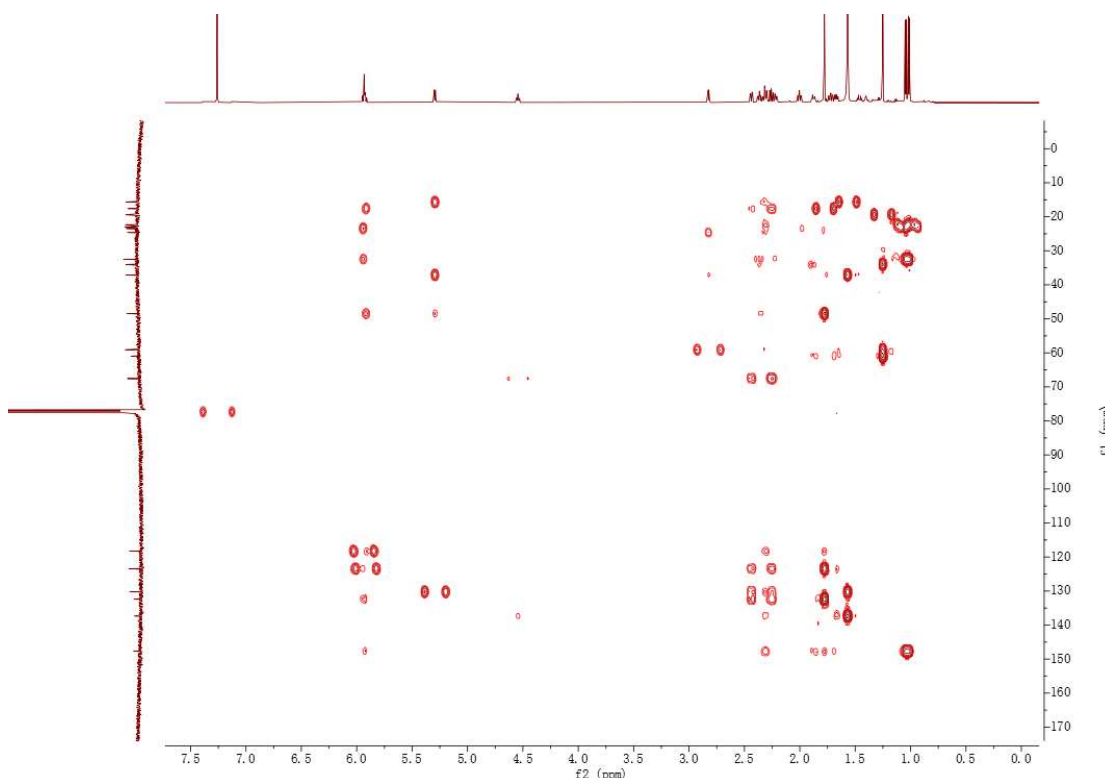

**Figure S3.4.** HMBC spectrum (800 MHz) of compound **3** in  $\text{CDCl}_3$ .



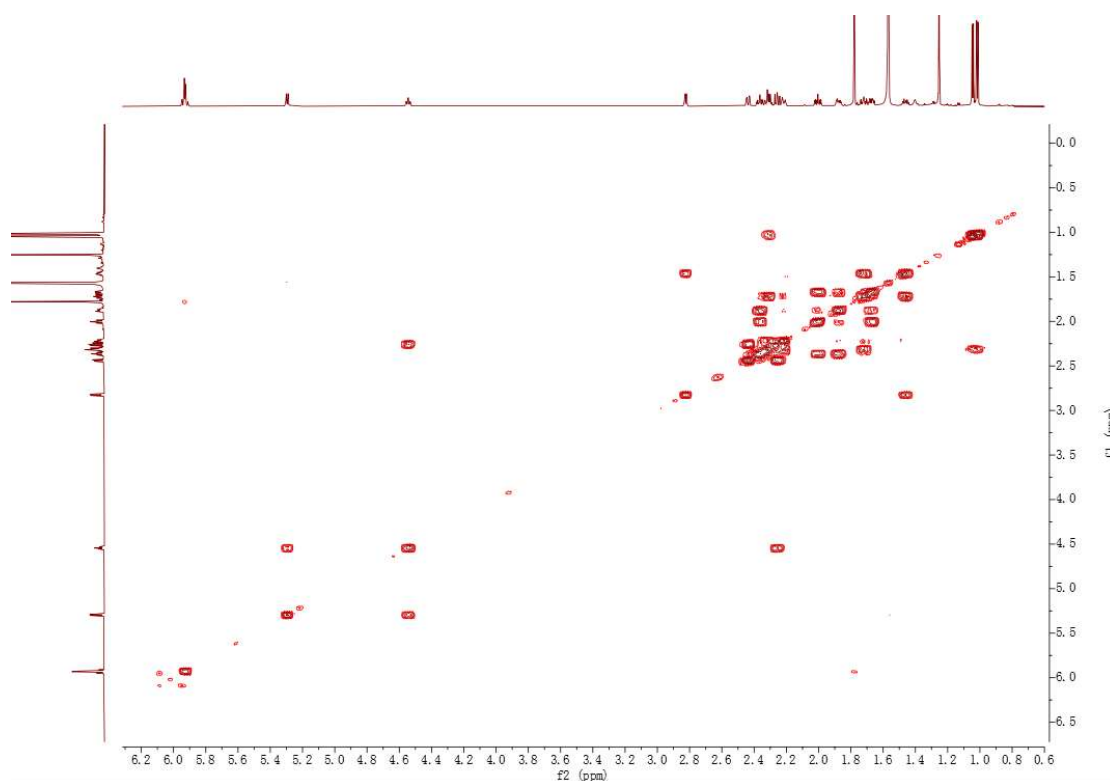

**Figure S3.5.**  $^1\text{H}$ - $^1\text{H}$  COSY spectrum (800 MHz) of compound **3** in  $\text{CDCl}_3$ .

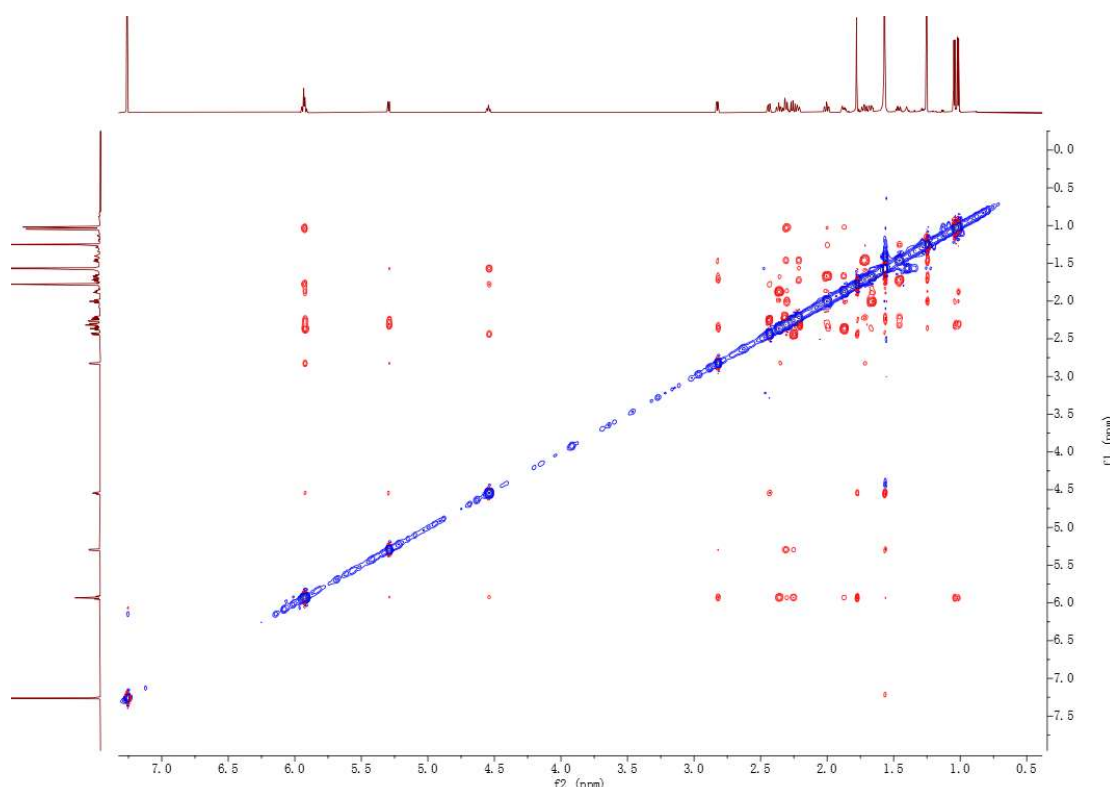

**Figure S3.6.** NOESY spectrum (800 MHz) of compound **3** in  $\text{CDCl}_3$ .

|                        |                                        |                               |                             |
|------------------------|----------------------------------------|-------------------------------|-----------------------------|
| <b>Data Filename</b>   | ESI202204626.d                         | <b>Sample Name</b>            | A8-Y6BA11                   |
| <b>Sample ID</b>       |                                        | <b>Position</b>               | P1-A5                       |
| <b>Instrument Name</b> | Agilent G6520 Q-TOF                    | <b>Acq Method</b>             | 20160322_MS_ESIH_POS_1min.m |
| <b>Acquired Time</b>   | 11/11/2022 14:29:05                    | <b>IRM Calibration Status</b> | Success                     |
| <b>DA Method</b>       | small molecular data analysis method.m | <b>Comment</b>                | ESIH by fangsu              |

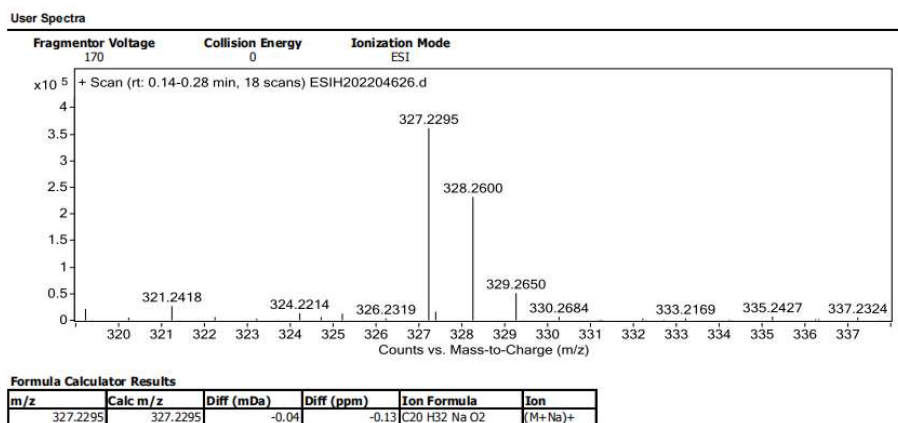

**Figure S3.7.** HR-ESIMS spectrum of compound **3**.

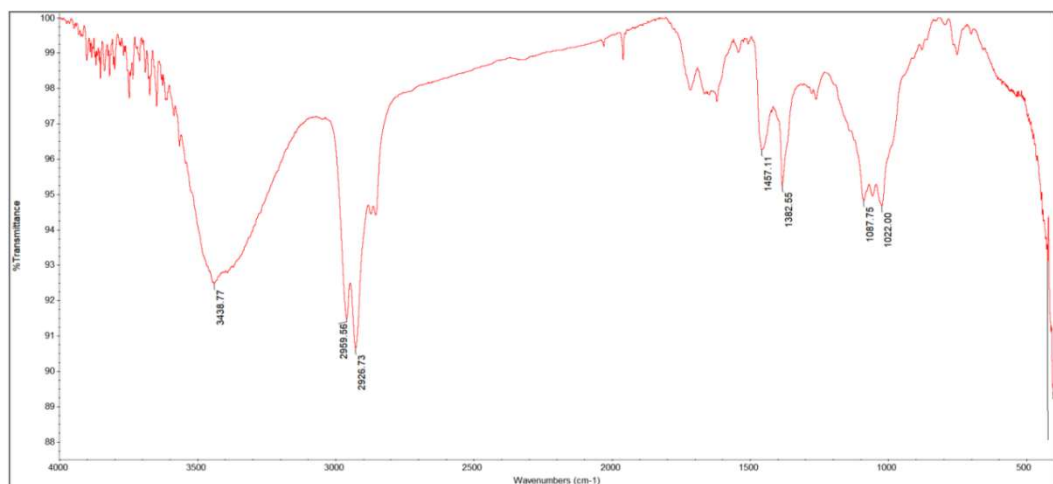

**Figure S3.8.** IR spectrum of compound **3**.

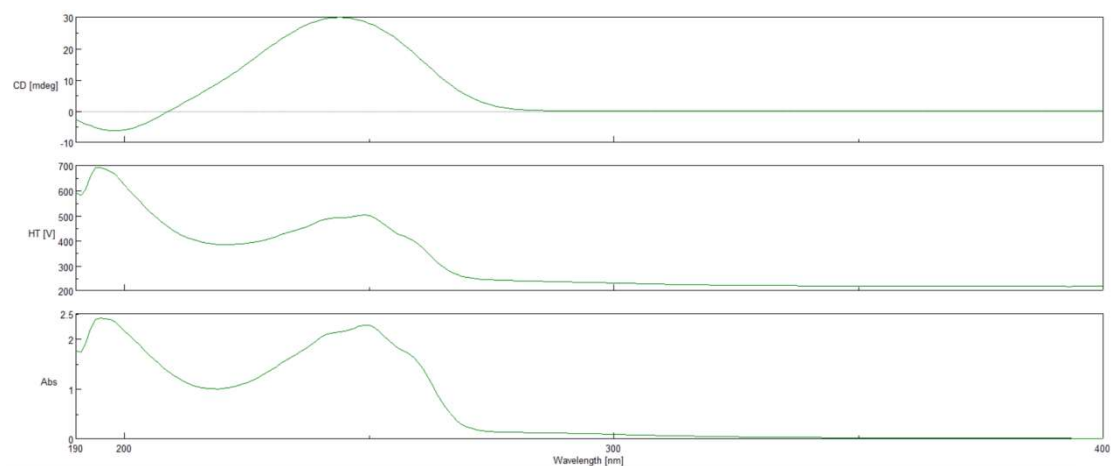

**Figure S3.9.** CD and UV spectrum of compound **3**.

## 5. Spectra of compound 4

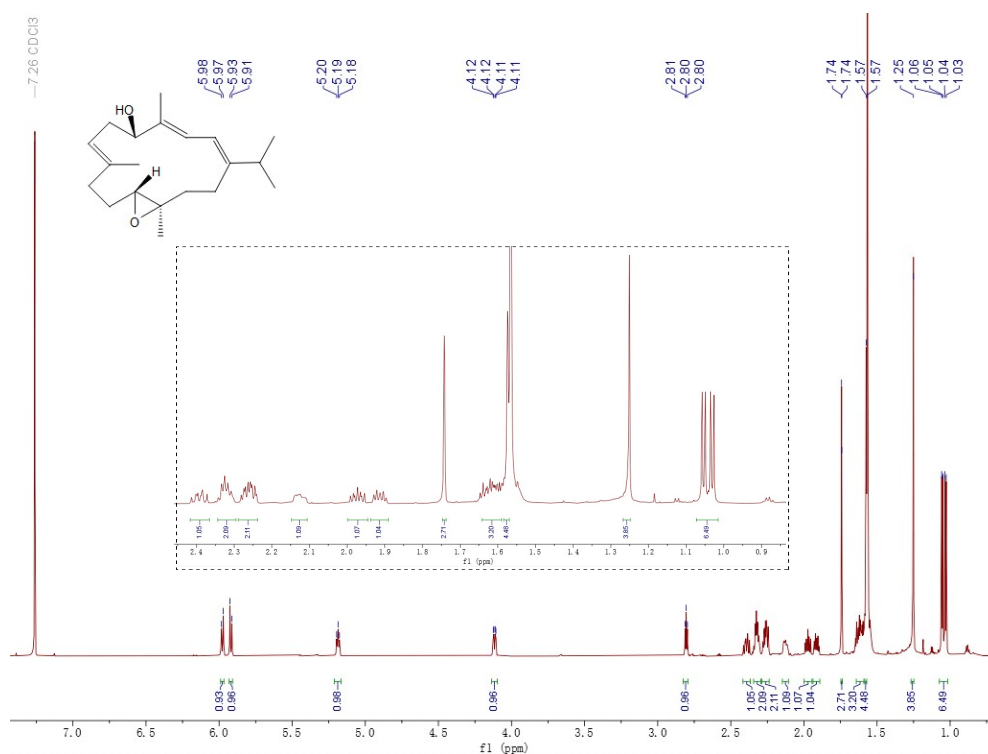

Figure S4.1. <sup>1</sup>H NMR spectrum (800 MHz) of compound 4 in CDCl<sub>3</sub>.

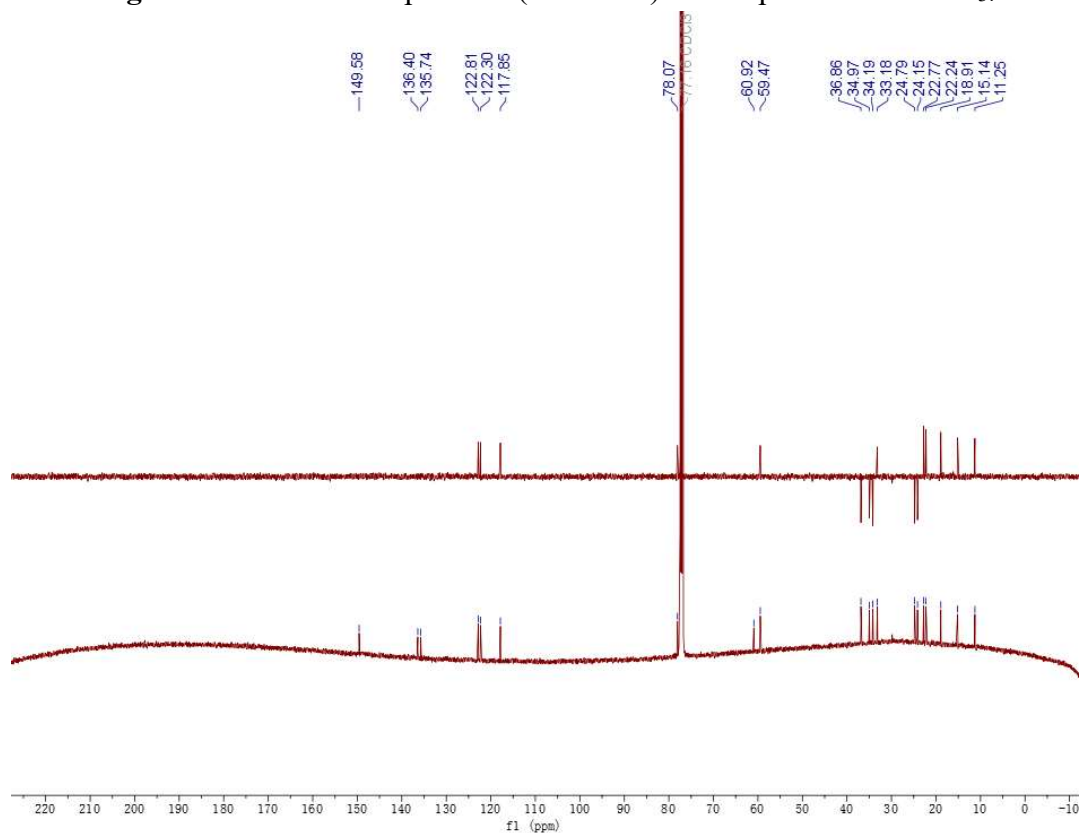

Figure S4.2. <sup>13</sup>C NMR spectrum (150 MHz) of compound 4 in CDCl<sub>3</sub>.

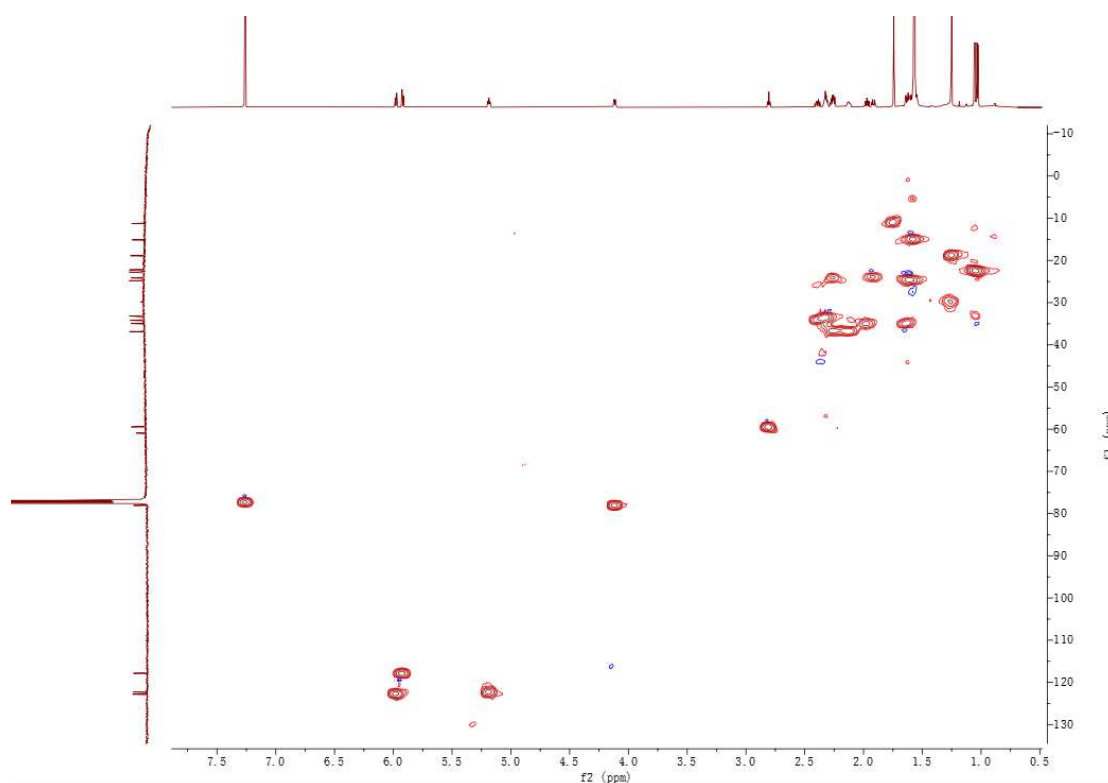

**Figure S4.3.** HSQC spectrum (800 MHz) of compound **4** in  $\text{CDCl}_3$ .

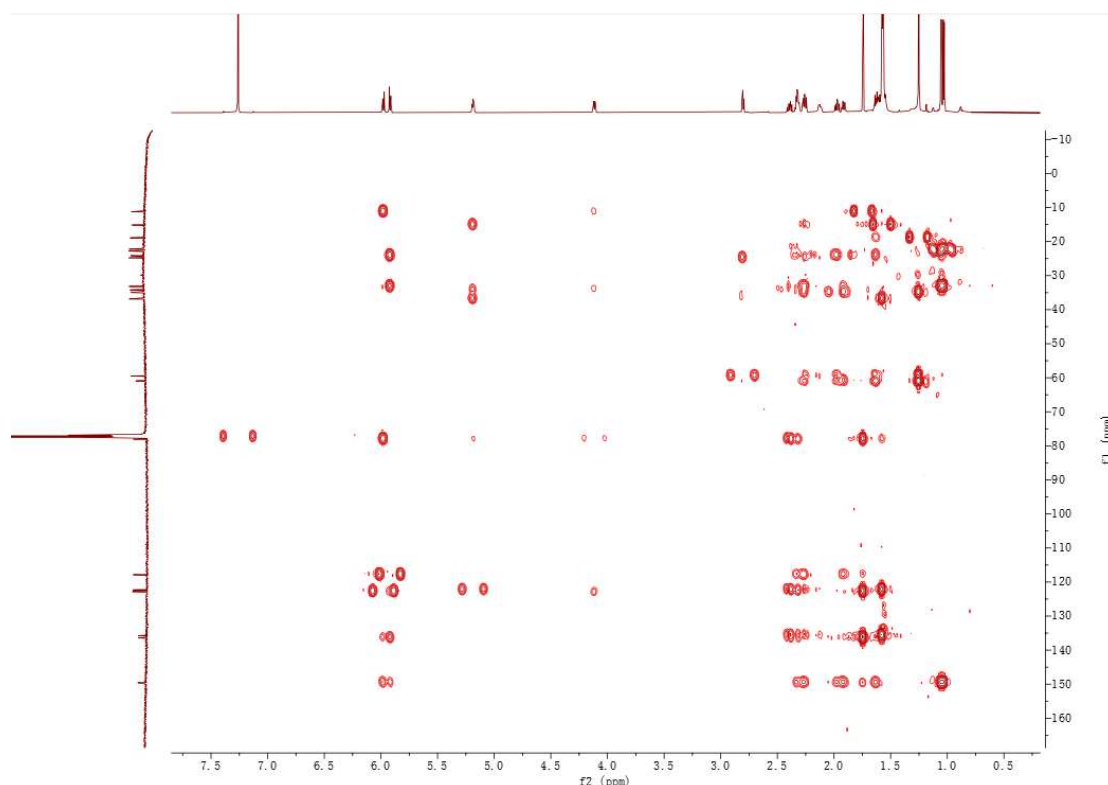

**Figure S4.4.** HMBC spectrum (800 MHz) of compound **4** in  $\text{CDCl}_3$ .

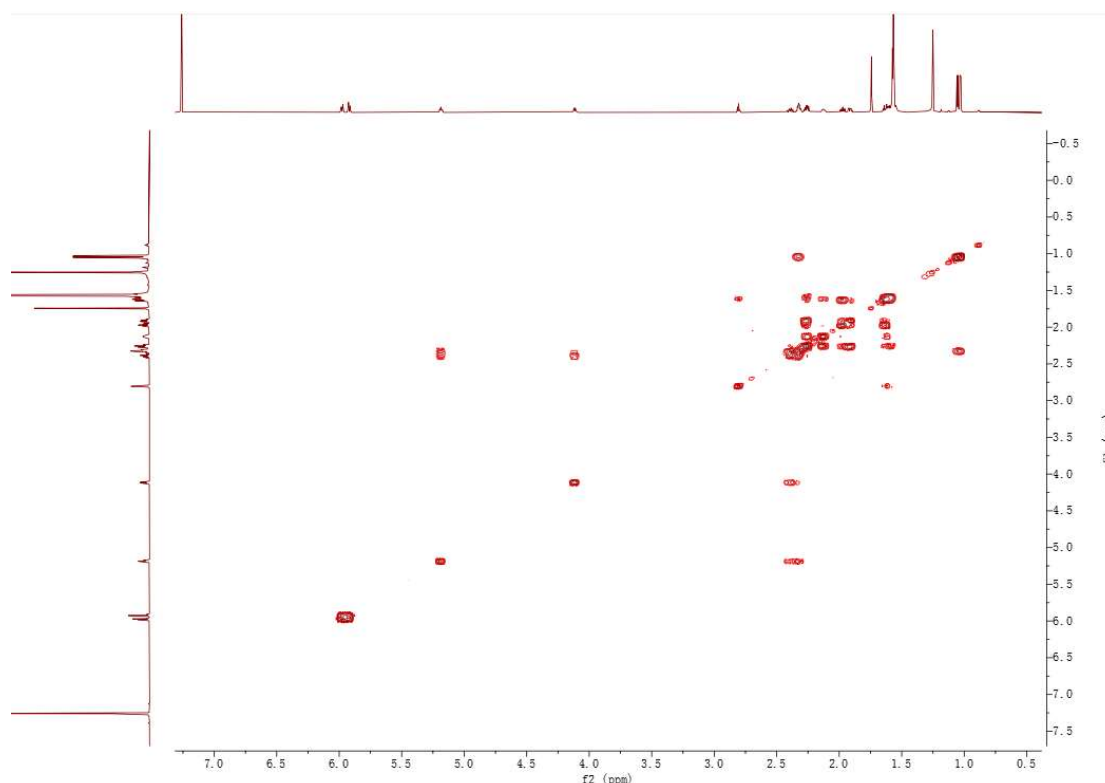

**Figure S4.5.**  $^1\text{H}$ - $^1\text{H}$  COSY spectrum (800 MHz) of compound **4** in  $\text{CDCl}_3$ .

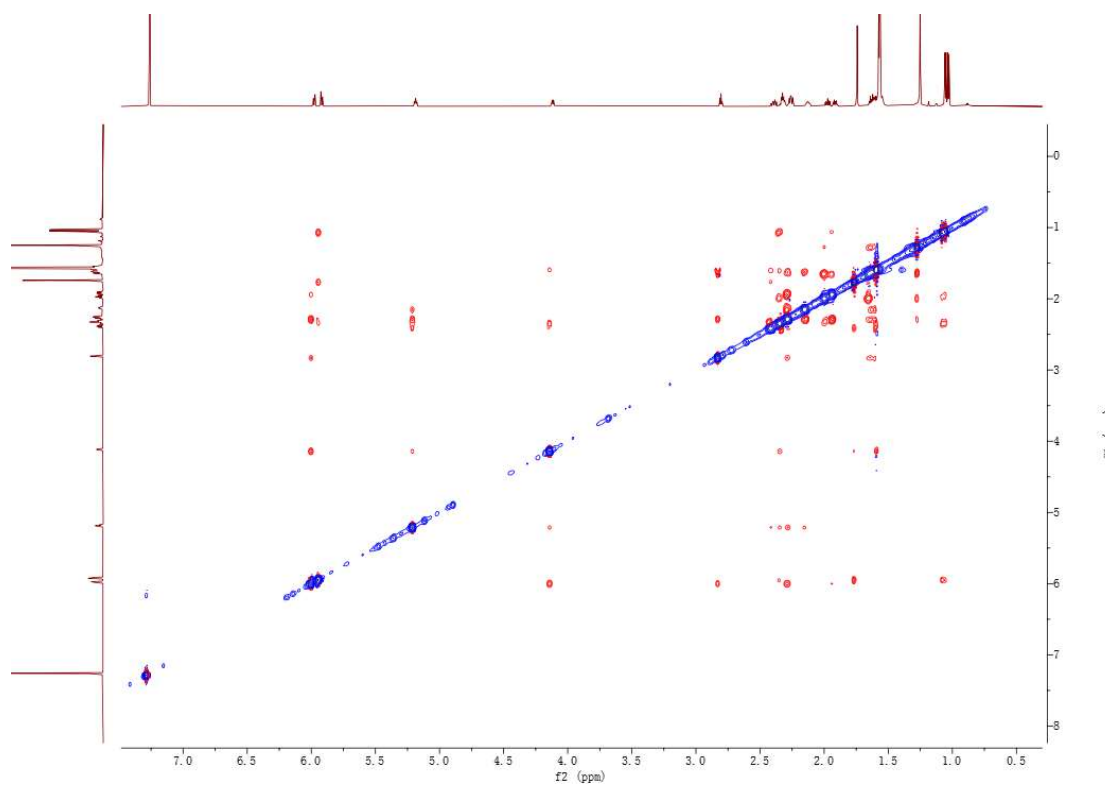

**Figure S4.6.** NOESY spectrum (800 MHz) of compound **4** in  $\text{CDCl}_3$ .

|                        |                                        |                               |                             |
|------------------------|----------------------------------------|-------------------------------|-----------------------------|
| <b>Data Filename</b>   | ESI202204627.d                         | <b>Sample Name</b>            | A8-Y6BA12                   |
| <b>Sample ID</b>       |                                        | <b>Position</b>               | P1-A6                       |
| <b>Instrument Name</b> | Agilent G6520 Q-TOF                    | <b>Acq Method</b>             | 20160322_MS_ESIH_POS_1min.m |
| <b>Acquired Time</b>   | 11/11/2022 14:30:22                    | <b>IRM Calibration Status</b> | Success                     |
| <b>DA Method</b>       | small molecular data analysis method.m | <b>Comment</b>                | ESI2 by fangsu              |

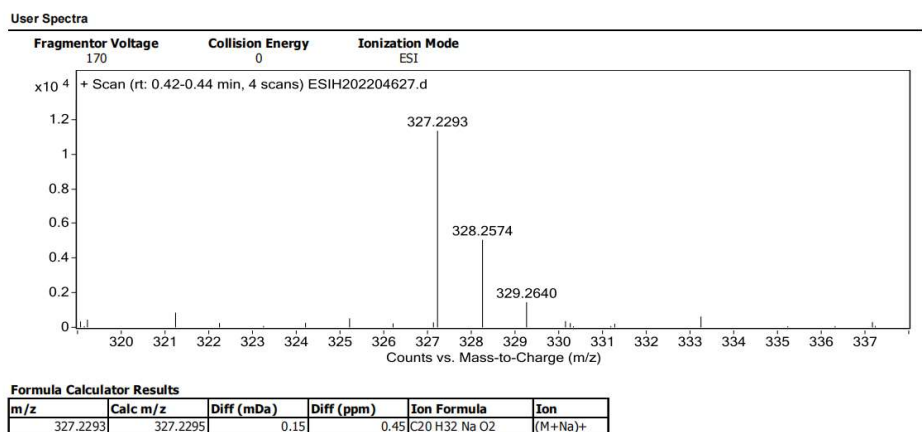

**Figure S4.7.** HR-ESIMS spectrum of compound **4**.

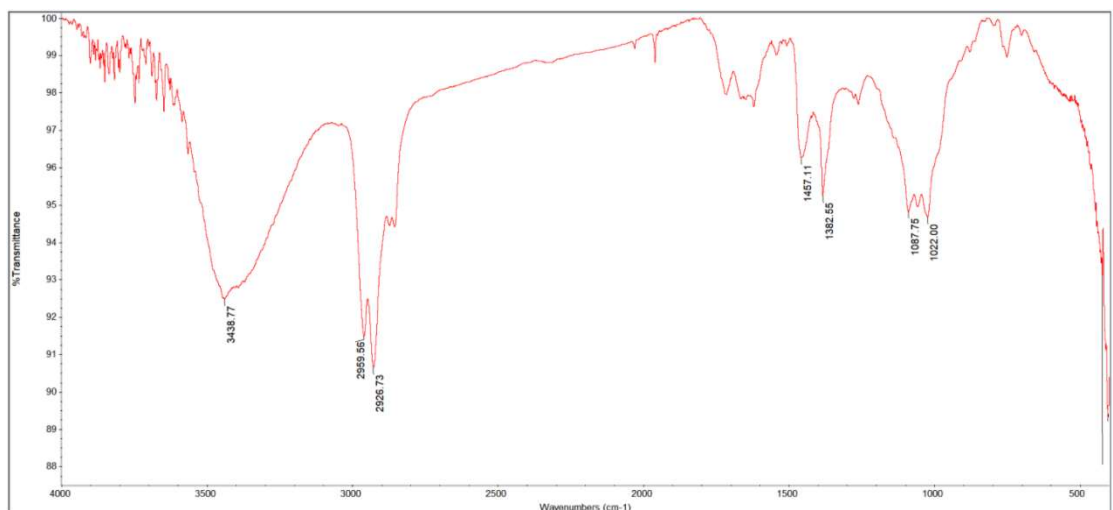

**Figure S4.8.** IR spectrum of compound **4**.

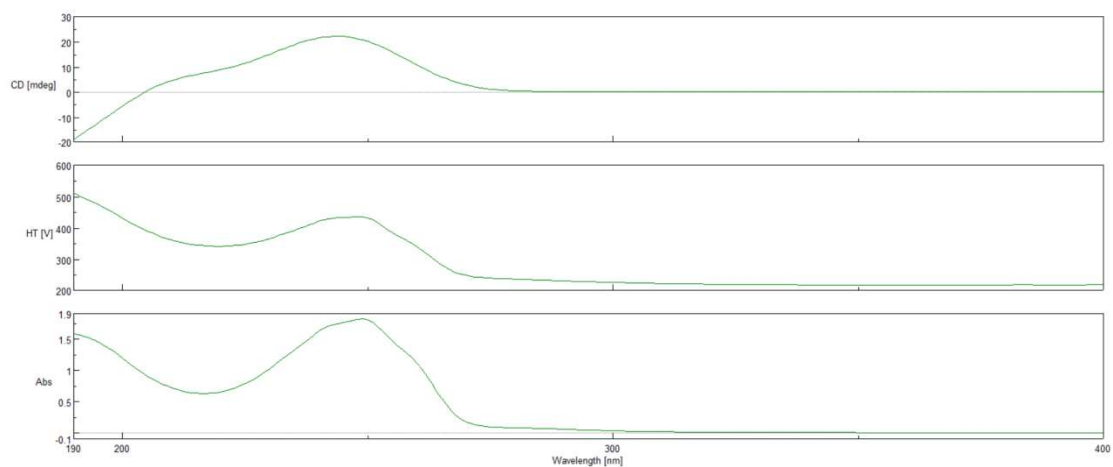

**Figure S4.9.** CD and UV spectrum of compound **4**.

## 6. Spectra of compound 5

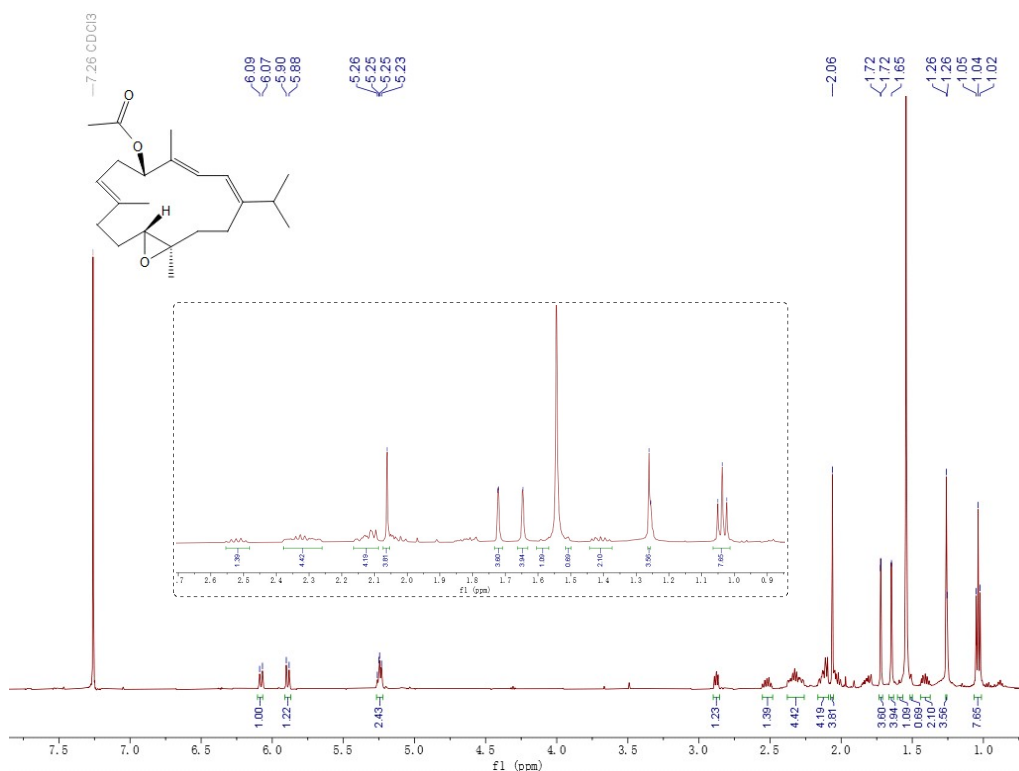

**Figure S5.1.**  $^1\text{H}$  NMR spectrum (600 MHz) of compound **5** in  $\text{CDCl}_3$ .

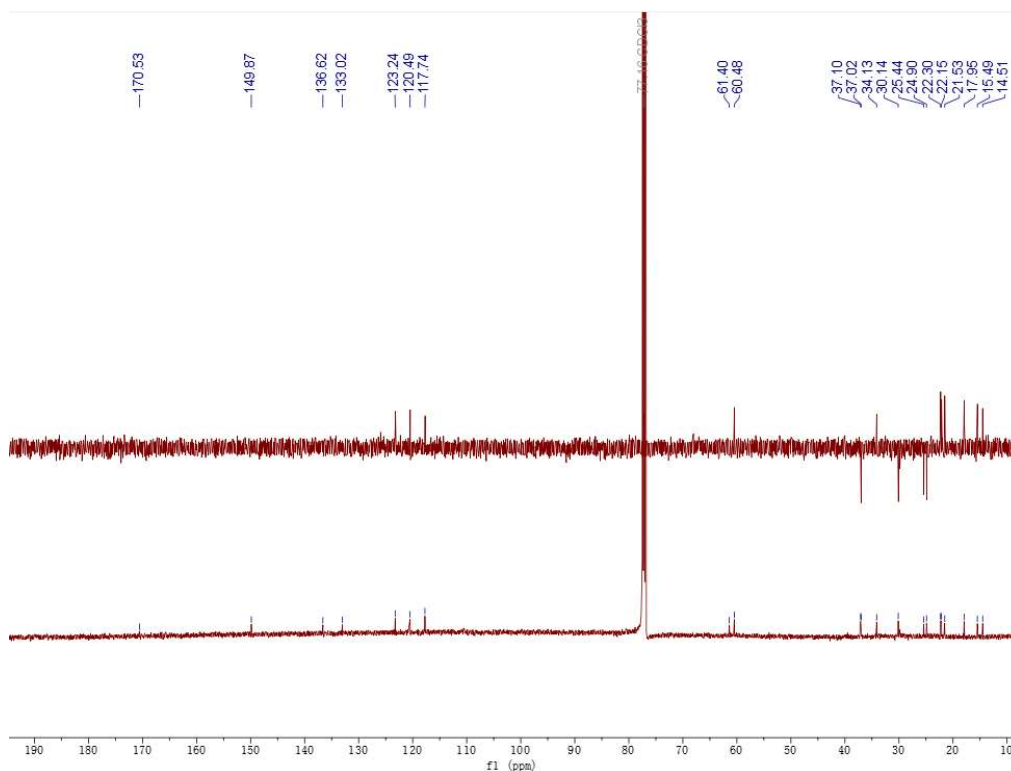

**Figure S5.2.**  $^{13}\text{C}$  NMR spectrum (150 MHz) of compound **5** in  $\text{CDCl}_3$ .

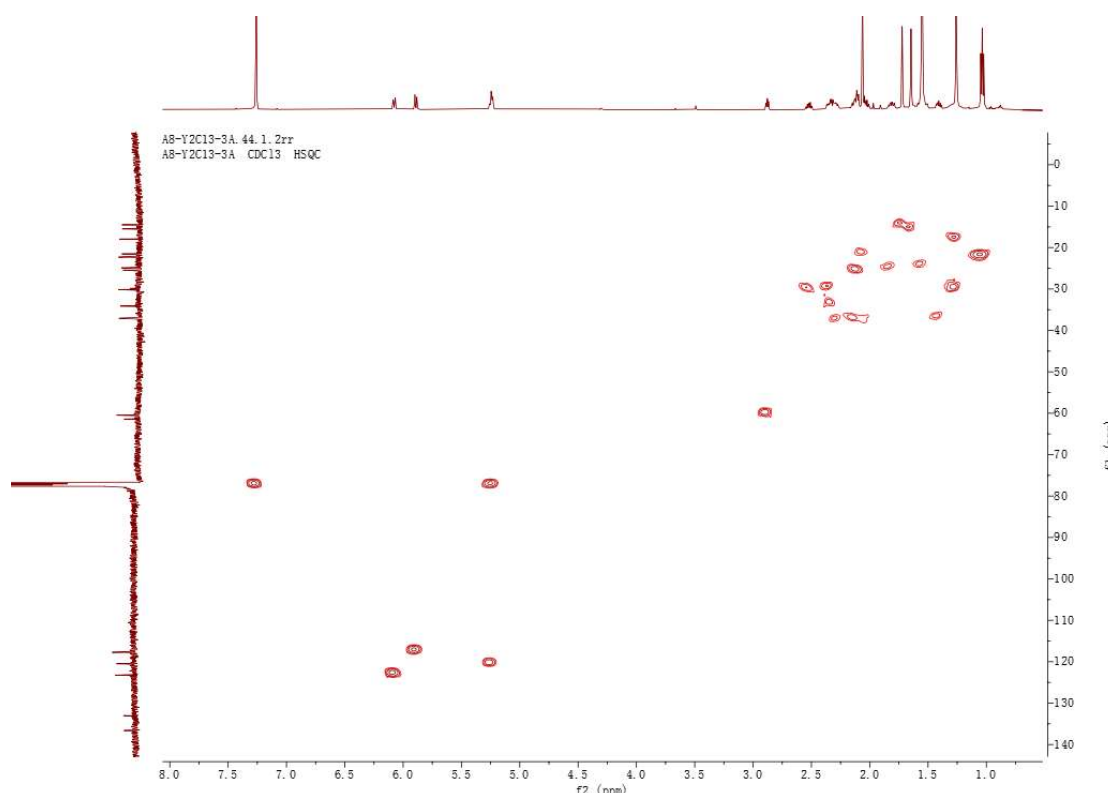

**Figure S5.3.** HSQC spectrum (600 MHz) of compound **5** in CDCl<sub>3</sub>.

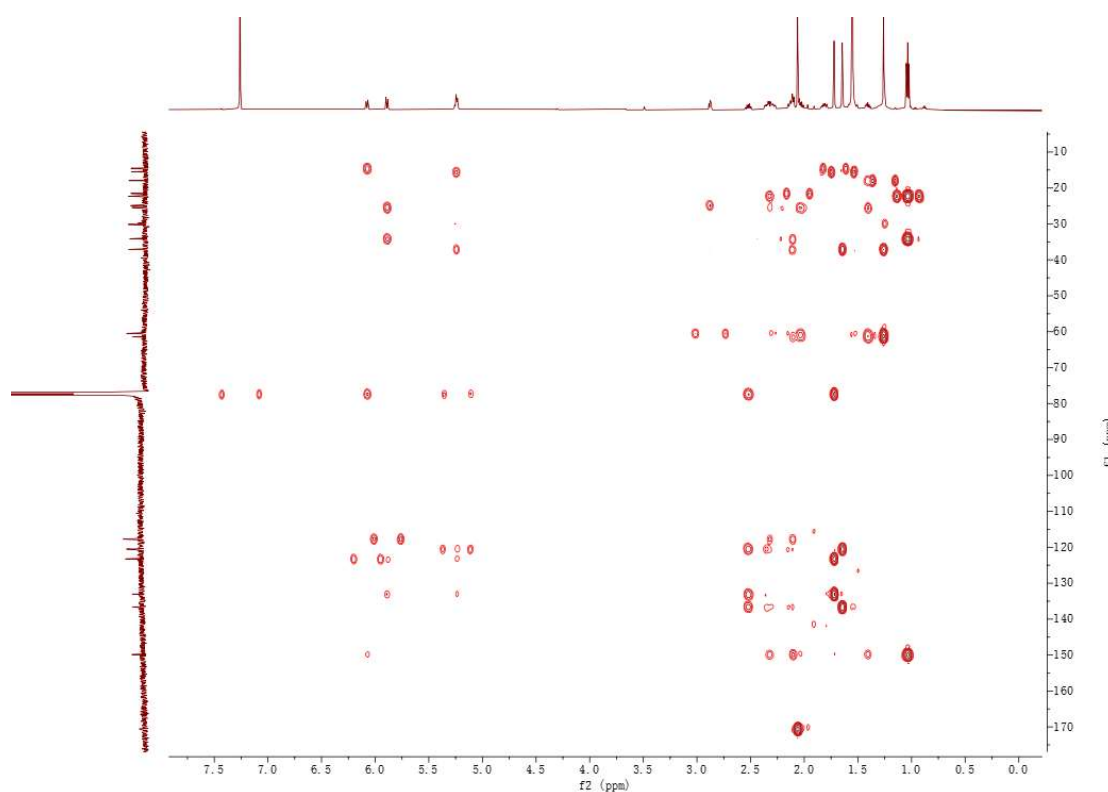

**Figure S5.4.** HMBC spectrum (600 MHz) of compound **5** in CDCl<sub>3</sub>.



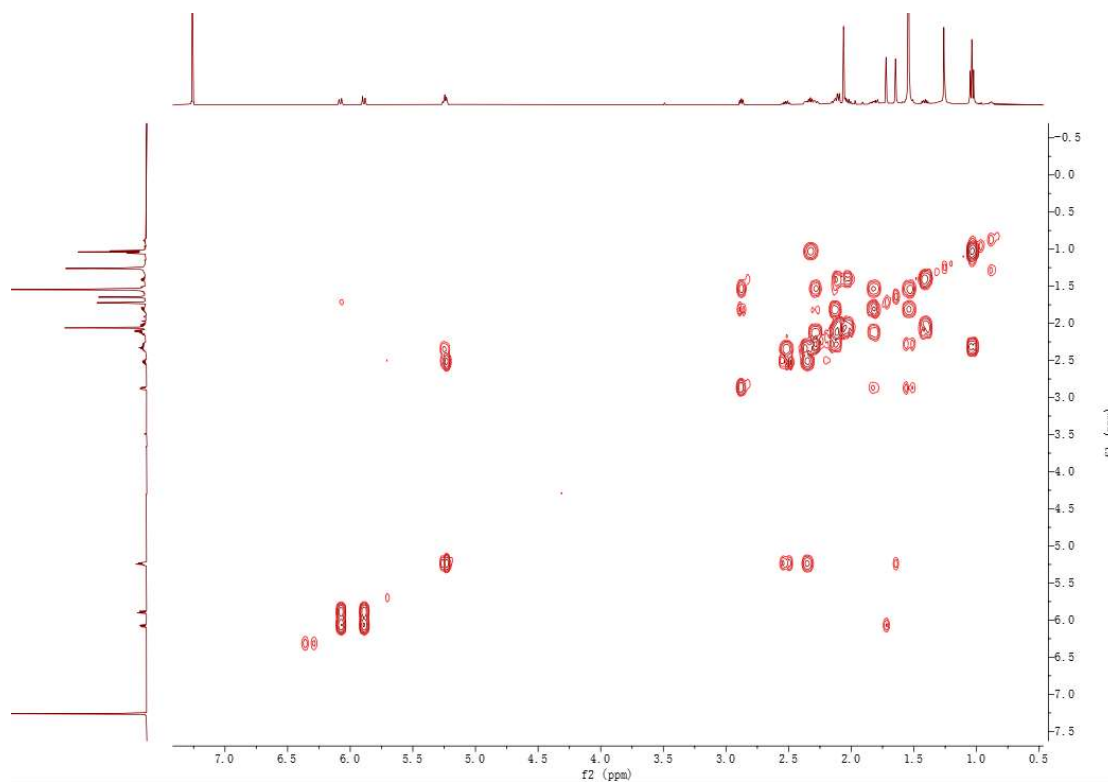

**Figure S5.5.**  $^1\text{H}$ - $^1\text{H}$  COSY spectrum (600 MHz) of compound **5** in  $\text{CDCl}_3$ .

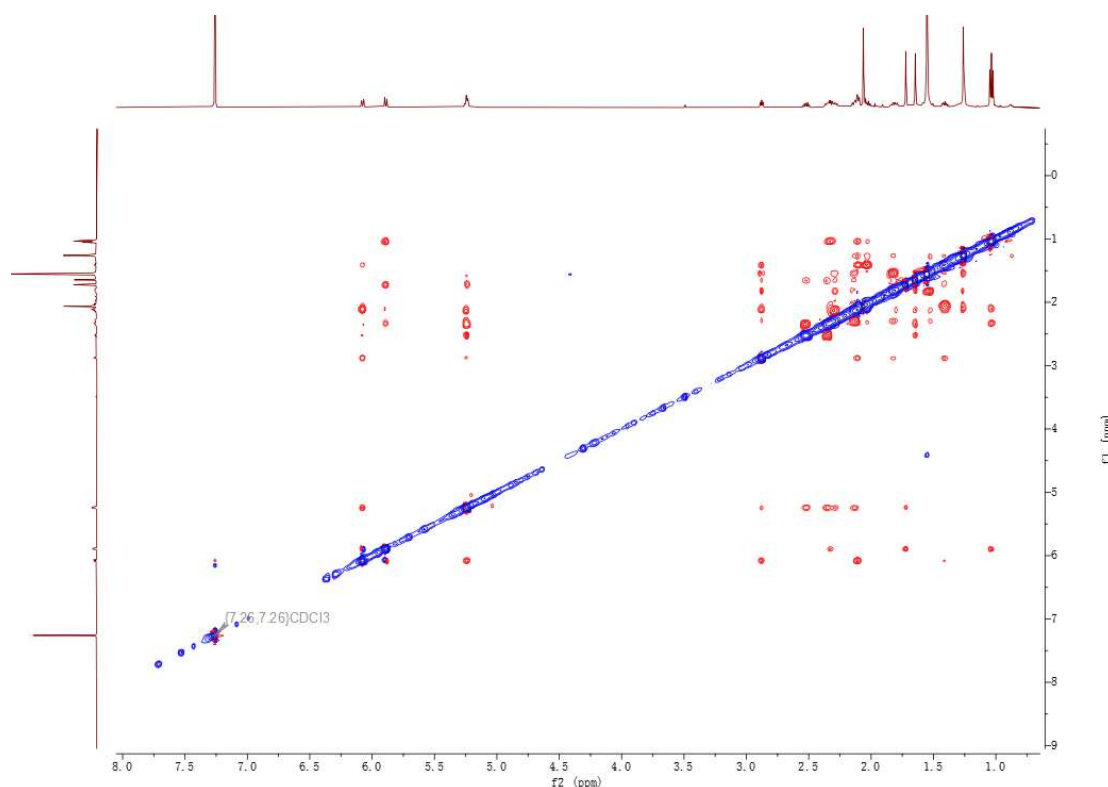

**Figure S5.6.** NOESY spectrum (600 MHz) of compound **5** in  $\text{CDCl}_3$ .

|                        |                                        |                               |                             |
|------------------------|----------------------------------------|-------------------------------|-----------------------------|
| <b>Data Filename</b>   | ESI202203894.d                         | <b>Sample Name</b>            | A8-Y2C13-3A                 |
| <b>Sample ID</b>       |                                        | <b>Position</b>               | P1-A5                       |
| <b>Instrument Name</b> | Agilent G6520 Q-TOF                    | <b>Acq Method</b>             | 20160322_MS_ESIH_POS_1min.m |
| <b>Acquired Time</b>   | 10/17/2022 13:22:49                    | <b>IRM Calibration Status</b> | Success                     |
| <b>DA Method</b>       | small molecular data analysis method.m | <b>Comment</b>                | ESIH by fangsu              |

#### User Spectra

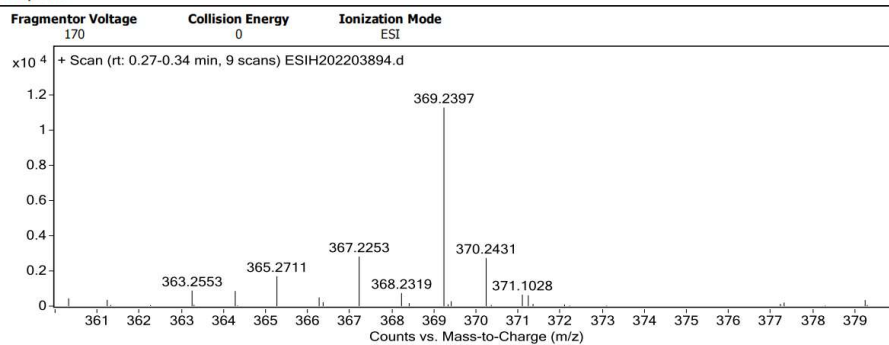

#### Formula Calculator Results

| m/z      | Calc m/z | Diff (mDa) | Diff (ppm) | Ion Formula   | Ion     |
|----------|----------|------------|------------|---------------|---------|
| 369.2397 | 369.24   | 0.36       | 0.98       | C22 H34 Na O3 | (M+Na)+ |

**Figure S5.7.** HR-ESIMS spectrum of compound **5**.

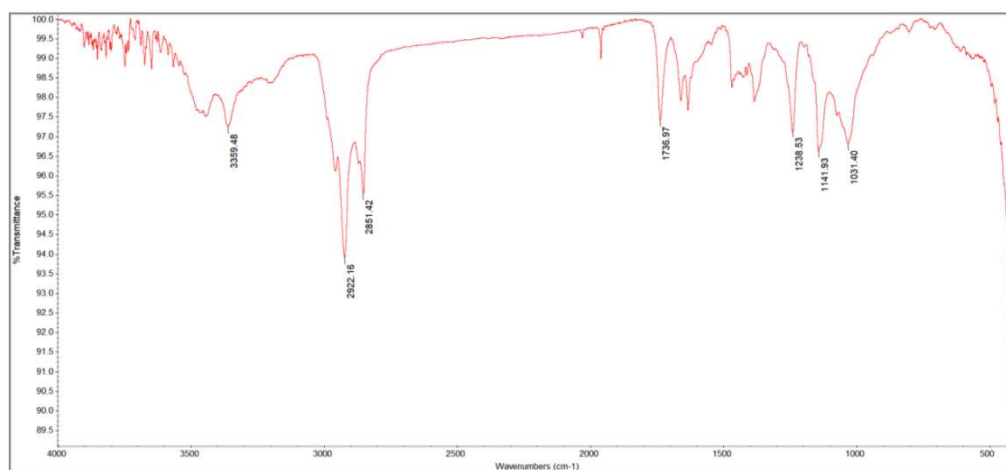

**Figure S5.8.** IR spectrum of compound **5**.

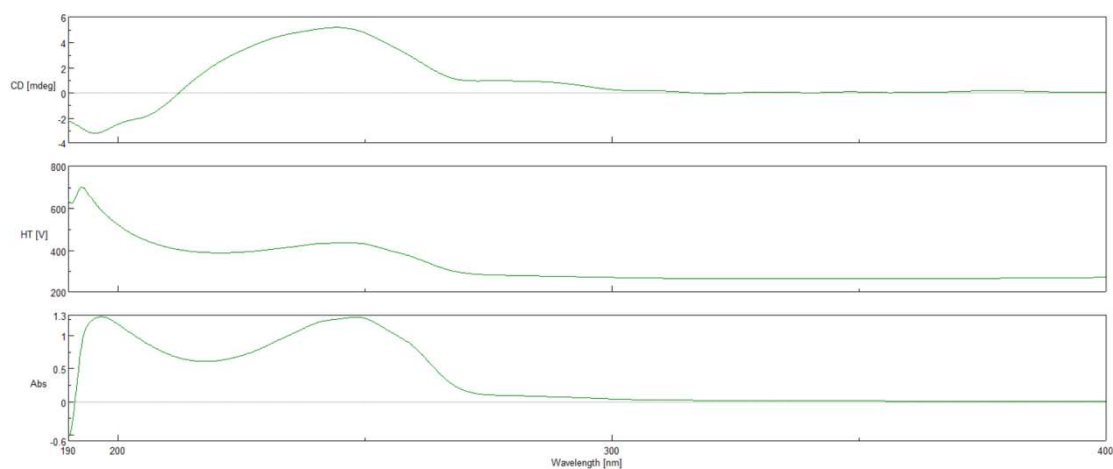

**Figure S5.9.** CD and UV spectrum of compound **5**.

## 7. Spectra of compound 9

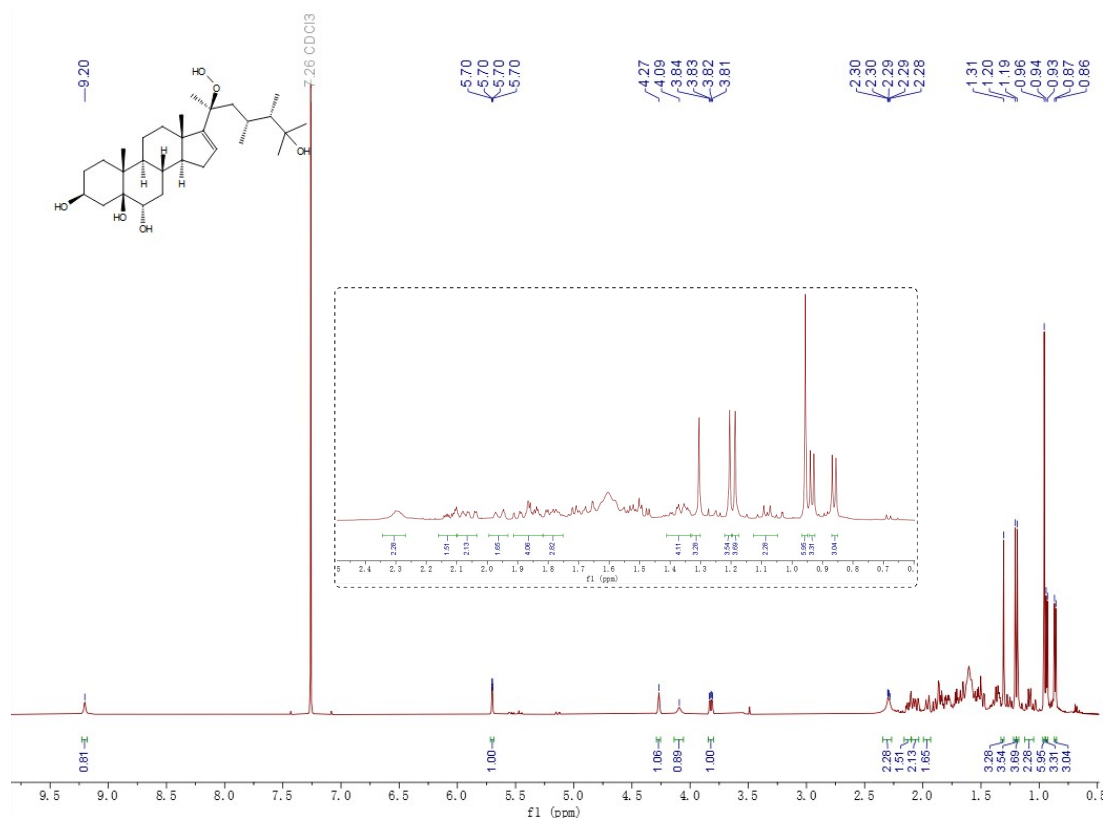

Figure S6.1. <sup>1</sup>H NMR spectrum (600 MHz) of compound 9 in CDCl<sub>3</sub>.

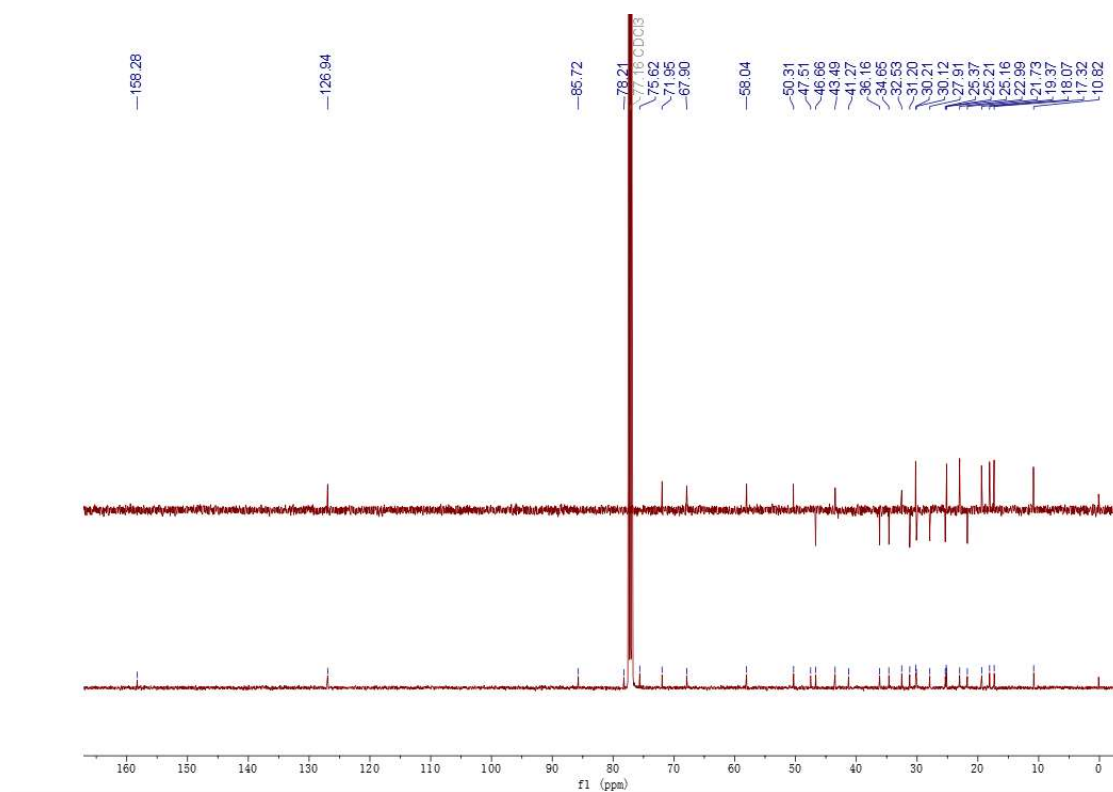

Figure S6.2. <sup>13</sup>C NMR spectrum (150 MHz) of compound 9 in CDCl<sub>3</sub>.

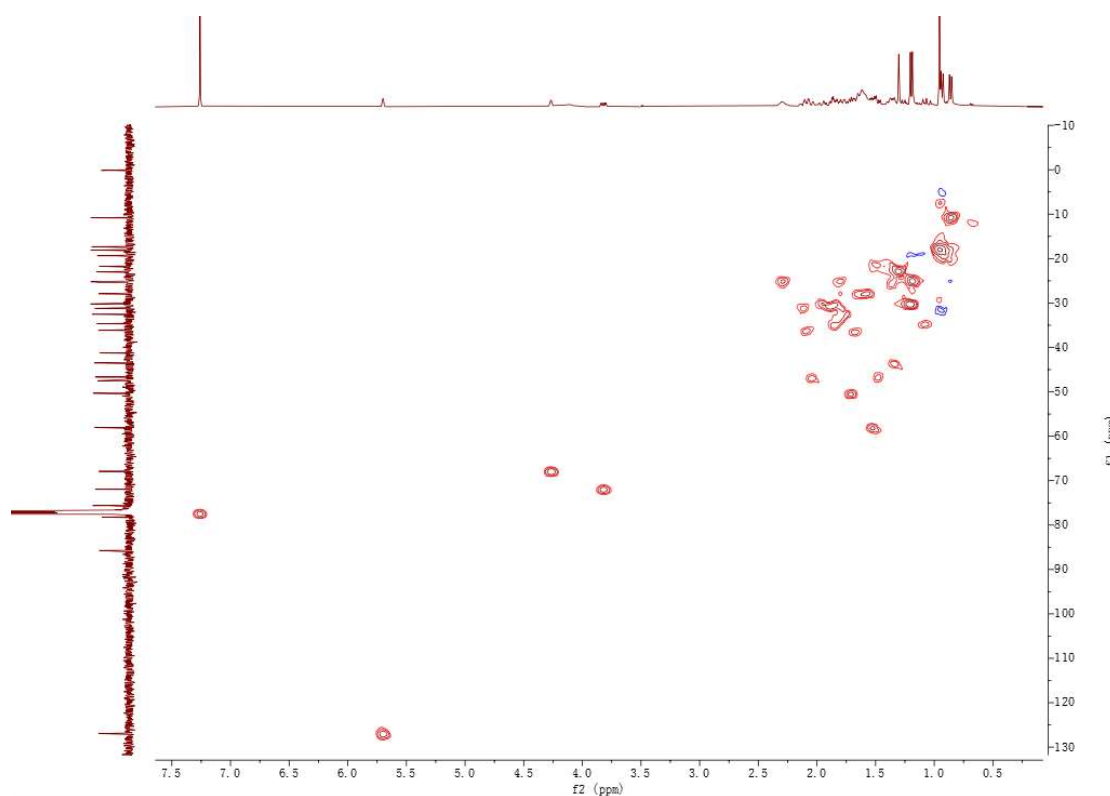

**Figure S6.3.** HSQC spectrum (600 MHz) of compound **9** in  $\text{CDCl}_3$ .

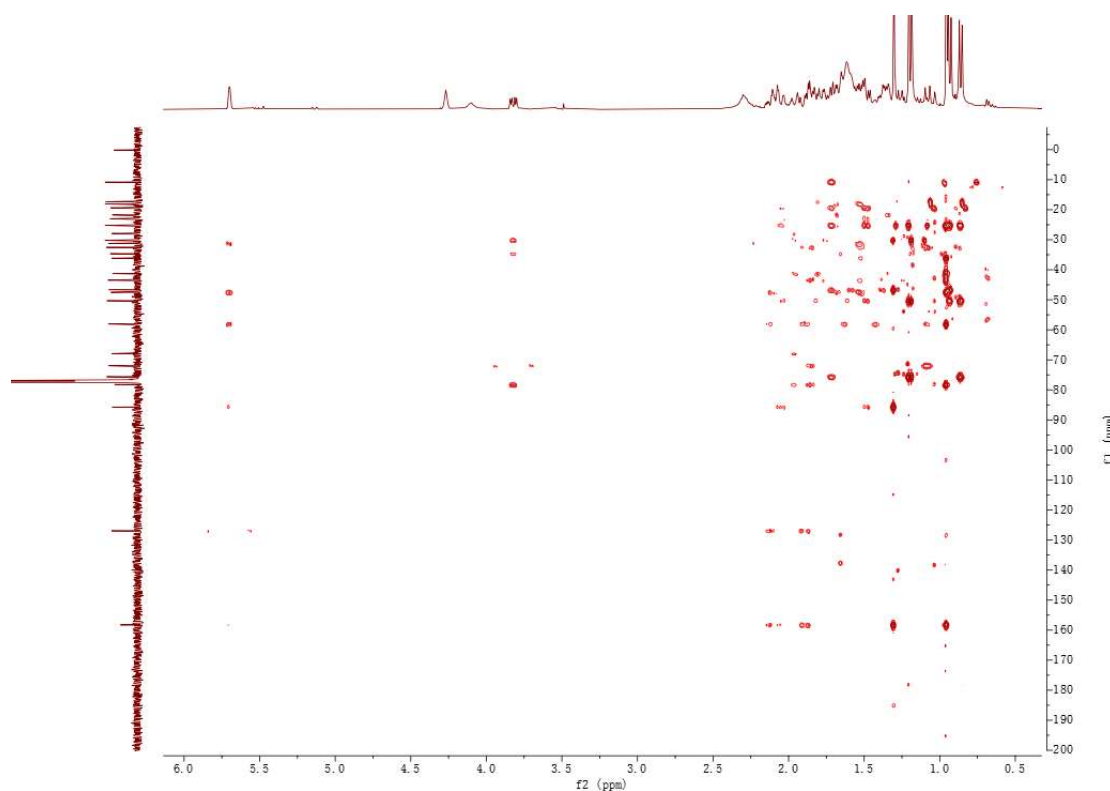

**Figure S6.4.** HMBC spectrum (600 MHz) of compound **9** in  $\text{CDCl}_3$ .

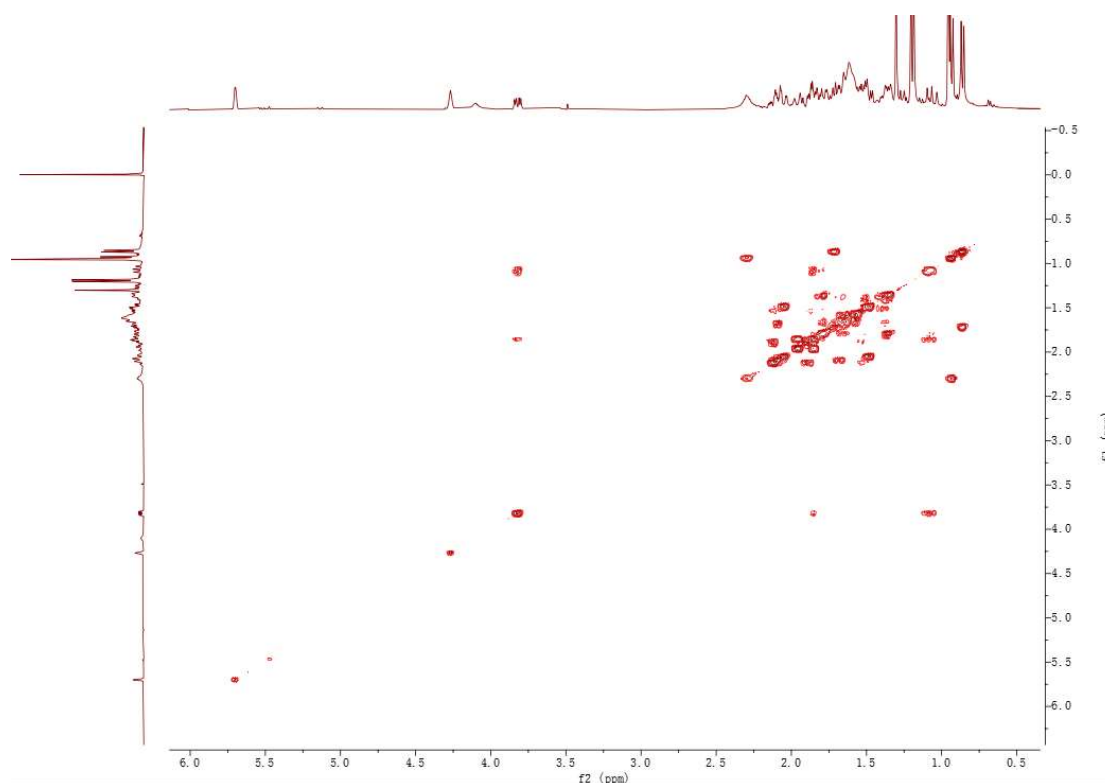

**Figure S6.5.**  $^1\text{H}$ - $^1\text{H}$  COSY spectrum (600 MHz) of compound **9** in  $\text{CDCl}_3$ .

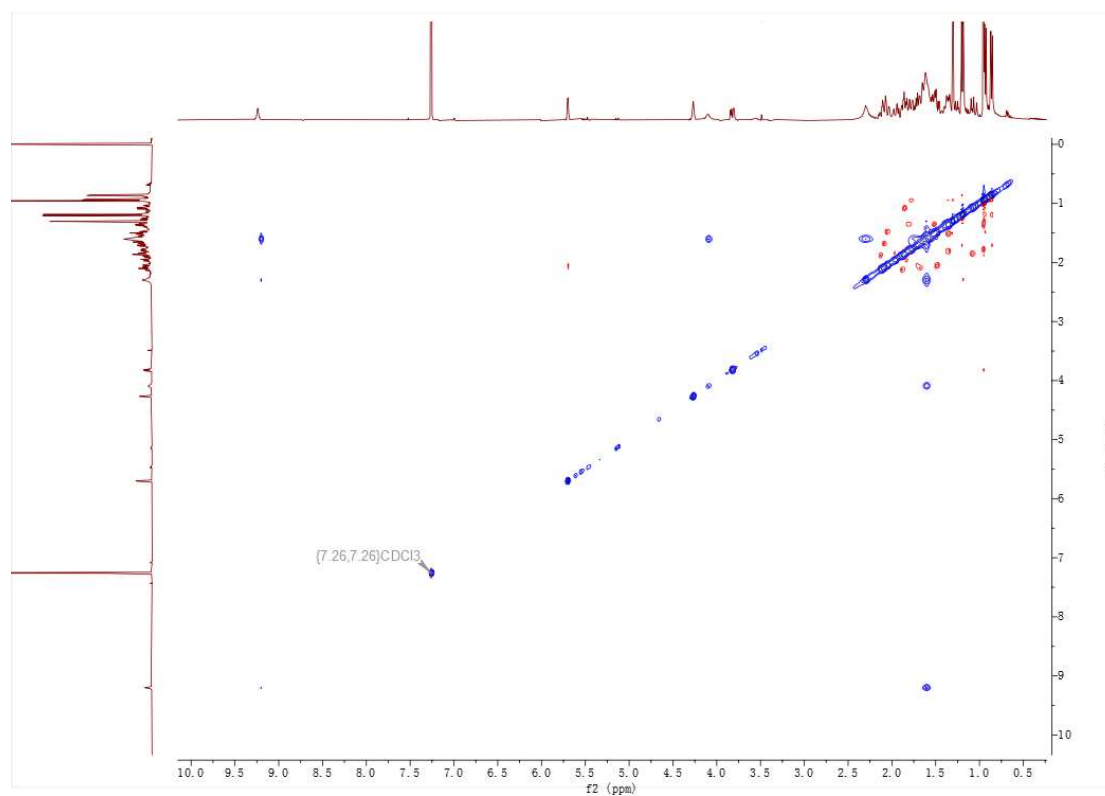

**Figure S6.6.** NOESY spectrum (600 MHz) of compound **9** in  $\text{CDCl}_3$ .

|                        |                                        |                               |                             |
|------------------------|----------------------------------------|-------------------------------|-----------------------------|
| <b>Data Filename</b>   | ESI202205273.d                         | <b>Sample Name</b>            | A8-Y9BEC                    |
| <b>Sample ID</b>       |                                        | <b>Position</b>               | P1-A3                       |
| <b>Instrument Name</b> | Agilent G6520 Q-TOF                    | <b>Acq Method</b>             | 20160322_MS_ESIH_POS_1min.m |
| <b>Acquired Time</b>   | 12/6/2022 14:22:34                     | <b>IRM Calibration Status</b> | Success                     |
| <b>DA Method</b>       | small molecular data analysis method.m | <b>Comment</b>                | ESI2 by fangsu              |

#### User Spectra

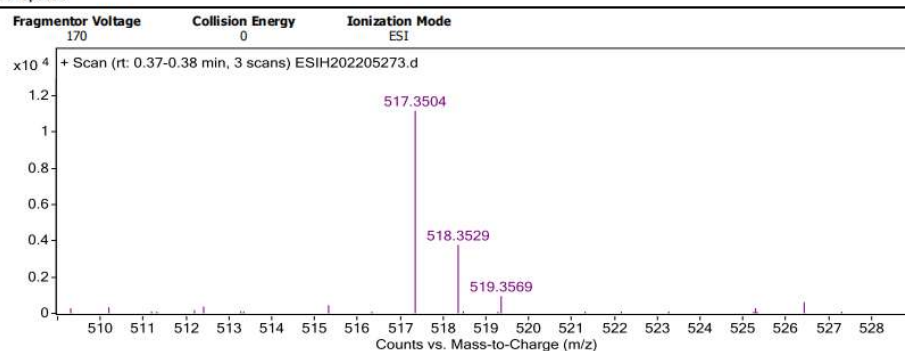

#### Formula Calculator Results

| m/z      | Calc m/z | Diff (mDa) | Diff (ppm) | Ion Formula                                      | Ion     |
|----------|----------|------------|------------|--------------------------------------------------|---------|
| 517.3504 | 517.35   | -0.41      | -0.79      | C <sub>29</sub> H <sub>50</sub> NaO <sub>6</sub> | (M+Na)+ |

**Figure S6.7.** HR-ESIMS spectrum of compound **9**.

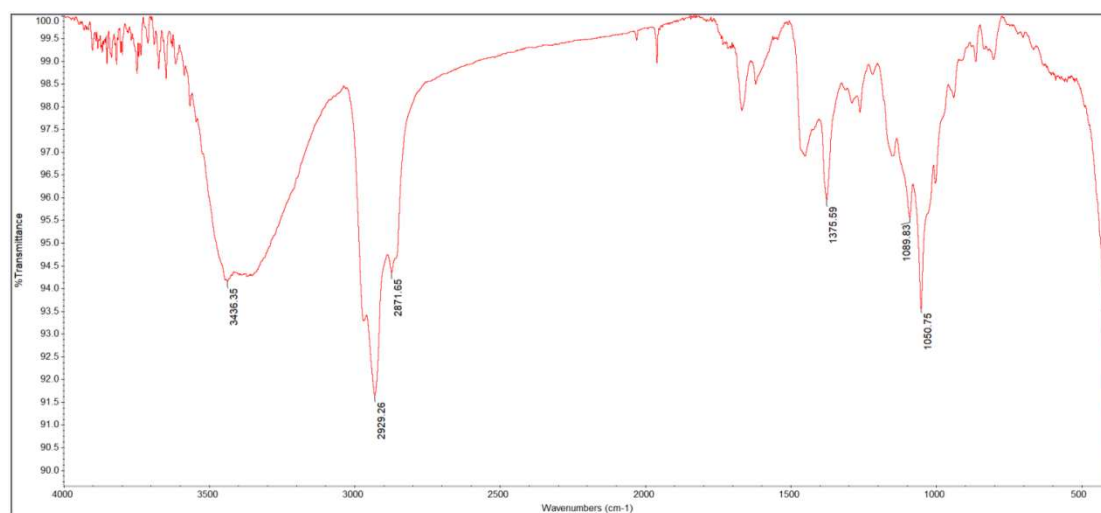

**Figure S6.8.** IR spectrum of compound **9**.

## 8. Spectra of compound 10

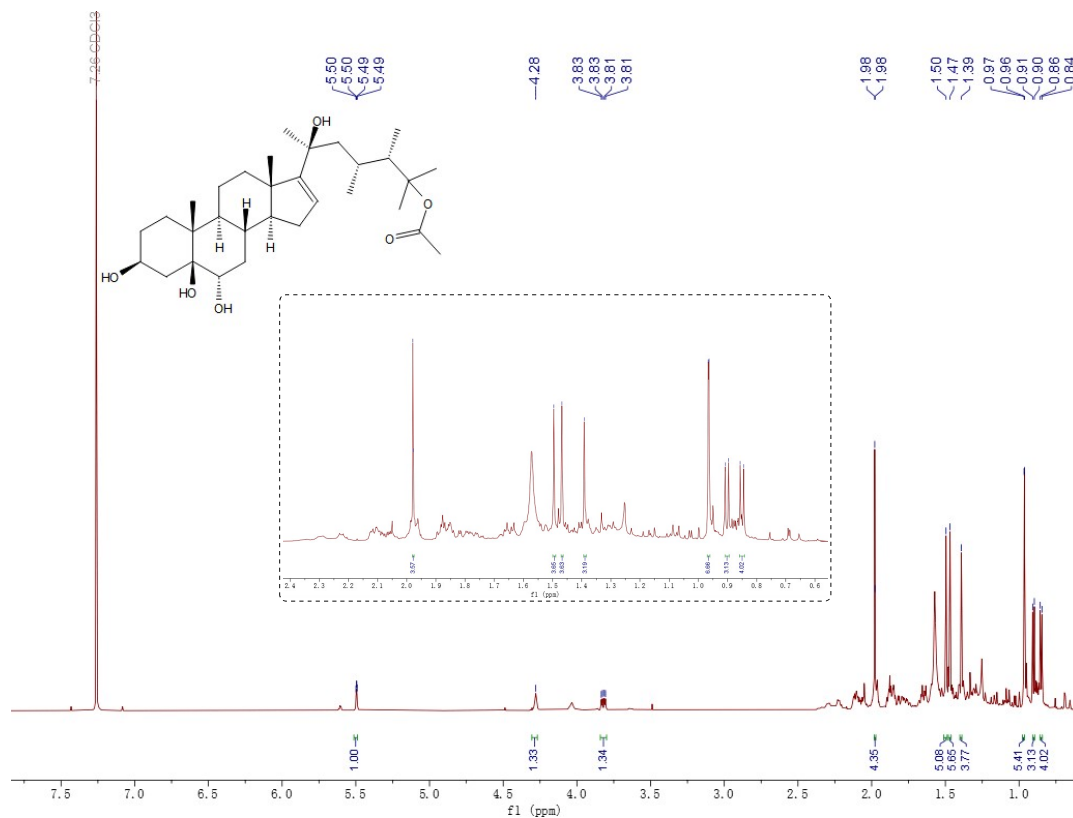

Figure S7.1.  $^1\text{H}$  NMR spectrum (600 MHz) of compound 10 in  $\text{CDCl}_3$ .

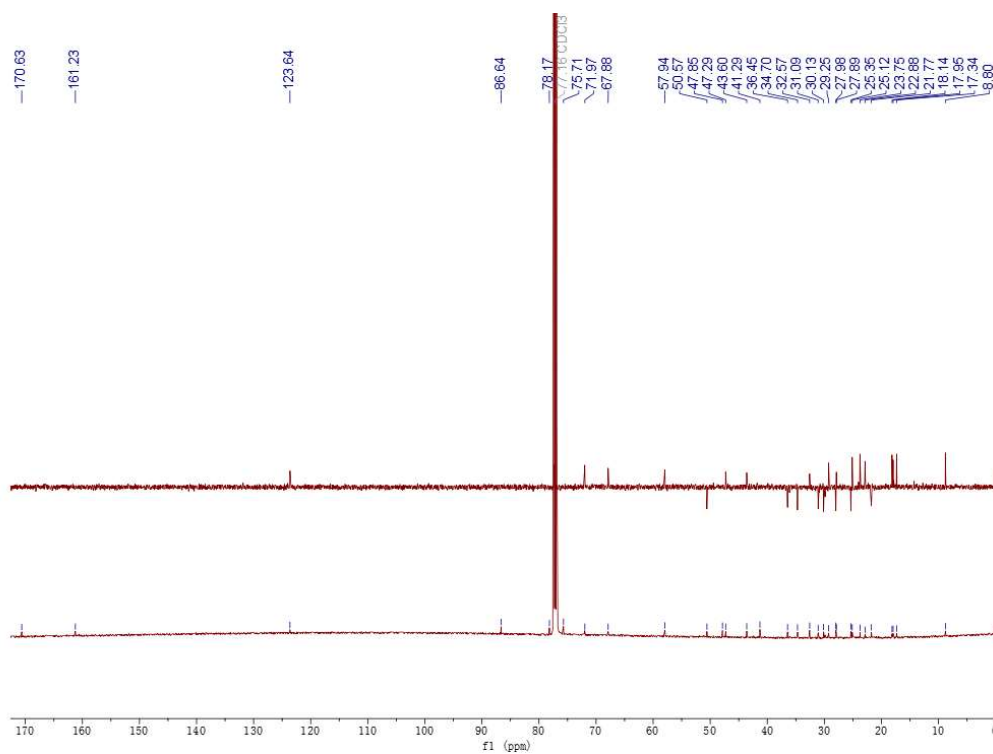

Figure S7.2.  $^{13}\text{C}$  NMR spectrum (150 MHz) of compound 10 in  $\text{CDCl}_3$ .

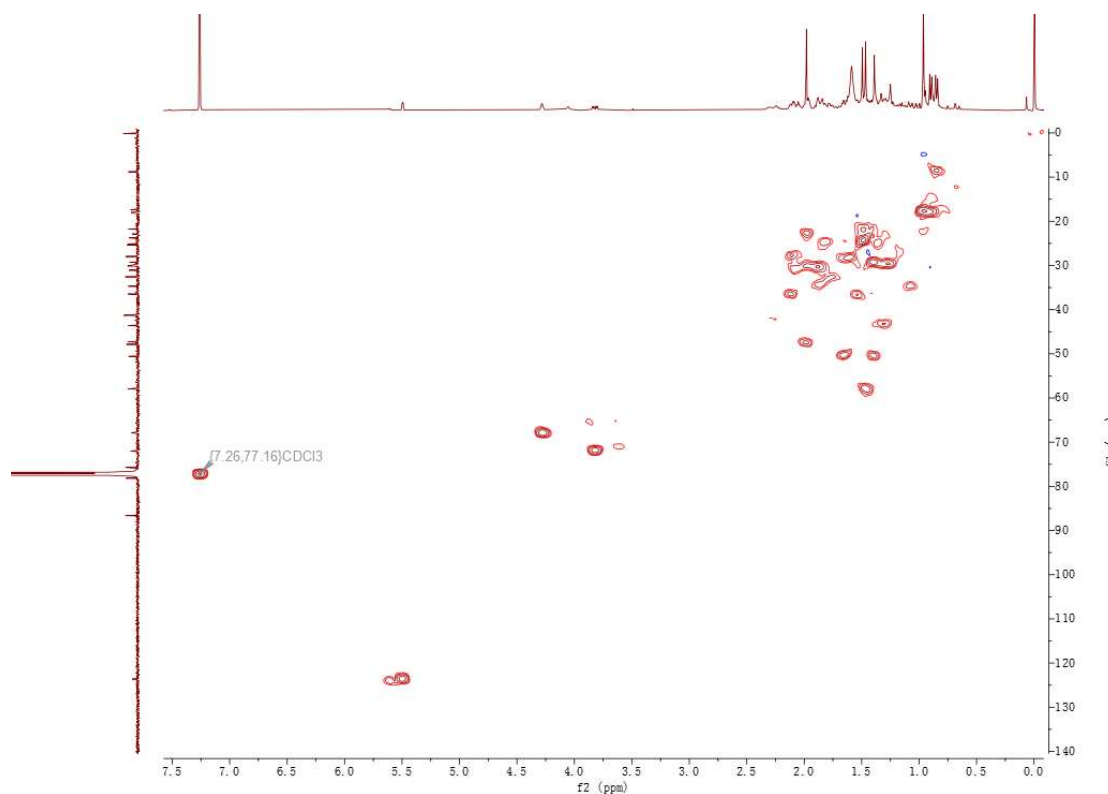

**Figure S7.3.** HSQC spectrum (600 MHz) of compound **10** in  $\text{CDCl}_3$ .

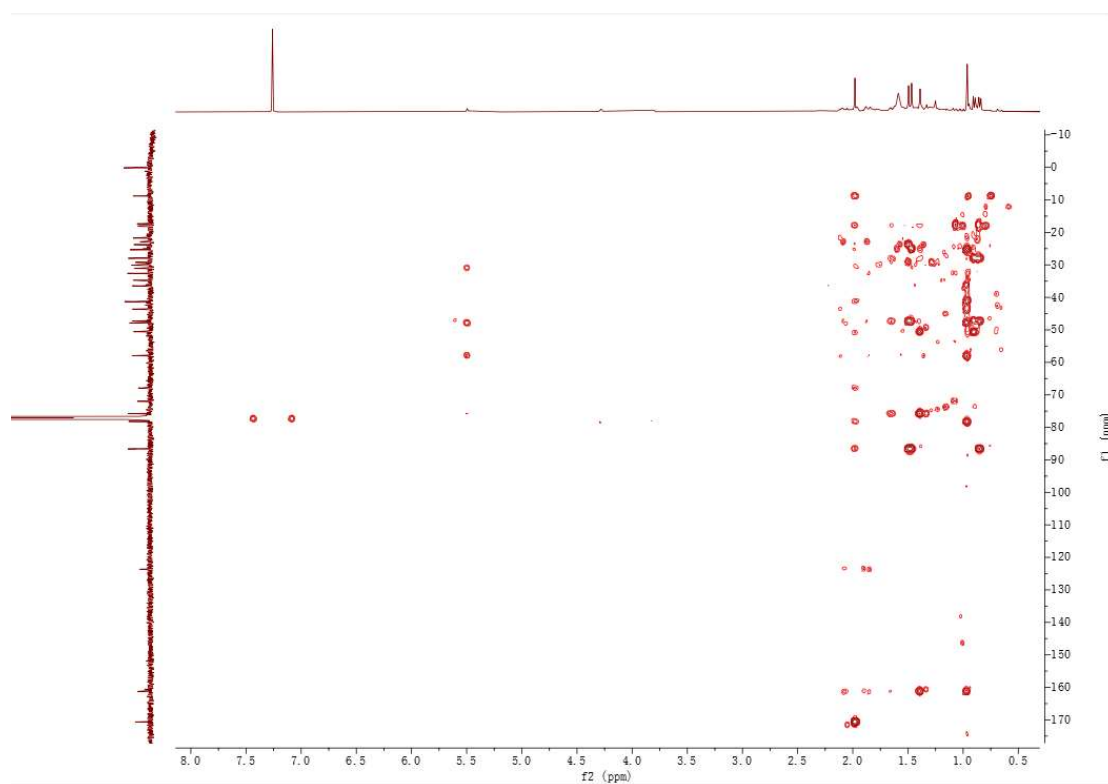

**Figure S7.4.** HMBC spectrum (600 MHz) of compound **10** in  $\text{CDCl}_3$ .



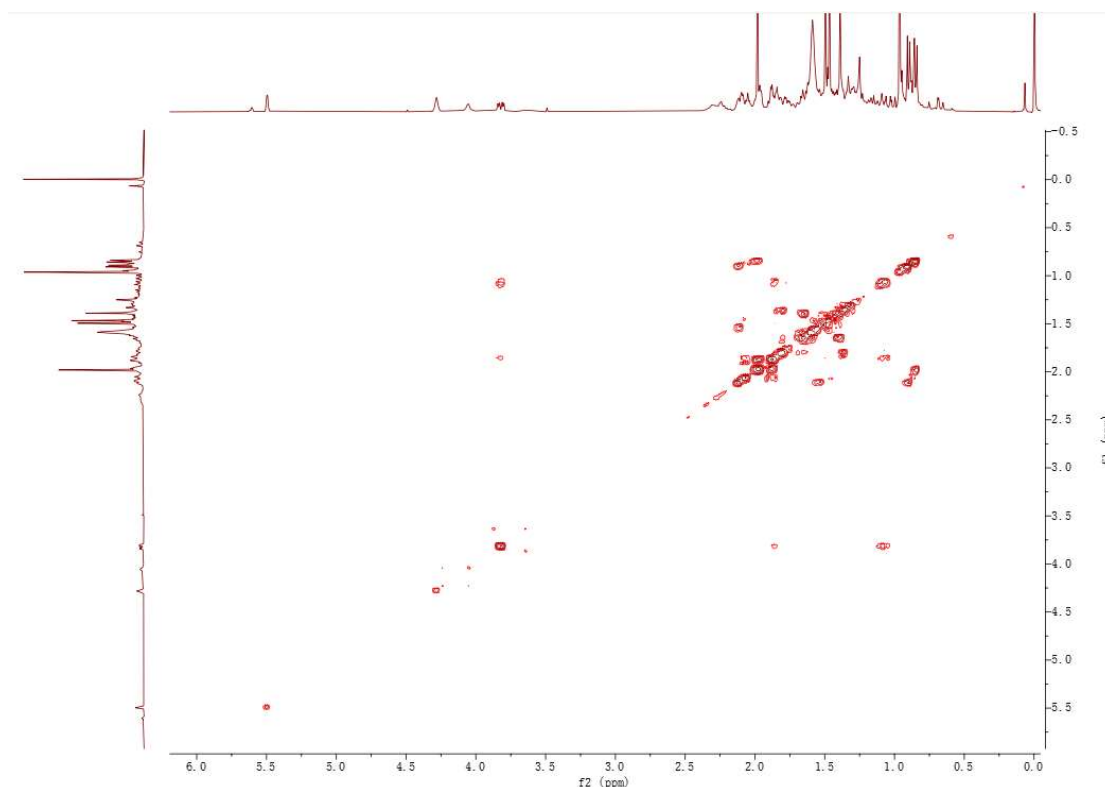

**Figure S7.5.**  $^1\text{H}$ - $^1\text{H}$  COSY spectrum (600 MHz) of compound **10** in  $\text{CDCl}_3$ .

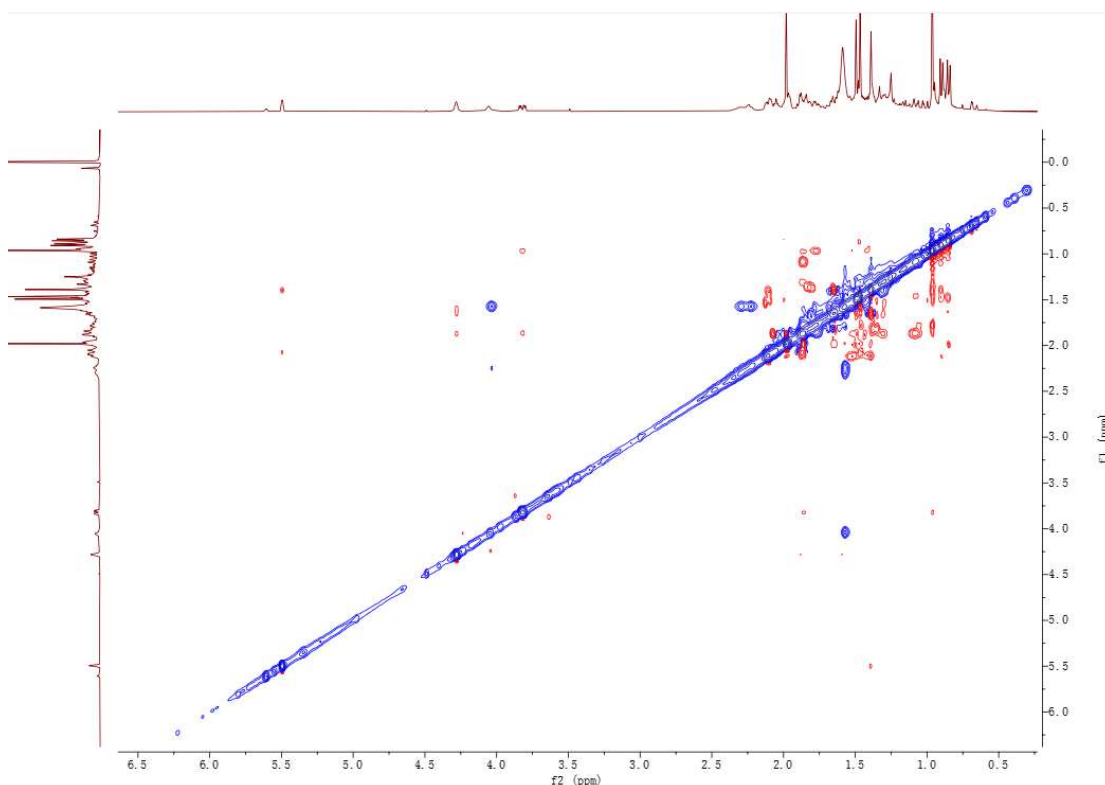

**Figure S7.6.** NOESY spectrum (600 MHz) of compound **10** in  $\text{CDCl}_3$ .

|                        |                                        |                               |                             |
|------------------------|----------------------------------------|-------------------------------|-----------------------------|
| <b>Data Filename</b>   | ESI202205569.d                         | <b>Sample Name</b>            | A8-Y9ADFGC                  |
| <b>Sample ID</b>       |                                        | <b>Position</b>               | P1-A4                       |
| <b>Instrument Name</b> | Agilent G6520 Q-TOF                    | <b>Acq Method</b>             | 20160322_MS_ESIH_POS_1min.m |
| <b>Acquired Time</b>   | 12/15/2022 10:27:19                    | <b>IRM Calibration Status</b> | Success                     |
| <b>DA Method</b>       | small molecular data analysis method.m | <b>Comment</b>                | ESIH by fangsu              |

User Spectra

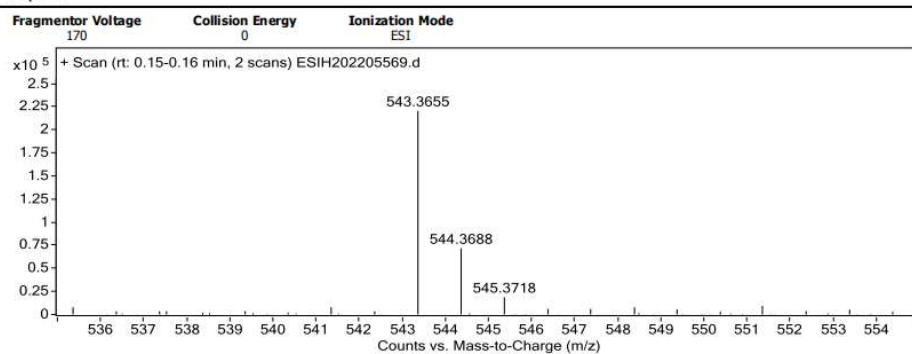

Formula Calculator Results

| m/z      | Calc m/z | Diff (mDa) | Diff (ppm) | Ion Formula   | Ion     |
|----------|----------|------------|------------|---------------|---------|
| 543.3655 | 543.3656 | 0.08       | 0.14       | C31 H52 Na O6 | (M+Na)+ |

**Figure S7.7.** HR-ESIMS spectrum of compound **10**.

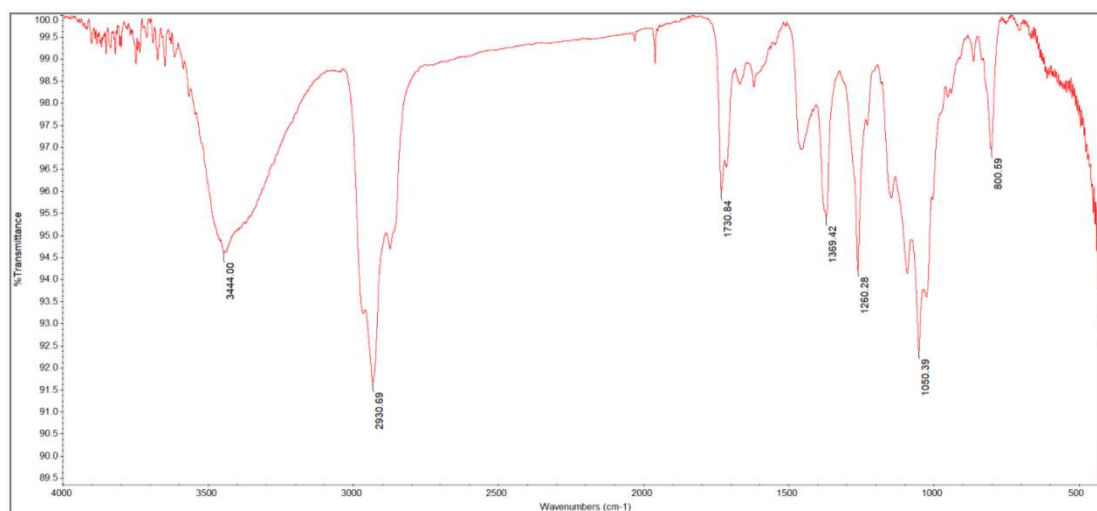

**Figure S7.8.** IR spectrum of compound **10**.

## 9. Spectra of compound 11

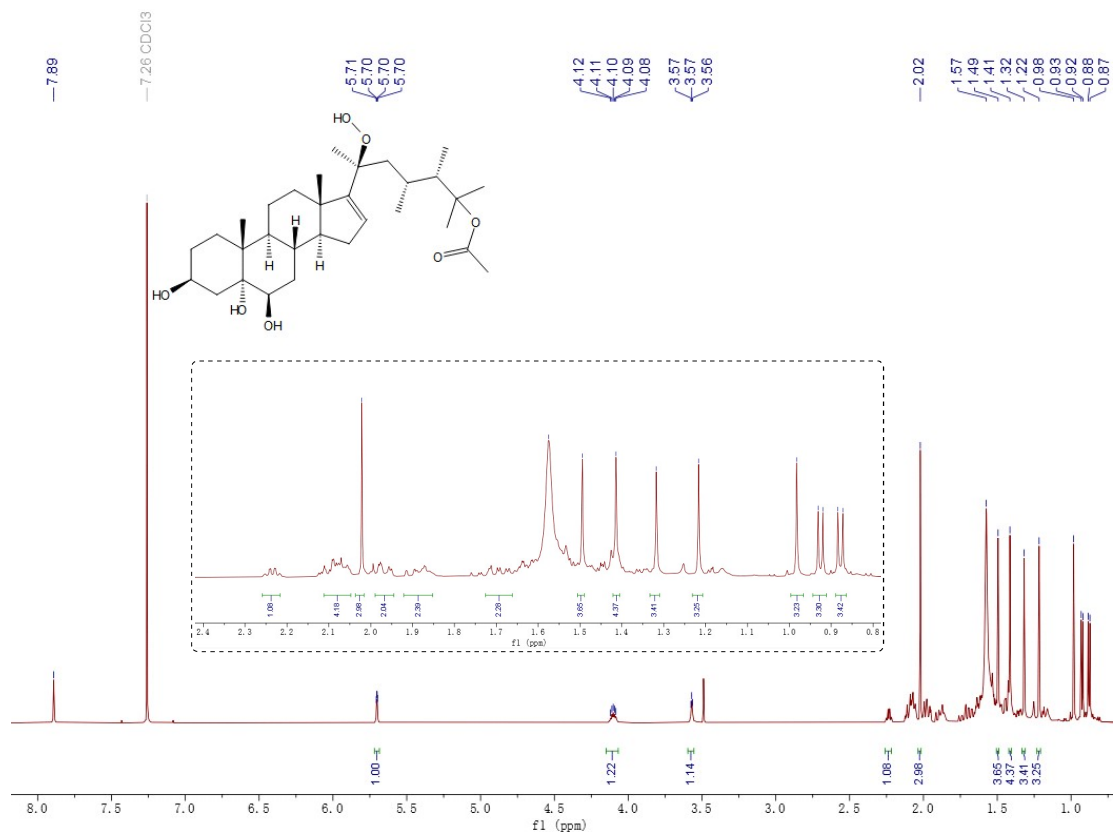

Figure S8.1. <sup>1</sup>H NMR spectrum (600 MHz) of compound 11 in CDCl<sub>3</sub>.

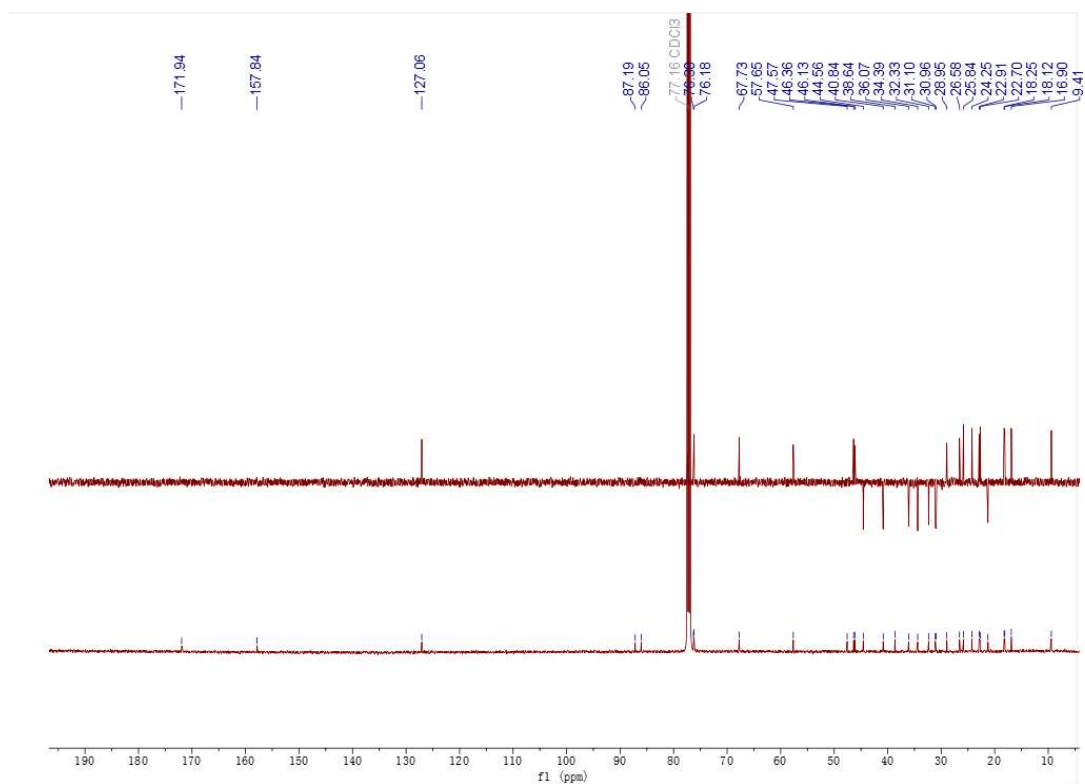

Figure S8.2. <sup>13</sup>C NMR spectrum (150 MHz) of compound 11 in CDCl<sub>3</sub>.

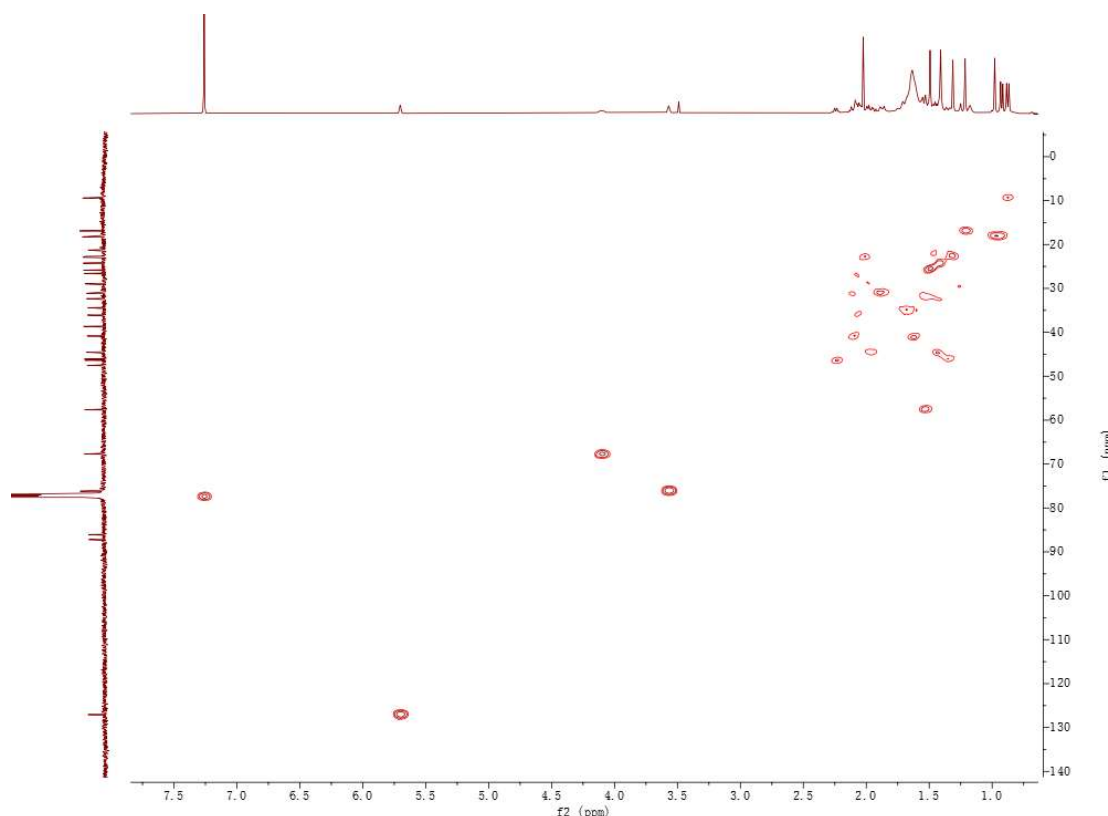

**Figure S8.3.** HSQC spectrum (600 MHz) of compound **11** in  $\text{CDCl}_3$ .

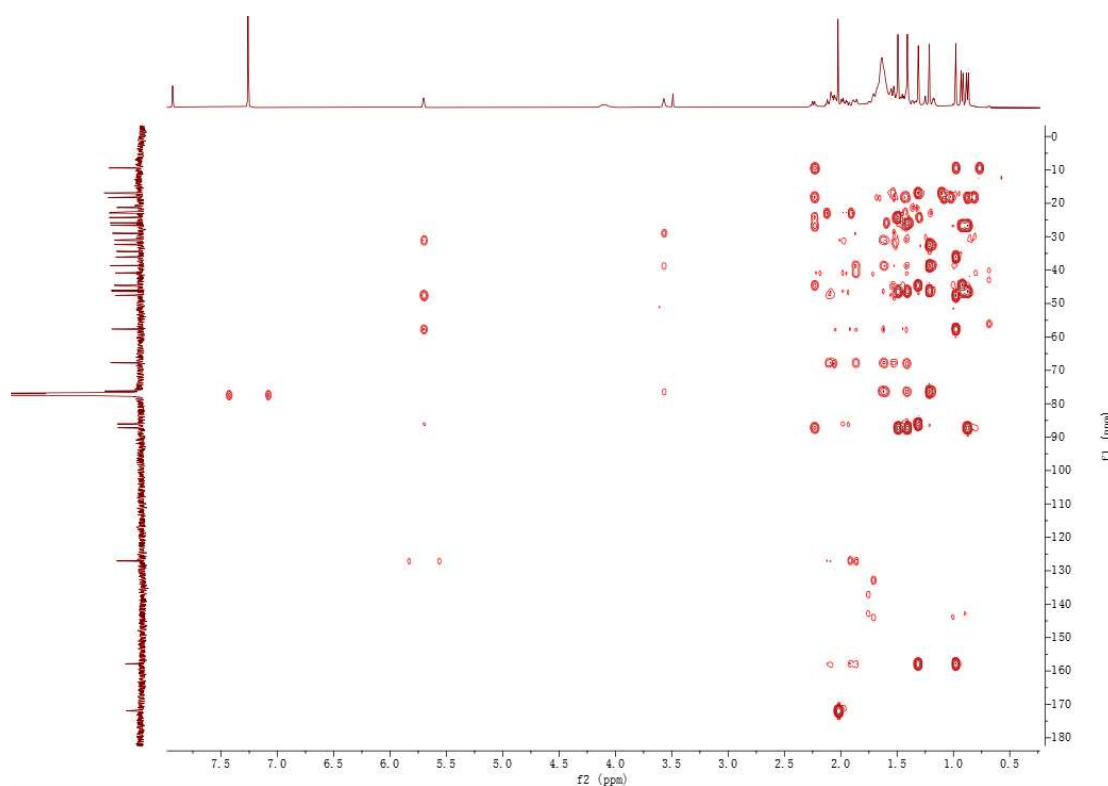

**Figure S8.4.** HMBC spectrum (600 MHz) of compound **11** in  $\text{CDCl}_3$ .

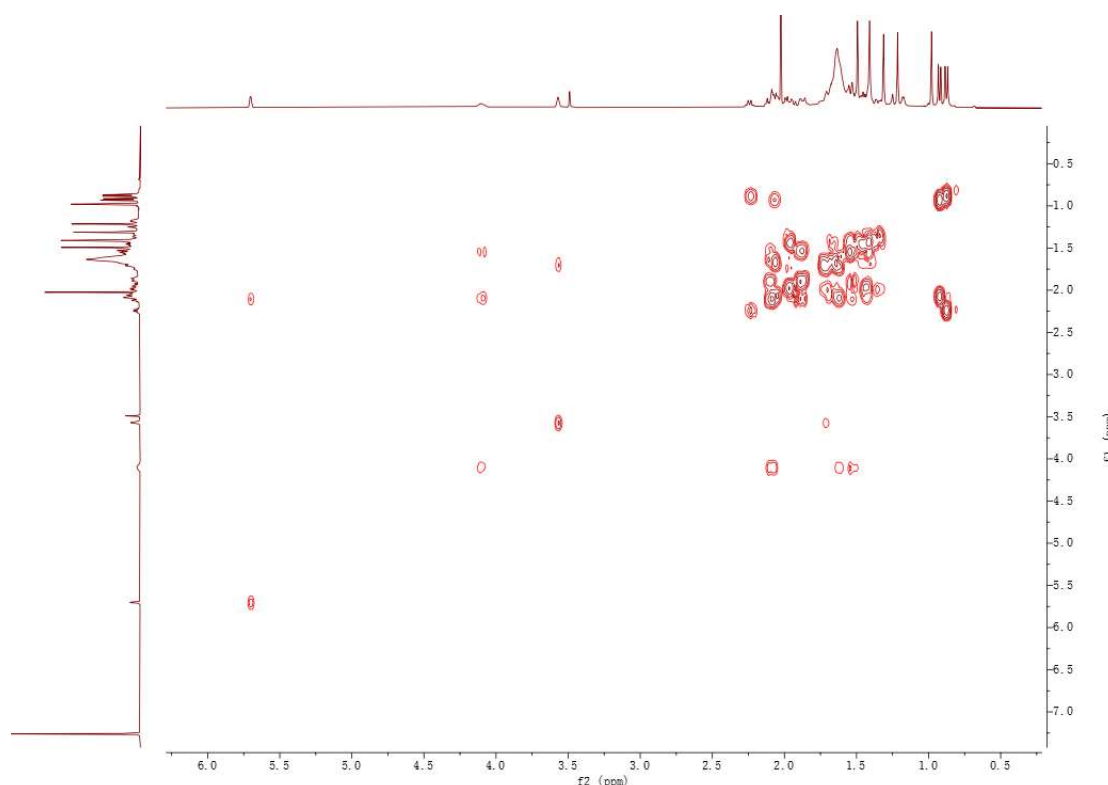

**Figure S8.5.**  $^1\text{H}$ - $^1\text{H}$  COSY spectrum (600 MHz) of compound **11** in  $\text{CDCl}_3$ .

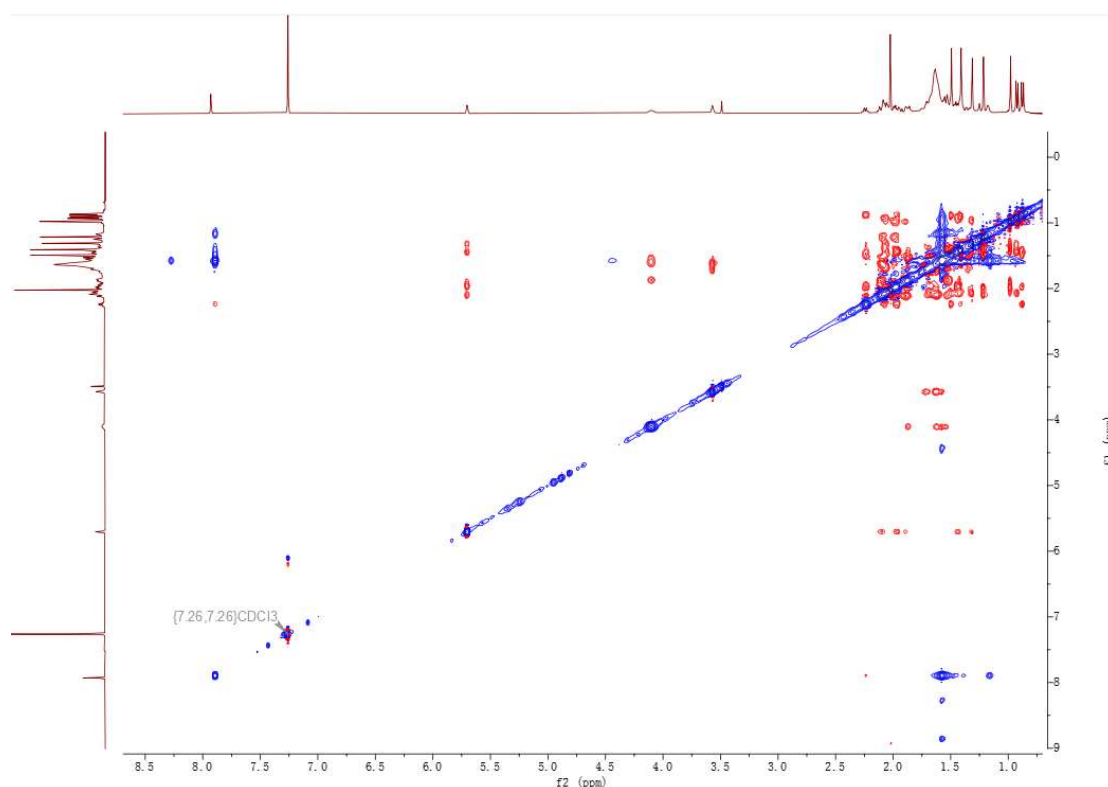

**Figure S8.6.** NOESY spectrum (600 MHz) of compound **11** in  $\text{CDCl}_3$ .

|                        |                                        |                               |                             |
|------------------------|----------------------------------------|-------------------------------|-----------------------------|
| <b>Data Filename</b>   | ESI202205699.d                         | <b>Sample Name</b>            | A8-A8-Y9ADFE                |
| <b>Sample ID</b>       |                                        | <b>Position</b>               | P1-D9                       |
| <b>Instrument Name</b> | Agilent G6520 Q-TOF                    | <b>Acq Method</b>             | 20160322_MS_ESIH_POS_1min.m |
| <b>Acquired Time</b>   | 12/16/2022 12:37:30                    | <b>IRM Calibration Status</b> | Success                     |
| <b>DA Method</b>       | small molecular data analysis method.m | <b>Comment</b>                | ESIH by fangsu              |

#### User Spectra

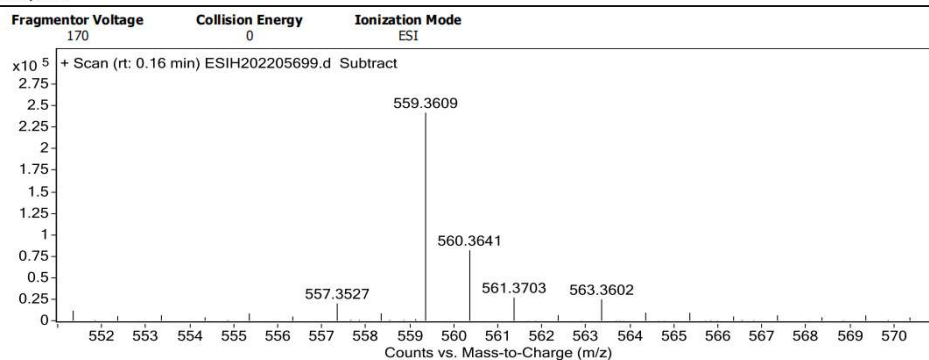

#### Formula Calculator Results

| m/z      | Calc m/z | Diff (mDa) | Diff (ppm) | Ion Formula   | Ion     |
|----------|----------|------------|------------|---------------|---------|
| 559.3609 | 559.3605 | -0.35      | -0.62      | C31 H52 Na O7 | (M+Na)+ |

**Figure S8.7.** HR-ESIMS spectrum of compound **11**.

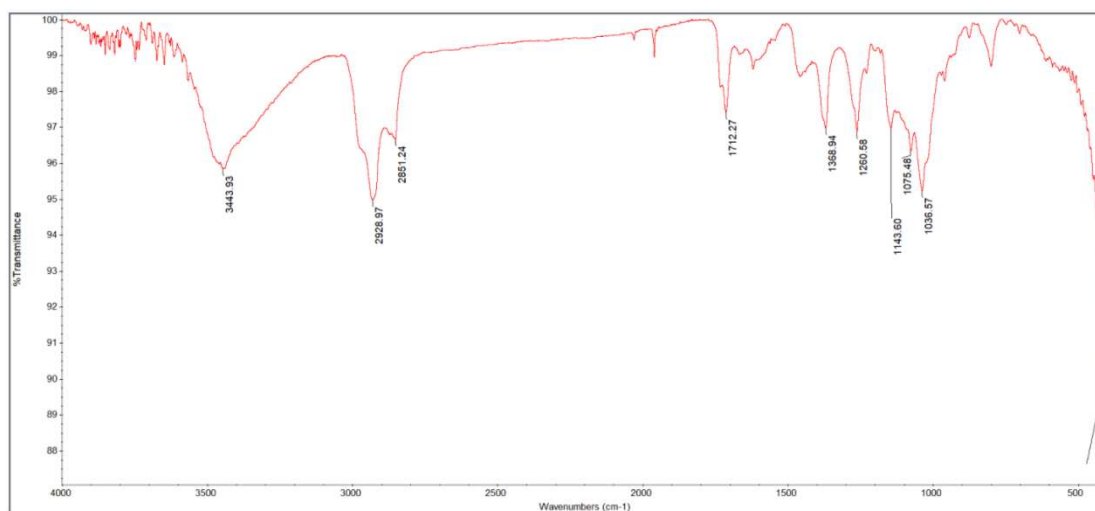

**Figure S8.8.** IR spectrum of compound **11**.

## 10. Spectra of compound 12

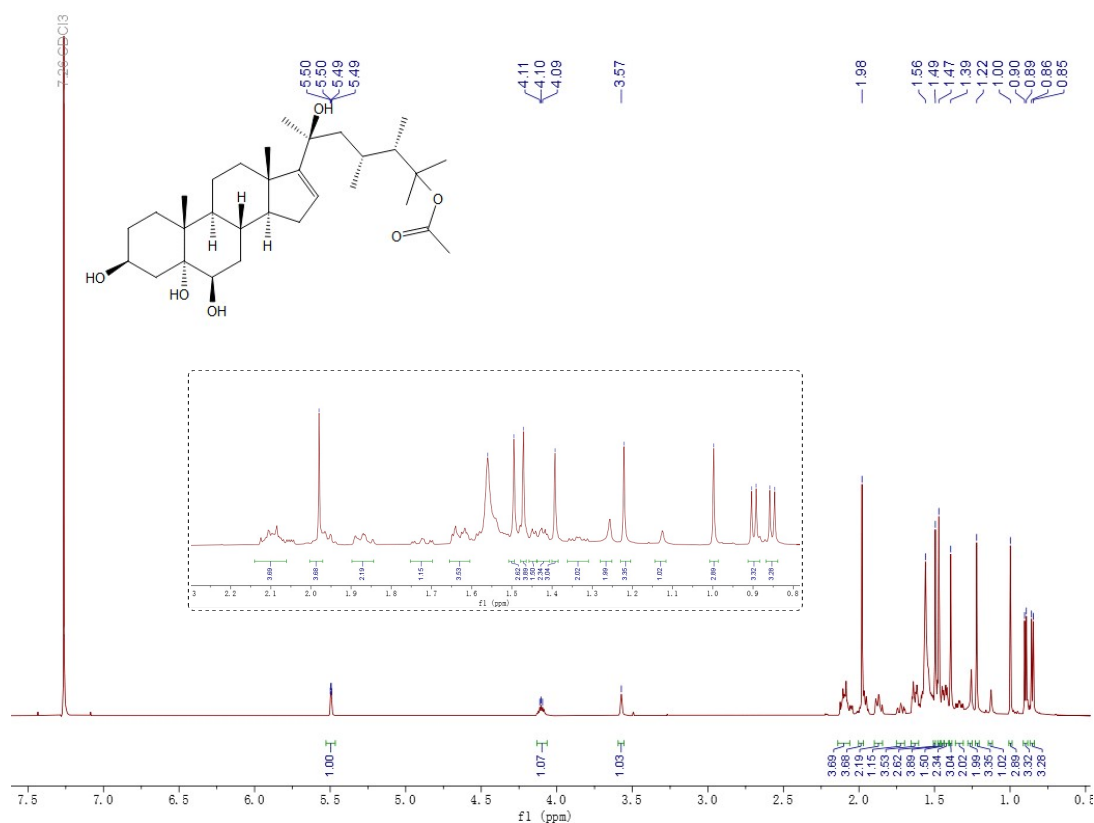

Figure S9.1.  $^1\text{H}$  NMR spectrum (600 MHz) of compound 12 in  $\text{CDCl}_3$ .

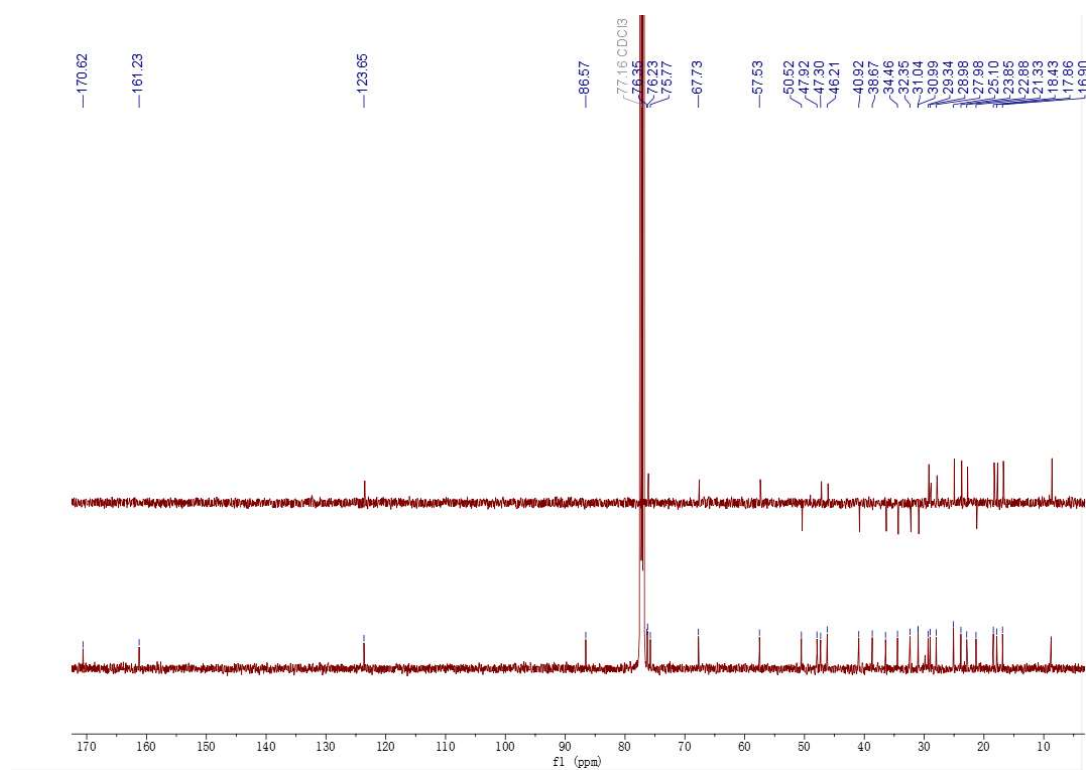

Figure S9.2.  $^{13}\text{C}$  NMR spectrum (150 MHz) of compound 12 in  $\text{CDCl}_3$ .

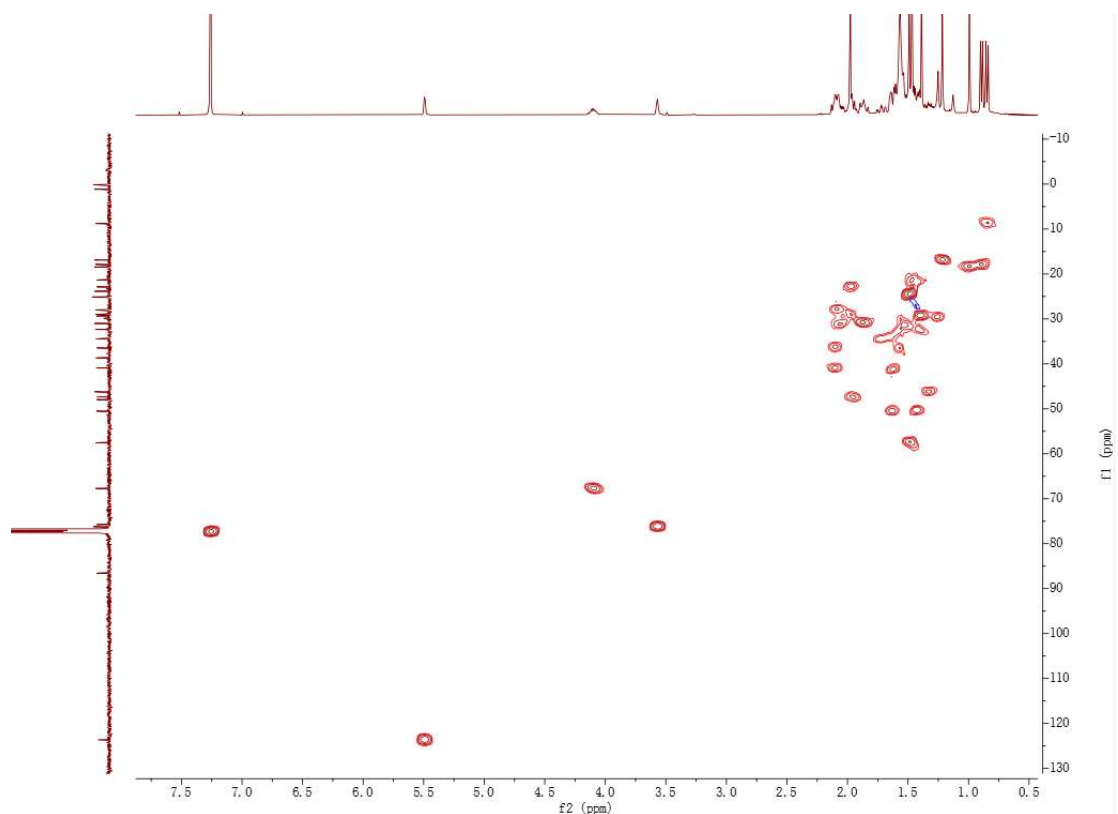

**Figure S9.3.** HSQC spectrum (600 MHz) of compound **12** in  $\text{CDCl}_3$ .

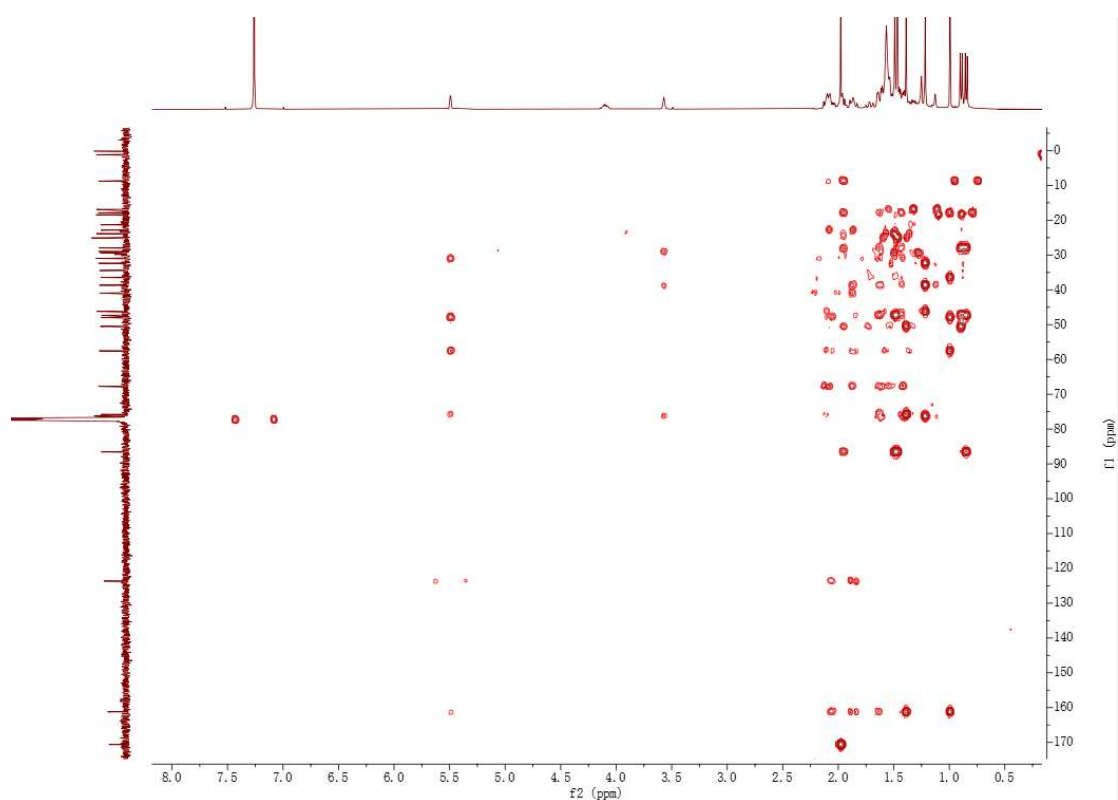

**Figure S9.4.** HMBC spectrum (600 MHz) of compound **12** in  $\text{CDCl}_3$ .



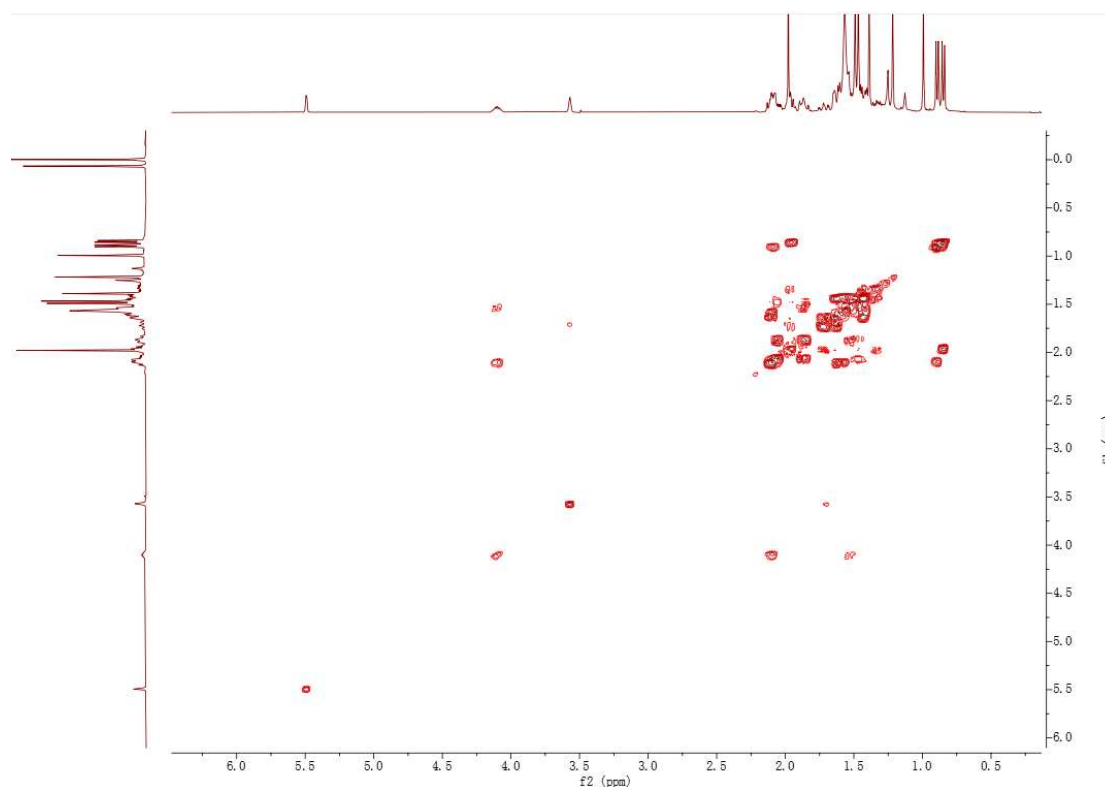

**Figure S9.5.**  $^1\text{H}$ - $^1\text{H}$  COSY spectrum (600 MHz) of compound **12** in  $\text{CDCl}_3$ .

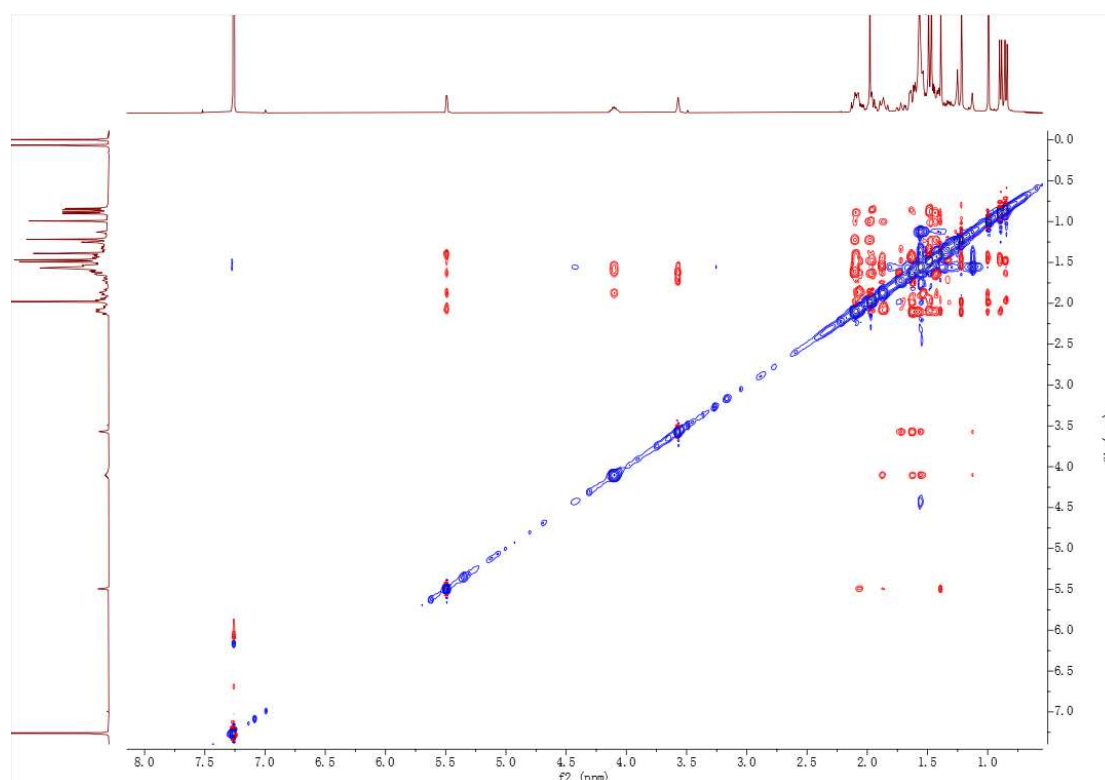

**Figure S9.6.** NOESY spectrum (600 MHz) of compound **12** in  $\text{CDCl}_3$ .

|                        |                                        |                               |                             |
|------------------------|----------------------------------------|-------------------------------|-----------------------------|
| <b>Data Filename</b>   | ESIH202205698.d                        | <b>Sample Name</b>            | A8-Y9AECA                   |
| <b>Sample ID</b>       |                                        | <b>Position</b>               | P1-D8                       |
| <b>Instrument Name</b> | Agilent G6520 Q-TOF                    | <b>Acq Method</b>             | 20160322_MS_ESIH_POS_1min.m |
| <b>Acquired Time</b>   | 12/16/2022 12:36:15                    | <b>IRM Calibration Status</b> | Success                     |
| <b>DA Method</b>       | small molecular data analysis method.m | <b>Comment</b>                | ESIH by fangsu              |

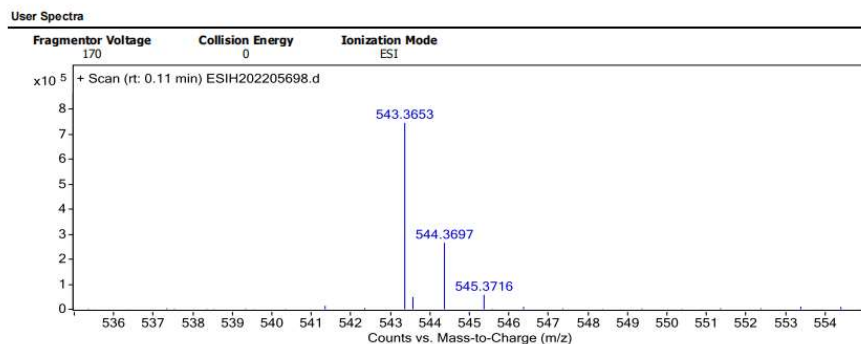

| Formula Calculator Results |          |            |            |               |         |
|----------------------------|----------|------------|------------|---------------|---------|
| m/z                        | Calc m/z | Diff (mDa) | Diff (ppm) | Ion Formula   | Ion     |
| 543.3653                   | 543.3656 | 0.26       | 0.48       | C31 H52 Na O6 | (M+Na)+ |

Figure S9.7. HR-ESIMS spectrum of compound 12.

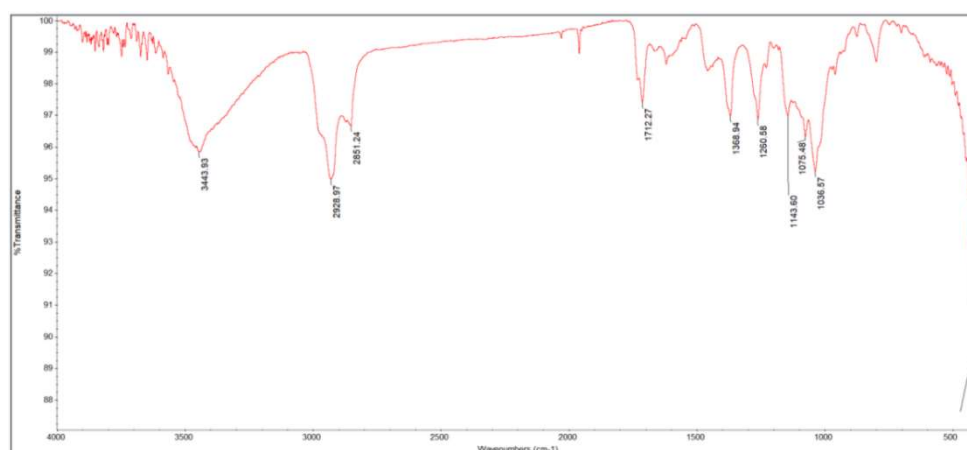

Figure S9.8. IR spectrum of compound 12.

## 11. Spectra of compound 15a

|                        |                                        |                               |                             |
|------------------------|----------------------------------------|-------------------------------|-----------------------------|
| <b>Data Filename</b>   | ESIH202300996.d                        | <b>Sample Name</b>            | A8-Y9BCCC                   |
| <b>Sample ID</b>       |                                        | <b>Position</b>               | P1-A2                       |
| <b>Instrument Name</b> | Agilent G6520 Q-TOF                    | <b>Acq Method</b>             | 20160322_MS_ESIH_POS_1min.m |
| <b>Acquired Time</b>   | 2/16/2023 15:05:15                     | <b>IRM Calibration Status</b> | Success                     |
| <b>DA Method</b>       | small molecular data analysis method.m | <b>Comment</b>                | ESIH by fangsu              |

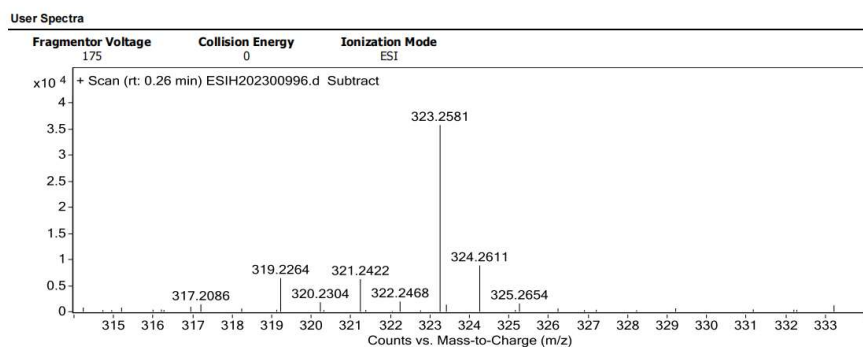

| Formula Calculator Results |          |            |            |             |        |
|----------------------------|----------|------------|------------|-------------|--------|
| m/z                        | Calc m/z | Diff (mDa) | Diff (ppm) | Ion Formula | Ion    |
| 323.2581                   | 323.2581 | -0.01      | -0.02      | C20 H35 O3  | (M+H)+ |

Figure S10.1. HR-ESIMS spectrum of compound 15a.

## 12.QM-NMR calculation

Torsional sampling (MCMM) conformational searches using OPLS\_2005 force field were carried out by the means of conformational search module in Macro model 9.9.223 software (Schrodinger, <http://www.schrodinger.com/MacroModel>), applying an energy window of 21 kJ/mol (5.02 kcal/mol) for saving structures. Conformers above 1% population were re-optimized with Gaussian 09 at the B3LYP/6-311G(d,p) level with IEFPCM solvent model for acetonitrile.

The following DFT calculations were performed using Gaussian 09, and the dominant conformers were re-optimized at B3LYP/6-311G(d,p) level of theory. Magnetic shielding constants ( $\sigma$ ) were calculated by means of the gauge including atomic orbitals (GIAO) method at mPW1PW91/6-31 G(d) level of theory as recommended for DP4+ analysis.

### 12.1. Structure of studied isomers of compound 3.

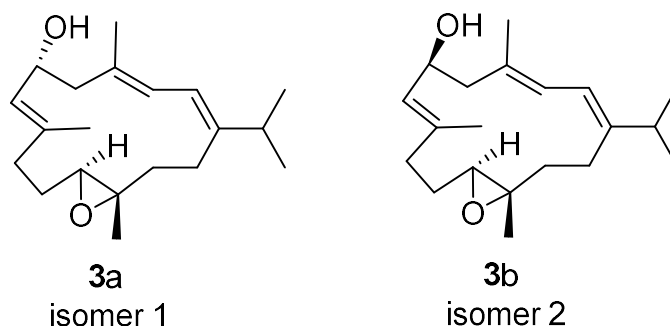

**Figure S11.1.** Two possible configurations of compound 3.

### 12.2. SCF energies computed at the PCM/mPW1PW91/6-31G\* level of theory for all conformers of studied isomers.

**3a\_6R11S12S\_1:** SCF energy (PCM/mPW1PW91/6-31G\*) = -931.56192291 a. u.

**3a\_6R11S12S\_2:** SCF energy (PCM/mPW1PW91/6-31G\*) = -931.56473866 a. u.

**3a\_6R11S12S\_3:** SCF energy (PCM/mPW1PW91/6-31G\*) = -931.56474077 a. u.

**3a\_6R11S12S\_4:** SCF energy (PCM/mPW1PW91/6-31G\*) = -931.56150640 a. u.

**3a\_6R11S12S\_5:** SCF energy (PCM/mPW1PW91/6-31G\*) = -931.56244883 a. u.

**3a\_6R11S12S\_6:** SCF energy (PCM/mPW1PW91/6-31G\*) = -931.56399453 a. u.

**3a\_6R11S12S\_7:** SCF energy (PCM/mPW1PW91/6-31G\*) = -931.56239668 a. u.

**3a\_6R11S12S\_8:** SCF energy (PCM/mPW1PW91/6-31G\*) = -931.56355852 a. u.

**3a\_6R11S12S\_9:** SCF energy (PCM/mPW1PW91/6-31G\*) = -931.55897310 a. u.

**3b\_6S11S12S\_1**: SCF energy (PCM/mPW1PW91/6-31G\*) = -931.55843435 a. u.  
**3b\_6S11S12S\_2**: SCF energy (PCM/mPW1PW91/6-31G\*) = -931.55519468 a. u.  
**3b\_6S11S12S\_3**: SCF energy (PCM/mPW1PW91/6-31G\*) = -931.55217040 a. u.  
**3b\_6S11S12S\_4**: SCF energy (PCM/mPW1PW91/6-31G\*) = -931.55473068 a. u.  
**3b\_6S11S12S\_5**: SCF energy (PCM/mPW1PW91/6-31G\*) = -931.55773570 a. u.  
**3b\_6S11S12S\_6**: SCF energy (PCM/mPW1PW91/6-31G\*) = -931.55806553 a. u.  
**3b\_6S11S12S\_7**: SCF energy (PCM/mPW1PW91/6-31G\*) = -931.55198124 a. u.  
**3b\_6S11S12S\_8**: SCF energy (PCM/mPW1PW91/6-31G\*) = -931.55451696 a. u.  
**3b\_6S11S12S\_9**: SCF energy (PCM/mPW1PW91/6-31G\*) = -931.55131077 a. u.  
**3b\_6S11S12S\_10**: SCF energy (PCM/mPW1PW91/6-31G\*) = -931.55806506 a. u.

**12.3.** DP4+ results obtained using experimental  $^1\text{H}$  and  $^{13}\text{C}$  data of compound **3** versus isomers **3a-3b**.

| Functional       | Solvent? | Basis Set | Type of Data      |          |          |          |
|------------------|----------|-----------|-------------------|----------|----------|----------|
| mPW1PW91         | PCM      | 6-31G(d)  | Shielding Tensors |          |          |          |
|                  | Isomer 1 | Isomer 2  | Isomer 3          | Isomer 4 | Isomer 5 | Isomer 6 |
| sDP4+ (H data)   | 100.00%  | 0.00%     | —                 | —        | —        | —        |
| sDP4+ (C data)   | 67.24%   | 32.76%    | —                 | —        | —        | —        |
| sDP4+ (all data) | 100.00%  | 0.00%     | —                 | —        | —        | —        |
| uDP4+ (H data)   | 100.00%  | 0.00%     | —                 | —        | —        | —        |
| uDP4+ (C data)   | 55.50%   | 44.50%    | —                 | —        | —        | —        |
| uDP4+ (all data) | 100.00%  | 0.00%     | —                 | —        | —        | —        |
| DP4+ (H data)    | 100.00%  | 0.00%     | —                 | —        | —        | —        |
| DP4+ (C data)    | 71.91%   | 28.09%    | —                 | —        | —        | —        |
| DP4+ (all data)  | 100.00%  | 0.00%     | —                 | —        | —        | —        |

**12.4.** Structure of studied isomers of compound **4**.

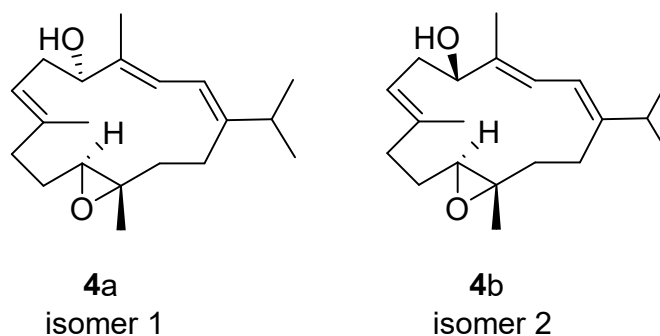

**Figure S11.2.** Two possible configurations of compound **4**.

**12.5.** SCF energies computed at the PCM/mPW1PW91/6-31G\* level of theory for all conformers of studied isomers.

**4a\_5R11S12S\_1:** SCF energy (PCM/mPW1PW91/6-31G\*) = -931.56095132 a. u.  
**4a\_5R11S12S\_2:** SCF energy (PCM/mPW1PW91/6-31G\*) = -931.56479510 a. u.  
**4a\_5R11S12S\_3:** SCF energy (PCM/mPW1PW91/6-31G\*) = -931.56033711 a. u.  
**4a\_5R11S12S\_4:** SCF energy (PCM/mPW1PW91/6-31G\*) = -931.56528750 a. u.  
**4a\_5R11S12S\_5:** SCF energy (PCM/mPW1PW91/6-31G\*) = -931.55940219 a. u.  
**4a\_5R11S12S\_6:** SCF energy (PCM/mPW1PW91/6-31G\*) = -931.56486809 a. u.  
**4a\_5R11S12S\_7:** SCF energy (PCM/mPW1PW91/6-31G\*) = -931.56362976 a. u.  
**4a\_5R11S12S\_8:** SCF energy (PCM/mPW1PW91/6-31G\*) = -931.56321472 a. u.  
**4a\_5R11S12S\_9:** SCF energy (PCM/mPW1PW91/6-31G\*) = -931.55994482 a. u.  
**4a\_5R11S12S\_10:** SCF energy (PCM/mPW1PW91/6-31G\*) = -931.56227741 a. u.  
**4b\_5S11S12S\_1:** SCF energy (PCM/mPW1PW91/6-31G\*) = -931.56559011 a. u.  
**4b\_5S11S12S\_2:** SCF energy (PCM/mPW1PW91/6-31G\*) = -931.56612488 a. u.  
**4b\_5S11S12S\_3:** SCF energy (PCM/mPW1PW91/6-31G\*) = -931.56559008 a. u.  
**4b\_5S11S12S\_4:** SCF energy (PCM/mPW1PW91/6-31G\*) = -931.56513833 a. u.  
**4b\_5S11S12S\_5:** SCF energy (PCM/mPW1PW91/6-31G\*) = -931.56568095 a. u.  
**4b\_5S11S12S\_6:** SCF energy (PCM/mPW1PW91/6-31G\*) = -931.55884239 a. u.  
**4b\_5S11S12S\_7:** SCF energy (PCM/mPW1PW91/6-31G\*) = -931.56066577 a. u.  
**4b\_5S11S12S\_8:** SCF energy (PCM/mPW1PW91/6-31G\*) = -931.55451696 a. u.  
**4b\_5S11S12S\_9:** SCF energy (PCM/mPW1PW91/6-31G\*) = -931.56230067 a. u.  
**4b\_5S11S12S\_10:** SCF energy (PCM/mPW1PW91/6-31G\*) = -931.56376243 a. u.

**12.6.** DP4+ results obtained using experimental <sup>1</sup>H and <sup>13</sup>C data of compound **4** versus isomers **4a-4b**.

| Functional       | Solvent? | Basis Set | Type of Data      |          |          |          |
|------------------|----------|-----------|-------------------|----------|----------|----------|
| mPW1PW91         | PCM      | 6-31G(d)  | Shielding Tensors |          |          |          |
|                  | Isomer 1 | Isomer 2  | Isomer 3          | Isomer 4 | Isomer 5 | Isomer 6 |
| sDP4+ (H data)   | 96.82%   | 3.18%     | —                 | —        | —        | —        |
| sDP4+ (C data)   | 99.17%   | 0.83%     | —                 | —        | —        | —        |
| sDP4+ (all data) | 99.97%   | 0.03%     | —                 | —        | —        | —        |
| uDP4+ (H data)   | 97.65%   | 2.35%     | —                 | —        | —        | —        |
| uDP4+ (C data)   | 98.70%   | 1.30%     | —                 | —        | —        | —        |
| uDP4+ (all data) | 99.97%   | 0.03%     | —                 | —        | —        | —        |
| DP4+ (H data)    | 99.92%   | 0.08%     | —                 | —        | —        | —        |
| DP4+ (C data)    | 99.99%   | 0.01%     | —                 | —        | —        | —        |
| DP4+ (all data)  | 100.00%  | 0.00%     | —                 | —        | —        | —        |

### 12.7. Structure of studied isomers of compound 5.

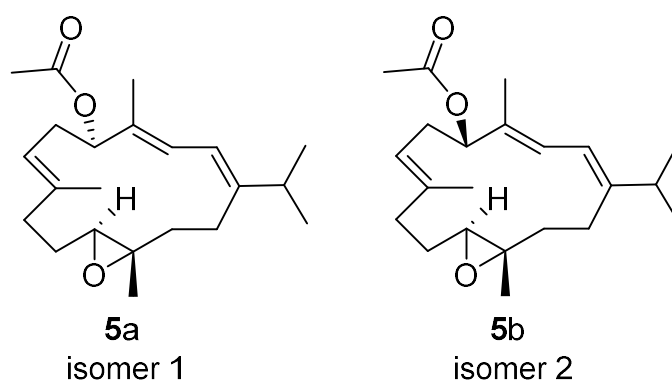

**Figure S11.3.** Two possible configurations of compound 5.

### 12.8. SCF energies computed at the PCM/mPW1PW91/6-31G\* level of theory for all conformers of studied isomers.

**5a\_5R11S12S\_1:** SCF energy (PCM/mPW1PW91/6-31G\*) = -1084.18727565 a. u.

**5a\_5R11S12S\_2:** SCF energy (PCM/mPW1PW91/6-31G\*) = -1084.19113432 a. u.

**5a\_5R11S12S\_4:** SCF energy (PCM/mPW1PW91/6-31G\*) = -1084.19102676 a. u.

**5a\_5R11S12S\_5:** SCF energy (PCM/mPW1PW91/6-31G\*) = -1084.19029245 a. u.

**5a\_5R11S12S\_6:** SCF energy (PCM/mPW1PW91/6-31G\*) = -1084.18339270 a. u.

**5a\_5R11S12S\_7:** SCF energy (PCM/mPW1PW91/6-31G\*) = -1084.18710949 a. u.

**5a\_5R11S12S\_8:** SCF energy (PCM/mPW1PW91/6-31G\*) = -1084.18545285 a. u.

**5a\_5R11S12S\_9:** SCF energy (PCM/mPW1PW91/6-31G\*) = -1084.18849334 a. u.

**5a\_5R11S12S\_10:** SCF energy (PCM/mPW1PW91/6-31G\*) = -1084.18228246 a. u.

**5b\_5S11S12S\_1:** SCF energy (PCM/mPW1PW91/6-31G\*) = -1084.18629387 a. u.

**5b\_5S11S12S\_2:** SCF energy (PCM/mPW1PW91/6-31G\*) = -1084.18791705 a. u.

**5b\_5S11S12S\_3:** SCF energy (PCM/mPW1PW91/6-31G\*) = -1084.18759467 a. u.

**5b\_5S11S12S\_4:** SCF energy (PCM/mPW1PW91/6-31G\*) = -1084.18796802a. u.

**5b\_5S11S12S\_5:** SCF energy (PCM/mPW1PW91/6-31G\*) = -1084.18761750 a. u.

**5b\_5S11S12S\_6:** SCF energy (PCM/mPW1PW91/6-31G\*) = -1084.18735303 a. u.

**5b\_5S11S12S\_7:** SCF energy (PCM/mPW1PW91/6-31G\*) = -1084.18695579 a. u.

**5b\_5S11S12S\_8:** SCF energy (PCM/mPW1PW91/6-31G\*) = -1084.18614398 a. u.

**5b\_5S11S12S\_9:** SCF energy (PCM/mPW1PW91/6-31G\*) = -1084.19250519 a. u.

**5b\_5S11S12S\_10:** SCF energy (PCM/mPW1PW91/6-31G\*) = -1084.18269693 a. u.

**5b\_5S11S12S\_11:** SCF energy (PCM/mPW1PW91/6-31G\*) = -1084.19269867 a. u.

**5b\_5S11S12S\_12:** SCF energy (PCM/mPW1PW91/6-31G\*) = -1084.18521306 a. u.

## 12.9. DP4+ results obtained using experimental <sup>13</sup>C data of compound **5** versus isomers **5a-5b**.

| Functional<br>mPW1PW91 | Solvent?<br>PCM |          | Basis Set<br>6-31G(d) |          | Type of Data<br>Shielding Tensors |          |
|------------------------|-----------------|----------|-----------------------|----------|-----------------------------------|----------|
|                        | Isomer 1        | Isomer 2 | Isomer 3              | Isomer 4 | Isomer 5                          | Isomer 6 |
| sDP4+ (H data)         | —               | —        | —                     | —        | —                                 | —        |
| sDP4+ (C data)         | 81.76%          | 18.24%   | —                     | —        | —                                 | —        |
| sDP4+ (all data)       | 81.76%          | 18.24%   | —                     | —        | —                                 | —        |
| uDP4+ (H data)         | —               | —        | —                     | —        | —                                 | —        |
| uDP4+ (C data)         | 97.89%          | 2.11%    | —                     | —        | —                                 | —        |
| uDP4+ (all data)       | 97.89%          | 2.11%    | —                     | —        | —                                 | —        |
| DP4+ (H data)          | —               | —        | —                     | —        | —                                 | —        |
| DP4+ (C data)          | 99.52%          | 0.48%    | —                     | —        | —                                 | —        |
| DP4+ (all data)        | 99.52%          | 0.48%    | —                     | —        | —                                 | —        |

## 13. TDDFT-ECD calculation

Conformational searches were done following the general protocols previously described for DP4+ calculation. For the resulting geometries, ECD spectra were obtained by TDDFT calculations performed with the same functional, basis set and solvent model as the energy optimization. Finally, the Boltzmann-averaged ECD spectra of **3**, **4**, **5** was obtained with SpecDis1.62 software.

Re-optimized conformers of (6*R*, 11*S*, 12*S*)-**3**, (5*S*, 11*R*, 12*R*)-**4** and (5*S*, 11*R*, 12*R*)-**5** calculated at the B3LYP/6-311G(d,p) level with IEFPCM solvent model for acetonitrile.

(6*R*,11*S*,12*S*)-**3**:

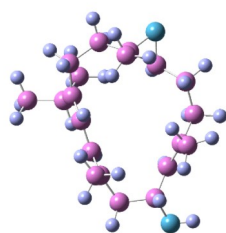

Conf.1  
46.351%  
-932.02316965

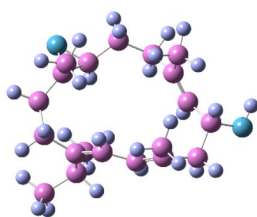

Conf.2  
6.996%  
-932.02637025

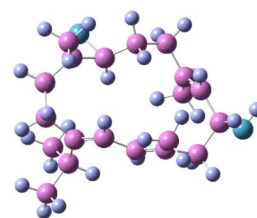

Conf.3  
6.069%  
-932.02637081

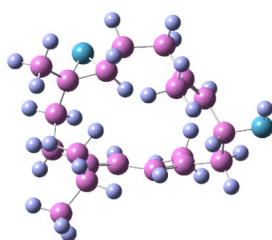

Conf.4  
4.414%  
-932.02275117

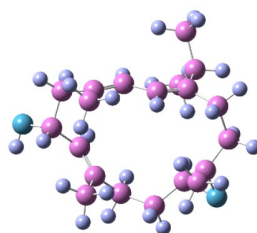

Conf.5  
3.548%  
-932.02360346

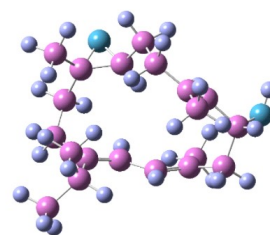

Conf.6  
2.465%  
-932.02549192

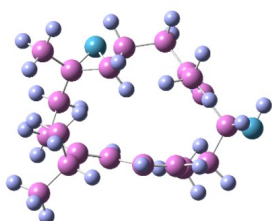

Conf.7  
2.238%  
-932.02367638

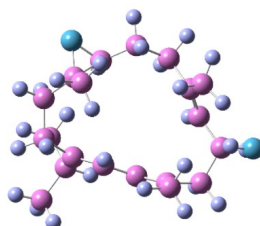

Conf.8  
1.970%  
-932.02536473

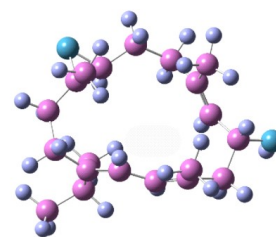

Conf.9  
1.928%  
-932.02536480

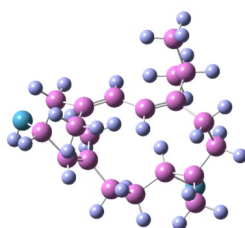

Conf.10  
1.809%  
-932.02014682



(5*S*,11*R*,12*R*)-4:

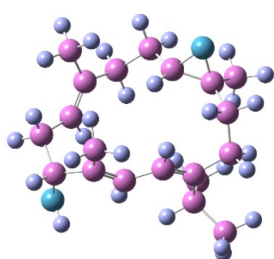

Conf.1  
18.344%  
-932.02021594

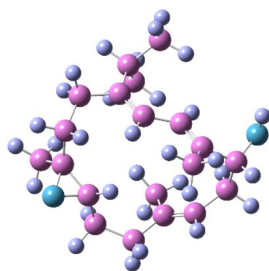

Conf.2  
8.240%  
-932.01125249

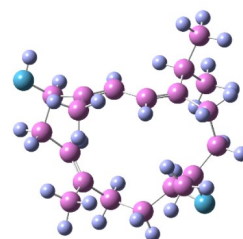

Conf.3  
7.269%  
-932.01818844

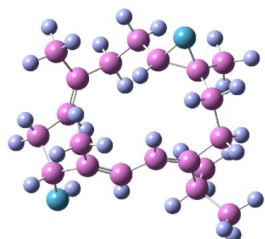

Conf.4  
6.894%  
-932.01742412

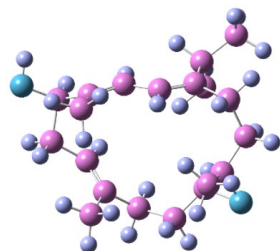

Conf.5  
6.381%  
-932.01768800

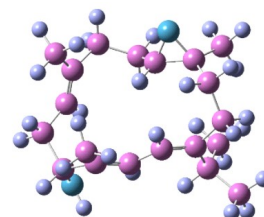

Conf.6  
6.102%  
-932.01914903

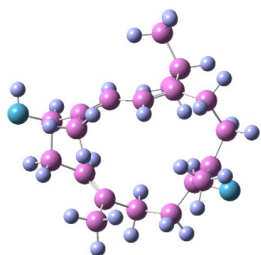

Conf.7  
3.780%  
-932.01663065

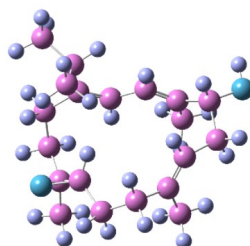

Conf.8  
3.253%  
-932.01873298

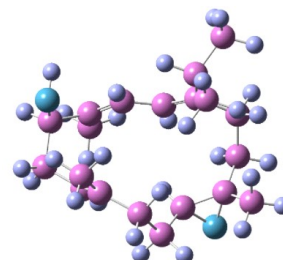

Conf.9  
3.038%  
-932.01509060

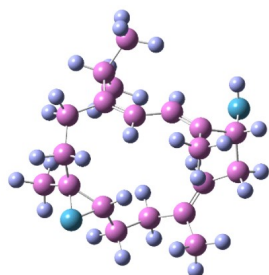

Conf.10  
1.887%  
-932.01638942

(5*S*,11*R*,12*R*)-5:

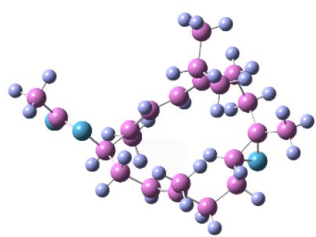

Conf.1  
29.706%  
-1084.72465736

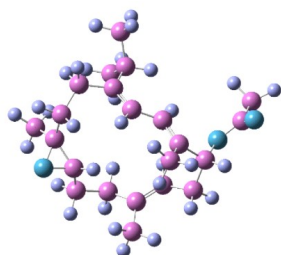

Conf.2  
26.304%  
-1084.72820327

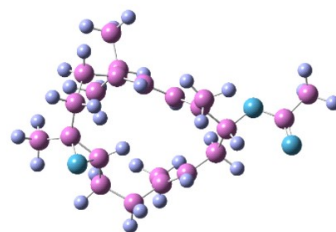

Conf.3  
7.695%  
-1084.72453048

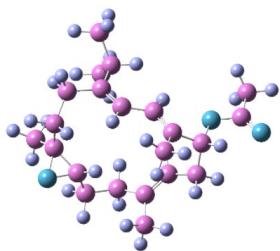

Conf.4  
7.200%  
-1084.72770455

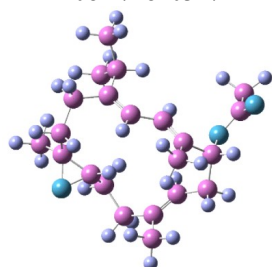

Conf.5  
2.739%  
-1084.72713683

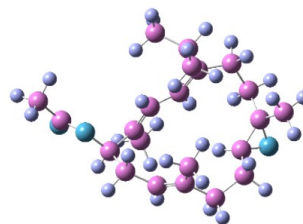

Conf.6  
1.926%  
-1084.72086174

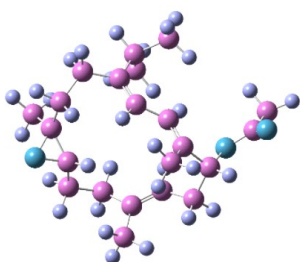

Conf.7  
1.655%  
-1084.72431105

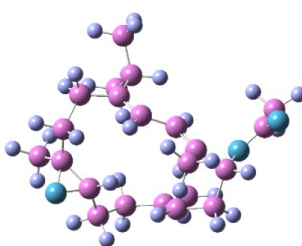

Conf.8  
1.584%  
-1084.72264945

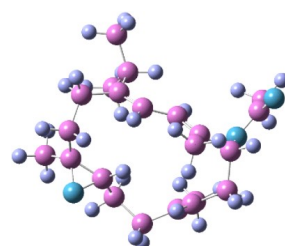

Conf.9  
1.537%  
-1084.72579464

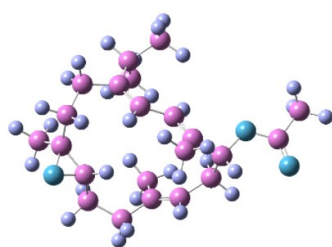

Conf.10  
1.065%  
-1084.71985734
